# Supplementary material for: What factors are associated with reporting lacking interest in sex and how do these vary by gender? Findings from the third British national survey of sexual attitudes and lifestyles
Source: PubMed Central journal article supplement (PMC5722087; doi:10.1136/bmjopen-2017-016942), 2017-09-13
Supplement: bmjopen-2017-016942.draft_revisions.pdf [file bmjopen-2017-016942.draft_revisions.pdf]

# BMJ Open

BMJ Open is committed to open peer review. As part of this commitment we make the peer review history of every article we publish publicly available.

When an article is published we post the peer reviewers' comments and the authors' responses online. We also post the versions of the paper that were used during peer review. These are the versions that the peer review comments apply to.

The versions of the paper that follow are the versions that were submitted during the peer review process. They are not the versions of record or the final published versions. They should not be cited or distributed as the published version of this manuscript.

BMJ Open is an open access journal and the full, final, typeset and author-corrected version of record of the manuscript is available on our site with no access controls, subscription charges or pay-per-view fees (<http://bmjopen.bmj.com>).

If you have any questions on BMJ Open's open peer review process please email [info.bmjopen@bmj.com](mailto:info.bmjopen@bmj.com)

# BMJ Open

## Factors associated with reporting lacking interest in sex and their interaction with gender: Findings from the third British National Survey of Sexual Attitudes and Lifestyles

|                                 |                                                                                                                                                                                                                                                                                                                                                                                                                                                                                                                                                                                                                |
|---------------------------------|----------------------------------------------------------------------------------------------------------------------------------------------------------------------------------------------------------------------------------------------------------------------------------------------------------------------------------------------------------------------------------------------------------------------------------------------------------------------------------------------------------------------------------------------------------------------------------------------------------------|
| Journal:                        | <i>BMJ Open</i>                                                                                                                                                                                                                                                                                                                                                                                                                                                                                                                                                                                                |
| Manuscript ID                   | bmjopen-2017-016942                                                                                                                                                                                                                                                                                                                                                                                                                                                                                                                                                                                            |
| Article Type:                   | Research                                                                                                                                                                                                                                                                                                                                                                                                                                                                                                                                                                                                       |
| Date Submitted by the Author:   | 20-Mar-2017                                                                                                                                                                                                                                                                                                                                                                                                                                                                                                                                                                                                    |
| Complete List of Authors:       | Graham, Cynthia; University of Southampton, Psychology<br>Mercer, Catherine; University College London, Research Department of Infection and Population Health<br>Tanton, Clare; University College London, Research Department of Infection & Population Health<br>Jones, Kyle; University College London, Research Department of Infection and Population Health<br>Johnson, Anne; University College London, Research Department of Infection and Population Health<br>Wellings, Kaye; London School of Hygiene and Tropical Medicine,<br>Mitchell, Kirstin; London School of Hygiene and Tropical Medicine |
| <b>Primary Subject Heading</b>: | Sexual health                                                                                                                                                                                                                                                                                                                                                                                                                                                                                                                                                                                                  |
| Secondary Subject Heading:      | Epidemiology                                                                                                                                                                                                                                                                                                                                                                                                                                                                                                                                                                                                   |
| Keywords:                       | SEXUAL MEDICINE, EPIDEMIOLOGY, Sexual and gender disorders < PSYCHIATRY                                                                                                                                                                                                                                                                                                                                                                                                                                                                                                                                        |
|                                 |                                                                                                                                                                                                                                                                                                                                                                                                                                                                                                                                                                                                                |

SCHOLARONE™  
Manuscripts

1  
2  
3 **Factors associated with reporting lacking interest in sex and their interaction with**  
4 **gender: Findings from the third British National Survey of Sexual Attitudes and**  
5 **Lifestyles**  
6

7  
8 Graham, C. A.,<sup>1</sup> Mercer, C. H.,<sup>2</sup> Tanton, C.,<sup>2</sup> Jones, K. G.,<sup>2</sup> Johnson, A. M.,<sup>2</sup> Wellings, K.,<sup>3</sup>  
9 Mitchell, K. R.<sup>3,4</sup>  
10

11  
12 <sup>1</sup>Centre for Sexual Health Research, Department of Psychology, University of  
13 Southampton, Southampton, U.K.

14 <sup>2</sup>Centre for Sexual Health and HIV Research, Research Department of Infection &  
15 Population Health, University College London, London, U.K.

16 <sup>3</sup>Centre for Sexual and Reproductive Health Research, Department of Social and  
17 Environmental Health Research, London School of Hygiene and Tropical Medicine,  
18 London, U.K.

19 <sup>4</sup>MRC/CSO Social and Public Health Sciences Unit, University of Glasgow, 200 Renfield  
20 Street, Glasgow G2 3QB, U.K.  
21

22  
23  
24 Corresponding author:

25 Cynthia A. Graham

26 Department of Psychology

27 Faculty of Social, Human, and Mathematical Sciences

28 Shackleton Building (B44)

29 University of Southampton

30 Highfield, Southampton

31 SO17 1BJ UK

32 tel: 023 8059 3091

33 e-mail: C.A.Graham@soton.ac.uk  
34  
35  
36  
37

38 Word count: 3,296  
39  
40  
41  
42  
43  
44  
45  
46  
47  
48  
49  
50  
51  
52  
53  
54  
55  
56  
57  
58  
59  
60

## ABSTRACT

**Objectives:** To investigate factors associated with reporting lacking interest in sex, and how these vary by gender.

**Setting:** British general population.

**Design:** Complex survey analyses of data collected for a cross-sectional probability sample survey, undertaken 2010-12, specifically logistic regression to calculate age-adjusted odds ratios (AOR) to identify associated factors.

**Participants:** 4,839 men and 6,669 women aged 16-74 years who reported  $\geq 1$  sexual partner (opposite-sex or same-sex) in the past year for the third National Survey of Sexual Attitudes and Lifestyles [Natsal-3].

**Main outcome measure:** Lacking interest in sex for  $\geq 3$  months in the past year.

**Results:** Overall, 15.0% (13.9-16.2) of men and 34.2% (32.8-35.5) of women reported lacking interest in sex. This was associated with age and physical and mental health for both men and women, including self-reported general health and current depression. Lacking interest in sex was more prevalent among men and women reporting STI diagnoses (ever), non-volitional sex (ever), and holding sexual attitudes related to normative expectations about sex. Some gender similarities in associated relationship and family-related factors were evident, including partner having had sexual difficulties in the last year (M: AOR:1.41 [1.07-1.86]; W: AOR:1.60 [1.32-1.94]), not feeling emotionally close to partner during sex (M: 3.74 [1.76-7.93]; W: 4.80 [2.99-7.69]), and ease of talking about sex (M: 1.53 [1.23-1.90] W: 2.06 [1.77-2.39]). Among women only, lack of interest in sex was higher among those in a relationship of  $>1$  year in duration and those not sharing the same level of interest (4.57 [3.87-5.38]) or preferences (2.91 [2.22-3.83]) with a partner.

**Conclusions:** Both gender similarities and differences were found in factors associated with lacking interest in sex, with the most marked differences in relation to some relationship variables. Findings highlight the need to assess, and if appropriate, treat lacking interest in sex in a holistic and relationship-specific way.

## ARTICLE SUMMARY

**Strengths and limitations of this study**

- This study used nationally representative data to investigate factors associated with reporting lacking interest in sex, and how these vary by gender, in the British population.
- The study included detailed assessment of a range of relationship context and attitudinal variables seldom included in previous population-based surveys.
- Information about lacking interest in sex was assessed with a single item, asking participants whether they had lacked interest in having sex for a period of three months or more in the past year. Those who reported this were also asked whether they experienced associated distress.
- The cross-sectional data do not allow us to establish the causal direction of associations between lacking interest in sex and factors.

1  
2  
3 In Britain's third National Survey of Sexual Attitudes and Lifestyles (Natsal-3)  
4  
5 lacking interest in sex was the most common sexual difficulty reported by both men  
6  
7 and women (1). It was more frequently reported by women than by men; 34.2% of  
8  
9 women compared with 14.9% of men stated that they had lacked interest in sex for 3  
10  
11 months or more in the past year. When duration and symptom severity criteria are  
12  
13 considered (i.e., that symptoms last six months or more and occur "very often" or  
14  
15 "always") these prevalence estimates are much lower (2), but the gender difference is  
16  
17 maintained.  
18  
19  
20

21  
22 Researchers have paid more attention to problems of low sexual interest in  
23  
24 women than in men (3-5). Among men the predominant focus has been on erectile  
25  
26 functioning and on physiological causes of lacking interest in sex such as hormonal  
27  
28 status, rather than on psychosocial determinants. This lack of attention to male  
29  
30 problems is reflected in recent revisions to the Diagnostic and Statistical Manual  
31  
32 (DSM-5) classification of sexual disorders (6) which involved major changes to sexual  
33  
34 arousal and desire disorder categories in women, but no substantive changes for male  
35  
36 disorders.  
37  
38  
39

40  
41 Most but not all studies involving men have reported an association between  
42  
43 low sexual interest and increasing age (for review, see 7). However, there are  
44  
45 conflicting findings on the association with physical and mental health (8,9). Limited  
46  
47 research suggests that psychosocial and relationship factors may also be associated  
48  
49 with low sexual desire in men (8, 10-12).  
50  
51

52  
53 Among women, factors that have been consistently associated with lacking  
54  
55 interest in sex are relationship problems, relationship quality, and partner's sexual  
56  
57 functioning (13-17), poor physical health (18), and negative mood states/depression  
58  
59  
60

1  
2  
3 (13, 18,19). There are inconsistent findings on the association between low sexual  
4  
5 interest and both age and menopausal status (14,18). Few large-scale surveys have  
6  
7 examined possible links between lacking interest in sex and sexual attitudes and  
8  
9 lifestyles.  
10

11  
12 Studies have, for the most part, used small, clinical samples of patients seeking  
13  
14 treatment for low sexual desire problems. The potential for bias in such studies is  
15  
16 revealed in previously reported findings from Natsal-3 that only 14.4% of men and  
17  
18 16.6% of women with sexual function problems had sought help or advice (1). The few  
19  
20 large-scale probability-based surveys involving both men and women have focused on  
21  
22 associations between low sexual desire and sociodemographic factors. In summary,  
23  
24 the evidence on the factors associated with men's and women's reports of low sexual  
25  
26 desire is drawn largely from non-representative samples, is somewhat equivocal and,  
27  
28 in men, sparse.  
29  
30  
31  
32

33  
34 The research questions addressed in this paper are: What sociodemographic,  
35  
36 relationship, sexual behaviour, and sexual attitudinal factors are associated with  
37  
38 lacking interest in sex in sexually active men and women?; and to what extent do  
39  
40 these factors vary by gender?  
41  
42

## 43 METHOD

### 44 Participants and Procedure

45  
46 Natsal-3 is a probability sample survey of 15,162 men and women aged 16-74  
47  
48 years in Britain, interviewed between September 2010 and August 2012. A multi-  
49  
50 stage, clustered, and stratified probability sample design was used and participants  
51  
52 were interviewed using a combination of computer-assisted personal interviews  
53  
54 (CAPI), and computer-assisted self-interviews (CASI). After weighting to adjust for  
55  
56  
57  
58  
59  
60

1  
2  
3 unequal probabilities of selection and to match the British population in terms of age,  
4  
5 gender and geographical region, the Natsal-3 sample was broadly representative, on  
6  
7 key variables, of the British population as described by the 2011 Census (20).  
8  
9

10 The estimated response rate was 57.7%, and the estimated cooperation rate  
11  
12 (the number of interviews completed from eligible addresses for which contact was  
13  
14 made) was 65.8% (of all eligible addressed contacted) (21). Fuller details of the survey  
15  
16 methodology and sample characteristics are published elsewhere (20, 21) and for  
17  
18 demographic characteristics of the sample, see (21). Participants provided oral  
19  
20 informed consent for interviews and the survey was approved by the NRES Committee  
21  
22 South-Central – Oxford A (Ref.: 10/H0604/27).  
23  
24  
25

### 26 **Outcome Measures**

27  
28 In the CASI, participants who reported at least one sexual partner in the past  
29  
30 year (hereon 'sexually active participants') were asked whether they had lacked  
31  
32 interest in having sex for a period of three months or more in the past year. We used  
33  
34 selected items from the Natsal-SF, a newly developed and validated measure of sexual  
35  
36 function comprising questions about problems with sexual response, relational  
37  
38 aspects of sexual function, and self-appraisal of sex life (22, 23).  
39  
40  
41  
42

### 43 **Statistical Analysis**

44  
45 All analyses were done using the complex survey functions of STATA (version  
46  
47 14; StataCorp LP, College Station, Texas) to account for the weighting, clustering, and  
48  
49 stratification of the data. We used multivariable logistic regression to calculate age-  
50  
51 adjusted odds ratios (AOR) to examine the associations between reports of lacking  
52  
53 interest in sex lasting three months or longer in the past year, and sociodemographic,  
54  
55 health, relationship, sexual behaviour, and sexual attitude variables. For each variable,  
56  
57  
58  
59  
60



1  
2  
3 we also tested the interaction between gender, to see if the magnitude of the  
4  
5 associations between the above factors and reports of lacking interest in sex was the  
6  
7 same for men and women. We conducted a sensitivity analysis for the outcome  
8  
9 variable reporting lack of interest in sex lasting three months or longer *and* distress  
10  
11 about this symptom to assess whether similar associations were found. We also  
12  
13 examined the association between reporting lacking interest in sex and the other  
14  
15 sexual function problems asked about in Natsal-3, using AORs.  
16  
17  
18  
19

## 20 RESULTS

21  
22 Overall, 15.0 (95% CI 13.9-16.2) of sexually active men and 34.2% (95% CI 32.8-  
23  
24 35.5) of sexually active women reported lacking interest in sex for three months or  
25  
26 longer in the year prior to interview. Table 1 presents the associations between  
27  
28 lacking interest in sex and sociodemographic, health, relationship, sexual behaviour,  
29  
30 and sexual attitudinal variables for men and women.  
31  
32

33  
34 Age was significantly associated with lacking interest in sex. Prevalence  
35  
36 increased with age, being lowest among younger participants (16-24 years; M: 11.5%;  
37  
38 W: 24.8%) and peaking in men aged 35-44 years (17.2%) and in women aged 55-64  
39  
40 years (38.8%). Regarding demographic variables, after adjusting for age, lack of  
41  
42 interest was associated with leaving school at 16 (men only; AOR: 1.31), being  
43  
44 unemployed (men only; AOR: 1.44), and less frequent religious practice (women only;  
45  
46 AOR: 0.79).  
47  
48  
49

50  
51 After adjusting for age, there were associations between all physical and  
52  
53 mental health variables assessed and lacking interest in sex. Individuals in poorer  
54  
55 health (AORs: M: 3.29; W: 1.93), those who had difficulty walking upstairs (AORs: M:  
56  
57 1.8; W: 1.15), those with a longstanding medical condition (AORs: M 1.76; W: 1.35),  
58  
59  
60

1  
2  
3 and those who had screened positive for current depression (AORs: M: 2.95; W: 2.79)  
4  
5 or who had been treated for depression in the past year (AORs: M: 2.82; W: 2.32)  
6  
7 were more likely to report lacking interest in sex. The magnitude of these associations  
8  
9 was similar for men and women. Menopausal status in women and circumcision in  
10  
11 men were not associated with the likelihood of lacking sexual interest.  
12  
13

14  
15       Regarding sexual behaviour, among both men and women, lack of interest was  
16  
17 associated with frequency of sexual activity (defined as vaginal, oral or anal  
18  
19 intercourse) in the four weeks prior to interview; 12.4% of men, and 33.8% of women  
20  
21 who reported having engaged in at least 3 sexual acts reported lack of interest, vs.  
22  
23 20.7% of men and 42.9% of women who reported no sexual activity. Associations with  
24  
25 recent masturbation differed by gender; lack of interest in sex was *more* common  
26  
27 among men who reported having recently masturbated but *less* common among  
28  
29 women who did so. Women with two or more partners in the past year were less  
30  
31 likely to report low sexual interest than those with only one partner (AOR: 0.70) but  
32  
33 this association was not seen among men.  
34  
35  
36  
37

38  
39       Associations were found between lacking interest in sex and several  
40  
41 relationship contextual variables and for many of these variables associations were  
42  
43 stronger for women than for men. For both men and women, lack of interest was  
44  
45 associated with relationship status, although the association was stronger among  
46  
47 women than men. Compared to those living with a partner, men and women in a  
48  
49 steady relationship but not living together, and women not in a steady relationship  
50  
51 were less likely to report lacking interest in sex. Longer duration of most recent sexual  
52  
53 relationship was significantly associated with lacking interest in sex only among  
54  
55 women, increasing with longer relationship duration. Having been pregnant in the last  
56  
57  
58  
59  
60

1  
2  
3 year was associated with lacking sexual interest as was having one or more young  
4  
5 child(ren).  
6

7  
8 Among both men and women, there was an association between ease of  
9  
10 communication and lacking interest in sex. Those who found it “always easy to talk  
11  
12 about sex” with their partner were less likely to report low interest. Lack of interest  
13  
14 was more likely among those whose partner had sexual difficulties in the last year, and  
15  
16 those who reported a lower assessment of happiness with the relationship, and not  
17  
18 feeling emotionally close to partner during sex. Among women but not men, not  
19  
20 sharing the same level of sexual interest with a partner, and not sharing the same  
21  
22 sexual likes and dislikes, were also associated.  
23  
24  
25

26  
27 Lack of interest in sex was significantly associated with a range of sexual health  
28  
29 indicators, including sexual competence at first sex and previous STI diagnosis. The  
30  
31 strength and direction of associations was similar for men and women, except for  
32  
33 reporting another sexual function problem, which was significant for two or more  
34  
35 problems in men, but one or more problems in women.  
36  
37

38  
39 Regarding attitudinal variables, both men and women who endorsed  
40  
41 statements that “people are under pressure to have sex” and “people want less sex as  
42  
43 they age” were more likely to report lacking interest in sex over the past year. The  
44  
45 only attitudinal variable that showed a significant interaction with gender was the one  
46  
47 related to men having a “naturally higher sex drive than women.” Men who agreed  
48  
49 with this statement were *less* likely than those who disagreed to lack interest in sex,  
50  
51 while the reverse was true among women.  
52  
53  
54

55 Table 2 (online supplementary file) presents the associations between lacking  
56  
57 interest in sex and being distressed about this (as a measure/marker of severity), and  
58  
59  
60



1  
2  
3 low sexual interest complaints (14, 27) and yet more have shown lack of sexual  
4  
5 interest to be more common among younger women (18). Whereas we found a  
6  
7 marginal relationship with age in men, some studies (though not all e.g., 28) have  
8  
9 found a stronger relationship (12, 29). It is possible that the varied findings might in  
10  
11 part be a result of varied definitions of low sexual interest or samples with different  
12  
13 age ranges.  
14  
15

16  
17 The finding in this analysis, that having young children appears to increase the  
18  
19 likelihood of reporting lack of sexual interest for women, but not for men, remains  
20  
21 unchanged since the previous Natsal-2 survey (30). This may be due to fatigue  
22  
23 associated with a primary caring role (31), the fact that daily stress appears to affect  
24  
25 sexual functioning in women more than men (32), or possibly a shift in focus of  
26  
27 attention attendant on bringing up small children.  
28  
29

30  
31 The finding of a link between lacking interest in sex and lacking enjoyment in  
32  
33 sex and/or feeling no excitement or arousal during sex is not surprising and has been  
34  
35 shown in previous studies (3). The strong associations between lack of interest in sex  
36  
37 and physical and mental health indicators, which we observed for both men and  
38  
39 women, is not entirely consistent with findings from other studies. While this link has  
40  
41 been persuasively shown for women (13, 18, 19), in men, the evidence is more  
42  
43 equivocal. In a study of men attending an outpatient clinic for sexual problems,  
44  
45 psychological symptoms such as anxiety and depression were more predictive of low  
46  
47 sexual desire than hormonal or other physical markers (11). In contrast, DeRogatis et  
48  
49 al. (9), in their study of men with erectile dysfunction, observed no differences in  
50  
51 depressive symptoms, concurrent illness, or medication use between men with and  
52  
53 without symptoms of low sexual desire.  
54  
55  
56  
57  
58  
59  
60

1  
2  
3 The gender differences in associations between masturbation and a lack of  
4 sexual interest are interesting and have been explored in few previous population-  
5 based studies. Our observation that lack of interest was *more* commonly reported by  
6 men who had recently masturbated, but *less* commonly reported by women who had  
7 done so may reflect a tendency among women for self-pleasuring to be, not a  
8 substitute for partnered sex but instead a part of a broader repertoire of sexual  
9 fulfilment; this possibility is worthy of further exploration. In contrast, for men  
10 frequency of masturbation reflects reduced frequency of partnered sex (33). However,  
11 it is worth noting that in the U.S. National Health and Social Life Survey, lifetime  
12 number of sexual partners and masturbation practices were unrelated to the  
13 likelihood of sexual desire difficulties for either men or women (34).  
14  
15  
16  
17  
18  
19  
20  
21  
22  
23  
24  
25  
26  
27  
28

29 Our observation that duration of most recent sexual relationship showed a  
30 strong association with lacking interest in sex in women is consistent with previous  
31 studies (15, 17). There has been little comparable research among men with which to  
32 corroborate the absence of such an association among men in our analysis.  
33  
34  
35  
36  
37  
38

39 Our data confirm the importance of the relational context in individuals' level  
40 of sexual interest. The strong associations between relationship and partner factors  
41 and sexual interest are consistent with those shown in many previous studies relating  
42 to women (13-17) and with a much smaller literature in men (35,36). In particular,  
43 sexual dysfunction in a male partner has previously been associated with women's  
44 levels of sexual desire (15, 37, 38), and sexual desire discrepancy in couples has been  
45 linked to lower reported relationship satisfaction and more couple conflict (39).  
46  
47  
48  
49  
50  
51  
52  
53  
54

55 The strong links found between several key sexual health outcomes and lack of  
56 interest in sex are interesting; among both men and women, reporting an STI  
57  
58  
59  
60

1  
2  
3 diagnosis, and non-volitional sex were associated with reporting lack of interest in sex.  
4  
5 Our finding that lacking “sexual competence” at first sexual intercourse was linked  
6  
7 with subsequent lack of interest in sex among women but not men, may reflect a  
8  
9 greater salience of contextual aspects of first sex for women. More women than men  
10  
11 report being pressured by a partner on the first occasion of heterosexual intercourse,  
12  
13 and to have subsequently experienced regret about first sexual experiences (40).  
14  
15 These findings suggest that for women, early sexual experiences may shape future  
16  
17 sexual encounters/relationships to a greater extent than for men.  
18  
19

20  
21  
22 To our knowledge no previous studies have assessed the association between  
23  
24 attitudes toward sexual matters and lack of interest in sex. Endorsing the assumption  
25  
26 that “people want less sex as they age” was associated with lack of interest in both  
27  
28 genders. It might be that this belief contributes to a decline in interest, or – equally  
29  
30 plausible – that those who lack interest adopt this attitude to avoid viewing their  
31  
32 experience as problematic. Interestingly, men who endorsed the view that “men have  
33  
34 a higher sex drive than women” were significantly *less* likely to report lacking interest  
35  
36 in sex, whereas women who agreed with this statement were *more* likely to do so. If  
37  
38 people responded to this statement with reference to their own relationship, these  
39  
40 findings may be seen as making intuitive sense. The results suggest that endorsing  
41  
42 stereotypical gender-norms related to sex may adversely affect women more than  
43  
44 men.  
45  
46  
47  
48  
49

### 50 **Strengths and Limitations**

51  
52 Strengths of our study include the use of national probability sample survey  
53  
54 data involving both men and women across a wide age range (20, 21). With a few  
55  
56 exceptions (e.g., 12, 14, 28, 41), most surveys on sexual desire problems have sampled  
57  
58  
59  
60

1  
2  
3 either men *or* women, precluding direct comparisons within the same sample.  
4

5 Another strength was the detailed and holistic examination of relationship context  
6  
7 and attitudinal variables, which few previous studies have reported. Response rates  
8  
9 for Natsal-3 were also similar to those of other major social surveys in Britain (42) and  
10  
11 higher than many previous surveys of sexual problems (34, 43).  
12  
13

14  
15 Limitations include the cross-sectional nature of the data, which mean that we  
16  
17 are unable to infer temporality and causality. We only used a single item to assess  
18  
19 lacking interest in sex, although we additionally took account of whether those who  
20  
21 reported this also reported that it caused them distress, as a way of trying to capture  
22  
23 more problematic lack of interest. It is important to acknowledge, however, that these  
24  
25 data do not necessarily correspond to clinical diagnoses. This sensitivity analysis  
26  
27 enabled us to demonstrate that similar associations exist regardless of whether or not  
28  
29 distress was reported.  
30  
31  
32

### 33 **Implications for Research and Practice**

34  
35  
36 Our findings underscore the importance of the relational context in  
37  
38 understanding low sexual interest in both men and women. For women in particular,  
39  
40 the experience of sexual interest appears strongly linked with their perceptions of the  
41  
42 quality of their relationships, their communication with partners, and their  
43  
44 expectations/attitudes about sex. In the context of the recent FDA approval of  
45  
46 flibanserin, the first drug to treat low sexual desire in women (44), these findings are  
47  
48 relevant to the current debate about whether striving for a pharmaceutical solution to  
49  
50 women's sexual desire problems is an appropriate and feasible goal (45, 46). Some  
51  
52 authors have suggested that women with complaints of low sexual interest might  
53  
54  
55  
56  
57  
58  
59  
60



1  
2  
3 benefit most from integrative approaches that accord with a biopsychosocial model  
4  
5 (47).  
6

7  
8 Our findings on the strong association between open sexual communication  
9  
10 (i.e., “finding it always easy to talk about sex”) and a reduced likelihood of reporting  
11  
12 lack of interest in sex, particularly for women, emphasise the importance of providing  
13  
14 a broad sexual and relationships education, rather than limiting attention only to  
15  
16 adverse consequences of sex and how to prevent them. Similarly, the important role  
17  
18 of early sexual experiences, and sexual “competence,” especially for women, in  
19  
20 shaping later experiences of sexual desire supports the need for comprehensive sex  
21  
22 education.  
23  
24  
25

26  
27 In a clinical context, our findings emphasise the importance of health care  
28  
29 professionals assessing psychological and interpersonal variables in individuals  
30  
31 presenting with complaints of low sexual interest (48). In couple therapy, it is  
32  
33 important that therapists have an awareness of the differences between men and  
34  
35 women in the factors associated with low sexual interest. Lastly, our findings support  
36  
37 previous research on the critical role of physical and mental health in understanding  
38  
39 low sexual interest problems experienced by men and women (11, 18).  
40  
41  
42

### 43 **Conclusions**

44  
45 This study extends our understanding of the factors associated with lack of  
46  
47 interest in sex in men and women, the gender similarities and differences, and  
48  
49 highlights the need to assess and treat sexual desire problems in a holistic and  
50  
51 relationship- as well as gender-specific way.  
52  
53  
54  
55  
56  
57  
58  
59  
60

### Competing interests statement

AMJ has been a Governor of the Wellcome Trust since 2011. The remaining authors have nothing to disclose. Completed disclosure of interests form available to view online as supporting information.

### Contribution to authorship

The paper was conceived by CAG, CHM, AMJ, KW, and KRM. CAG wrote the first draft, with further contributions from all authors. Statistical analyses were undertaken by CHM, CT, and KGJ. CHM, AMJ (Principal Investigator) and KW, initial applicants on Natsal-3, wrote the study protocol and obtained funding. Natsal-3 questionnaire design, ethics applications, and piloting were undertaken by CHM, CT, AMJ, KW, and KRM. Data management was undertaken by NatCen Social Research, UCL and LSHTM. All authors contributed to data interpretation, reviewed successive drafts and approved the final version of the manuscript.

### Details of ethics approval

Natsal-3 was approved by the NRES Committee South Central-Oxford A (Ref: 10/H0604/27) on 12 July 2010. Participants provided oral informed consent for interviews.

### Funding statement

Natsal-3 was supported by grants from the U.K. Medical Research Council (G0701757) and the Wellcome Trust (084840), with support from the Economic and Social Research Council and the Department of Health. Since September 2015, KRM has been core funded by the UK Medical Research Council through the MRC/CSO Social & Public Health Sciences Unit, University of Glasgow [MC\_UU\_12017-11].

### Data sharing statement

The Natsal-3 dataset is publicly available from the UK Data Service: <https://discover.ukdataservice.ac.uk/>; SN: 7799; persistent identifier: 10.5255/UKDA-SN-77991-1.

## REFERENCES

1. Mitchell KR, Mercer CH, Ploubidis GB, et al. Sexual function in Britain: Findings from the third National Survey of Sexual Attitudes and Lifestyles (Natsal-3). *Lancet* 2013;382:1817-1829. doi 10.1016/S0140-6736(13)62366-1 [published Online First: 26 November 2013].
2. Mitchell KR, Jones KG, Wellings K, et al. Estimating the prevalence of sexual function problems: The impact of morbidity criteria. *J Sex Res* 2016;53:55-967. doi 10.1080/00224499.2015.1089214 [published Online First: 25 November 2015].
3. Brotto LA. The DSM diagnostic criteria for hypoactive sexual desire disorder in women. *Arch Sex Behav* 2010a; 39:221-239. doi 10.1007/s10508-009-9543-1 [published Online First: 24 September 2009].
4. Carvalho J, Nobre P. Biopsychosocial determinants of men's sexual desire: testing an integrative model. *J Sex Med* 2011;8:754-763. doi 10.1111/j.1743-6109.2010.02156.x [published Online First: 22 December 2010].
5. Štulhofer A, Carvalheira AA, Træen B. Is responsive sexual desire for partnered sex problematic among men? Insights from a two-country study. *Sex Relation Ther* 2013;28:246-258. doi 10.1080/14681994.2012.756137 [published Online First: 21 December 2012].
6. American Psychiatric Association. *Diagnostic and statistical manual of mental disorders*, 5th. ed. Arlington, VA: Author 2013.
7. Brotto LA. The DSM diagnostic criteria for hypoactive sexual desire disorder in men. *J Sex Med* 2010b;7:2015-2030. doi 10.1111/j.1743-6109.2010.01860.x [published Online First: 1 June 2010].

- 1  
2  
3 8. Corona G, Lee DM, Forti G, et al. Age-related changes in general and sexual health in  
4  
5 middle-aged and older men: Results from the European Male Ageing Study  
6  
7 (EMAS). *J Sex Med* 2010;7:1362-1380. doi 10.1111/j.1743-6109.2009.01601.x  
8  
9 [published Online First: 19 November 2009].  
10  
11
- 12 9. DeRogatis L, Rosen RC, Goldstein I, et al. Characterization of hypoactive sexual  
13  
14 desire disorder (HSDD) in men. *J Sex Med* 2012;9:812-820. doi 10.1111/j.1743-  
15  
16 6109.2011.02592.x [published Online First: 12 January 2012].  
17  
18
- 19 10. Carvalheira A, Træen B, Štulhofer A. Correlates of men's sexual interest: a cross-  
20  
21 cultural study. *J Sex Med* 2014;11:154-164. doi 10.1111/jsm.12345 [published  
22  
23 Online First: 28 October 2013].  
24  
25
- 26 11. Corona G, Petrone L, Mannucci E, et al. The impotent couple: low desire. *Int J*  
27  
28 *Androl* 2005;28:46-52. doi 10.1111/j.1365-2605.2005.00594.x [published  
29  
30 Online First: 18 October. 2005].  
31  
32
- 33 12. DeLamater JD, Sill M. Sexual desire in later life. *J Sex Res* 2005;42:138-149. doi  
34  
35 10.1080/00224490509552267 [published Online First: 11 January 2010].  
36  
37
- 38 13. Dennerstein L, Koochaki P, Barton I, et al. Hypoactive sexual desire disorder in  
39  
40 menopausal women: a survey of Western European women. *J Sex Med*  
41  
42 2006;3:212-222. doi 10.1111/j.1743-6109.2006.00215.x [published Online  
43  
44 First: 20 February 2006].  
45  
46
- 47 14. Hayes RD, Dennerstein L, Bennett CM, et al. Risk factors for female sexual  
48  
49 dysfunction in the general population: Exploring factors associated with low  
50  
51 sexual function and sexual distress. *J Sex Med* 2008;5:1681-1693. doi  
52  
53 10.1111/j.1743-6109.2008.00838.x [published Online First: 16 December  
54  
55 2015].  
56  
57  
58  
59  
60

- 1  
2  
3 15. McCabe MP, Goldhammer DL. Demographic and psychological factors related to  
4  
5 sexual desire among heterosexual women in a relationship. *J Sex Res*  
6  
7 2012;49:78-87. doi 10.1080/00224499.2011.569975 [published Online First: 28  
8  
9 April 2011].  
10  
11  
12 16. Öberg K, Sjögren Fugl-Meyer K. On Swedish women's distressing sexual  
13  
14 dysfunctions: some concomitant conditions and life satisfaction. *J Sex Med*  
15  
16 2005;2:169-180. doi 10.1111/j.1743-6109.2005.20226.x [published Online  
17  
18 First: 17 February 2005].  
19  
20  
21 17. Witting K, Santtila P, Varjonen M, et al. Female sexual dysfunction, sexual distress,  
22  
23 and compatibility with partner. *J Sex Med* 2008;5:2587-2599. doi  
24  
25 10.1111/j.1743-6109.2008.00984.x [published Online First: 27 August 2008]  
26  
27  
28 18. Shifren JL, Monz BU, Russo PA, et al. Sexual problems and distress in United States  
29  
30 women. *Obstet Gynecol* 2008;112:970-978. doi  
31  
32 10.1097/AOG.0b013e3181898cdb  
33  
34  
35 19. Johannes CB, Clayton AH, Odom DM, et al. Distressing sexual problems in United  
36  
37 States women revisited: prevalence after accounting for depression. *J Clin*  
38  
39 *Psychiatry* 2009;70:1698-1706. doi 10.4088/JCP.09m05390gry  
40  
41  
42 20. Erens B, Phelps A, Clifton S, et al. Methodology of the third British National Survey  
43  
44 of Sexual Attitudes and Lifestyles (Natsal-3). *Sex Transm Infect* 2014;90:84-89.  
45  
46 doi 10.1136/sextrans-2013-051359 [published Online First: 25 November  
47  
48 2013].  
49  
50  
51 21. Mercer CH, Tanton C, Prah P, et al. Changes in sexual attitudes and lifestyles in  
52  
53 Britain through the life course and over time: findings from the National  
54  
55 Surveys of Sexual Attitudes and Lifestyles (Natsal). *Lancet* 2013;382:1781-1794.  
56  
57  
58  
59  
60

- 1  
2  
3 doi 10.1016/S0140-6736(13)62035-8 [published Online First: 26 November  
4  
5 2013].  
6  
7  
8 22. Jones KG, Mitchell KR, Ploubidis GB, et al. The Natsal-SF measure of sexual  
9  
10 function: Comparison of three scoring methods. *J Sex Res* 2015;52:640-646. doi  
11  
12 10.1080/00224499.2014.985813 [published Online First: 10 February 2015].  
13  
14  
15 23. Mitchell KR, Ploubidis GB, Datta J, et al. The Natsal-SF: a validated measure of  
16  
17 sexual function for use in community surveys. *Eur J Epidemiol* 2012;27:409-18.  
18  
19 doi 10.1007/s10654-012-9697-3 [published Online First: 19 June 2012].  
20  
21  
22 24. Abdo CHN, Oliveira WM, Moreira ED, et al. Prevalence of sexual dysfunctions and  
23  
24 correlated conditions in a sample of Brazilian women—results of the Brazilian  
25  
26 study on sexual behavior (BSSB). *Int J Impot Res* 2004;16:160-166. doi  
27  
28 10.1038/sj.ijir.3901198 [published Online First: 12 February 2004].  
29  
30  
31 25. Hayes RD, Dennerstein L, Bennett CM, et al. Relationship between hypoactive  
32  
33 sexual desire disorder and aging. *Fertil Steril* 2007;87:107-112. doi  
34  
35 10.1016/j.fertnstert.2006.05.071 [published Online First: 1 November 2006].  
36  
37  
38 26. Peixoto MM, Nobre P. Prevalence and sociodemographic predictors of sexual  
39  
40 problems in Portugal: A population-based study with women aged 18 to 79  
41  
42 years. *J Sex Marital Ther* 2015;41:169-180. doi  
43  
44 10.1080/0092623X.2013.842195 [published Online First: 23 December 2013].  
45  
46  
47 27. Rosen RC, Shifren JL, Monz BU, et al. Correlates of sexually-related personal  
48  
49 distress in women with low sexual desire. *J Sex Med* 2009;6:1549-1560. doi  
50  
51 10.1111/j.1743-6109.2009.01252.x [published Online First: 30 March 2009].  
52  
53  
54 28. Laumann EO, Glasser DB, Neves RCS, et al. A population-based survey of sexual  
55  
56 activity, sexual problems and associated help-seeking behavior patterns in  
57  
58  
59  
60

- 1  
2  
3 mature adults in the United States of America. *Int J Impot Res* 2009;21:171-  
4  
5 178. doi 10.1038/ijir.2009.7 [published Online First: 26 February 2009].  
6  
7  
8 29. Eplov L, Giraldo A, Davidsen M, et al. Sexual desire in a nationally representative  
9  
10 Danish population. *J Sex Med* 2007;4:47-56. doi 10.1111/j.1743-  
11  
12 6109.2006.00396.x [published Online First: 3 January 2007].  
13  
14  
15 30. Mercer CH, Fenton KA, Johnson AM, et al. Who reports sexual function problems?  
16  
17 Empirical evidence from Britain's 2000 National Survey of Sexual Attitudes and  
18  
19 Lifestyles. *Sex Transm Infect* 2005;81:394-399. doi 10.1136/sti.2005.0151 49  
20  
21 [published Online First: 30 September 2005].  
22  
23  
24 31. Park A, Bryson C, Clery E, et al. *British social attitudes 30*. London: NatCen 2013.  
25  
26  
27 32. Bodenmann G, Ledermann T, Blattner D, et al. Associations among everyday  
28  
29 stress, critical life events, and sexual problems. *J of Nerv Ment Dis*  
30  
31 2006;194:494-501. doi 10.1097/01.nmd.0000228504.15569.b6  
32  
33  
34 33. Gerressu M, Mercer CH, Graham CA, et al. Prevalence of masturbation of  
35  
36 associated factors in a British national probability survey. *Arch Sex Behav*  
37  
38 2008;37:266-278. doi 10.1007/s10508-006-9123-6 [published Online First: 27  
39  
40 February 2007].  
41  
42  
43 34. Laumann EO, Paik A, Rosen RC. Sexual dysfunctions in the United States:  
44  
45 Prevalence and predictors. *JAMA* 1999;281:537-544. doi  
46  
47 10.1001/jama.281.6.537  
48  
49  
50 35. Janssen E, McBride KR, Yarber W, et al. Factors that influence sexual arousal in  
51  
52 men: A focus group study. *Arch Sex Behav* 2008;37:252-265. doi  
53  
54 10.1007/s10508-007-9245-5 [published Online First: 27 November 2007].  
55  
56  
57  
58  
59  
60

- 1  
2  
3 36. Murray S, Milhausen RR, Graham CA, et al. A qualitative exploration of factors that  
4  
5 affect sexual desire among men aged 30 to 65 in long-term relationships. *J Sex*  
6  
7 *Res* 2016;doi 10.1080/00224499.2016.1168352 doi  
8  
9 10.1080/00224499.2016.1168352 [published Online First: 2 May 2016].  
10  
11  
12 37. Çayan S, Bozlu M, Canpolat B, et al. The assessment of sexual functions in women  
13  
14 with male partners complaining of erectile dysfunction: does treatment of  
15  
16 male sexual dysfunction improve female partner's sexual functions? *J Sex*  
17  
18 *Marital Ther* 2004;30:333-341. doi 10.1080/00926230490465091 [published  
19  
20 Online First: 12 August 2010].  
21  
22  
23 38. Fisher WA, Rosen RC, Eardley I, et al. Experience of female partners of men with  
24  
25 erectile dysfunction: The female experience of men's attitudes to life events  
26  
27 and sexuality (FEMALES) study. *J Sex Med* 2005;2:675-668. doi 10.1111/j.1743-  
28  
29 6109.2005.00118.x [published Online First: 16 August 2005].  
30  
31  
32 39. Willoughby BJ, Farero AM, Busby DM. Exploring the effects of sexual desire  
33  
34 discrepancy among married couples. *Arch Sex Behav* 2014;43:551-562. doi  
35  
36 10.1007/s10508-013-0181-2 [published Online First: 18 September 2013].  
37  
38  
39 40. Hawes ZC, Wellings K, Stephenson J. First heterosexual intercourse in the United  
40  
41 Kingdom: A review of the literature. *J Sex Res* 2010;47:137-152. doi  
42  
43 10.1080/00224490903509399 [published Online First: 30 March 2010].  
44  
45  
46 41. Laumann EO, Nicolosi A, Glasser DB, et al. Sexual problems among women and  
47  
48 men aged 40–80 years: Prevalence and correlates identified in the Global Study  
49  
50 of Sexual Attitudes and Behaviors. *Int J Impot Res* 2005;17:39-57. doi  
51  
52 10.1038/sj.ijir.3901250 [published Online First: 24 June 2004].  
53  
54  
55 42. Park A, Clery E, Curtice J, et al. *British social attitudes: The 28th report*. London,  
56  
57  
58  
59  
60



- 1  
2  
3 England: NatCen 2012.  
4  
5  
6 43. Christensen BS, Grønbaek M, Osler M, et al. Sexual dysfunctions and difficulties in  
7  
8 Denmark: Prevalence and associated sociodemographic factors. *Arch Sex*  
9  
10 *Behav* 2011;40:121-132. doi 10.1007/s10508-010-9599-y [published Online  
11  
12 First: 19 February 2010].  
13  
14  
15 44. Woloshin S, Schwartz LM. US Food and Drug Administration approval of  
16  
17 flibanserin: Even the Score does not add up. *JAMA Intern Med* 2016; doi:  
18  
19 10.1001/jamainternmed.2016.0073 [published Online First: 29 February 2016].  
20  
21  
22 45. Graham CA, Boynton PM, Gould K. Women's sexual desire: Challenging narratives  
23  
24 of dysfunction. *Eur Psychol*, in press.  
25  
26  
27 46. Hart G, Wellings K. Sexual behaviour and its medicalisation: In sickness and in  
28  
29 health. *BMJ* 2002;324:896-900. doi 10.1136/bmj.324.7342.896 [published  
30  
31 Online First: 13 April 2002].  
32  
33  
34 47. Frühauf S, Gerger H, Schmidt HM, et al. Efficacy of psychological interventions for  
35  
36 sexual dysfunction: a systematic review and meta-analysis. *Arch Sex Behav*  
37  
38 2013;42:915-933. doi 10.1136/bmj.324.7342.896 [published Online First: 13  
39  
40 April 2002].  
41  
42  
43 48. Brotto LA, Atallah CS, Johnson-Agbakwu C, et al. Psychological and interpersonal  
44  
45 dimensions of sexual function and dysfunction. *J Sex Med* 2016;13:538-571. doi  
46  
47 10.1016/j.jsxm.2016.01.019 [published Online First: 25 March 2016].  
48  
49  
50 49. Payne RA, Abel GA. UK indices of multiple deprivation-a way to make comparisons  
51  
52 across constituent countries easier. *Health Stat Q* 2012;53:22-37. Retrieved  
53  
54 from <https://search.proquest.com/docview/1054966975?accountid=13963>  
55  
56  
57  
58  
59  
60

Table 1: Factors associated with lacking interest in having sex for at least 3 months in the past year in sexually active men and women

|                                                              | Men                         |              |                    |                    |             |                 | Women                       |              |                    |                    |             |                 | <i>p</i> -value for interaction with sex <sup>a</sup> |
|--------------------------------------------------------------|-----------------------------|--------------|--------------------|--------------------|-------------|-----------------|-----------------------------|--------------|--------------------|--------------------|-------------|-----------------|-------------------------------------------------------|
|                                                              | <i>Denom.</i><br>(unwt, wt) | %            | (95%CI)            | Age-adjusted<br>OR | (95%CI)     | <i>p</i> -value | <i>Denom.</i><br>(unwt, wt) | %            | (95%CI)            | Age-adjusted<br>OR | (95%CI)     | <i>p</i> -value |                                                       |
| <b>All</b>                                                   | <b>4839, 5973</b>           | <b>15.0%</b> | <b>(13.9-16.2)</b> |                    |             |                 | <b>6669, 5755</b>           | <b>34.2%</b> | <b>(32.8-35.5)</b> |                    |             |                 |                                                       |
| <b>Socio-demographics</b>                                    |                             |              |                    |                    |             |                 |                             |              |                    |                    |             |                 |                                                       |
| <b>Age group</b>                                             |                             |              |                    |                    |             | 0.0471          |                             |              |                    |                    |             | <0.0001         | 0.6733                                                |
| 16-24                                                        | 1279, 936                   | 11.5%        | (9.4-14.0)         | 1                  | -           |                 | 1662, 923                   | 24.8%        | (22.5-27.1)        | 1                  | -           |                 |                                                       |
| 25-34                                                        | 1376, 1238                  | 14.6%        | (12.7-16.6)        | 1.32               | (1.00-1.73) |                 | 2236, 1246                  | 31.9%        | (29.8-34.1)        | 1.42               | (1.22-1.66) |                 |                                                       |
| 35-44                                                        | 719, 1298                   | 17.2%        | (14.5-20.4)        | 1.61               | (1.19-2.18) |                 | 1050, 1290                  | 36.8%        | (33.7-40.1)        | 1.77               | (1.48-2.13) |                 |                                                       |
| 45-54                                                        | 630, 1186                   | 15.3%        | (12.5-18.7)        | 1.40               | (1.01-1.95) |                 | 871, 1186                   | 37.9%        | (34.5-41.5)        | 1.86               | (1.53-2.25) |                 |                                                       |
| 55-64                                                        | 512, 849                    | 16.5%        | (13.4-20.2)        | 1.53               | (1.10-2.13) |                 | 569, 755                    | 38.8%        | (34.5-43.2)        | 1.92               | (1.55-2.39) |                 |                                                       |
| 65-74                                                        | 323, 467                    | 13.9%        | (10.4-18.3)        | 1.22               | (0.81-1.82) |                 | 281, 355                    | 34.2%        | (28.4-40.5)        | 1.58               | (1.18-2.12) |                 |                                                       |
| <b>Index of multiple deprivation (quintiles)<sup>b</sup></b> |                             |              |                    |                    |             | 0.093           |                             |              |                    |                    |             | 0.0316          | 0.0111                                                |
| 1 (least deprived)                                           | 977, 1279                   | 13.9%        | (11.6-16.6)        | 1                  | -           |                 | 1248, 1208                  | 35.7%        | (32.6-38.9)        | 1                  | -           |                 |                                                       |
| 2                                                            | 962, 1264                   | 13.0%        | (10.8-15.6)        | 0.93               | (0.69-1.25) |                 | 1290, 1208                  | 33.6%        | (30.6-36.7)        | 0.92               | (0.76-1.13) |                 |                                                       |
| 3                                                            | 942, 1169                   | 18.0%        | (15.2-21.2)        | 1.38               | (1.04-1.85) |                 | 1299, 1116                  | 30.1%        | (27.2-33.2)        | 0.81               | (0.66-0.99) |                 |                                                       |
| 4                                                            | 967, 1184                   | 15.3%        | (12.8-18.3)        | 1.15               | (0.86-1.55) |                 | 1384, 1137                  | 35.9%        | (33.0-39.0)        | 1.08               | (0.89-1.30) |                 |                                                       |
| 5 (most deprived)                                            | 991, 1077                   | 15.1%        | (12.7-17.8)        | 1.14               | (0.85-1.52) |                 | 1448, 1086                  | 35.3%        | (32.4-38.3)        | 1.06               | (0.87-1.28) |                 |                                                       |
| <b>Education level<sup>c</sup></b>                           |                             |              |                    |                    |             | 0.0083          |                             |              |                    |                    |             | 0.2453          | 0.2914                                                |
| Left school aged 17+                                         | 2862, 3464                  | 13.5%        | (12.1-15.1)        | 1                  | -           |                 | 4150, 3406                  | 32.7%        | (31.0-34.5)        | 1                  | -           |                 |                                                       |
| Left school at 16                                            | 1873, 2437                  | 17.2%        | (15.3-19.4)        | 1.31               | (1.07-1.60) |                 | 2409, 2287                  | 36.6%        | (34.4-38.9)        | 1.08               | (0.95-1.23) |                 |                                                       |
| <b>Employment status</b>                                     |                             |              |                    |                    |             | 0.0086          |                             |              |                    |                    |             | 0.0003          | 0.0766                                                |
| Employed                                                     | 3211, 4254                  | 14.7%        | (13.3-16.1)        | 1                  | -           |                 | 3871, 3517                  | 34.6%        | (32.9-36.4)        | 1                  | -           |                 |                                                       |
| Full-time education                                          | 542, 431                    | 12.6%        | (8.8-17.5)         | 0.98               | (0.64-1.51) |                 | 693, 423                    | 22.5%        | (19.0-26.4)        | 0.70               | (0.55-0.89) |                 |                                                       |
| Unemployed                                                   | 707, 723                    | 19.6%        | (16.3-23.4)        | 1.44               | (1.12-1.86) |                 | 1681, 1282                  | 36.1%        | (33.4-39.0)        | 1.11               | (0.96-1.28) |                 |                                                       |
| Retired                                                      | 375, 562                    | 13.6%        | (10.4-17.7)        | 0.75               | (0.52-1.09) |                 | 415, 524                    | 35.8%        | (31.0-40.9)        | 0.75               | (0.57-0.99) |                 |                                                       |
| <b>Practises religion at least once a month</b>              |                             |              |                    |                    |             | 0.1687          |                             |              |                    |                    |             | 0.0082          | 0.9966                                                |
| No                                                           | 4283, 5179                  | 15.3%        | (14.1-16.6)        | 1                  | -           |                 | 5659, 4754                  | 34.8%        | (33.3-36.3)        | 1                  | -           |                 |                                                       |
| Yes                                                          | 521, 748                    | 12.9%        | (10.0-16.4)        | 0.81               | (0.60-1.09) |                 | 956, 945                    | 30.7%        | (27.5-34.2)        | 0.79               | (0.67-0.94) |                 |                                                       |

Table 1 cont.

|                                                                 | Men                         |       |             |                 |             |                 | Women                       |       |             |                 |             |                 | <i>p</i> -value for interaction with sex <sup>a</sup> |
|-----------------------------------------------------------------|-----------------------------|-------|-------------|-----------------|-------------|-----------------|-----------------------------|-------|-------------|-----------------|-------------|-----------------|-------------------------------------------------------|
|                                                                 | <i>Denom.</i><br>(unwt, wt) | %     | (95%CI)     | Age-adjusted OR | (95%CI)     | <i>p</i> -value | <i>Denom.</i><br>(unwt, wt) | %     | (95%CI)     | Age-adjusted OR | (95%CI)     | <i>p</i> -value |                                                       |
| <b>Health</b>                                                   |                             |       |             |                 |             |                 |                             |       |             |                 |             |                 |                                                       |
| <b>Self-reported general health</b>                             |                             |       |             |                 |             | <0.0001         |                             |       |             |                 |             | <0.0001         | 0.1890                                                |
| Very good/Good                                                  | 4123, 5055                  | 13.4% | (12.2-14.6) | 1               | -           |                 | 5683, 4851                  | 32.3% | (30.9-33.8) | 1               | -           |                 |                                                       |
| Fair                                                            | 580, 745                    | 21.9% | (18.3-25.8) | 1.8             | (1.41-2.30) |                 | 780, 709                    | 42.2% | (38.2-46.3) | 1.45            | (1.21-1.75) |                 |                                                       |
| Bad/very bad                                                    | 135, 171                    | 33.9% | (25.3-43.6) | 3.29            | (2.14-5.06) |                 | 206, 195                    | 49.9% | (42.2-57.7) | 1.93            | (1.40-2.67) |                 |                                                       |
| <b>Difficulty walking up stairs because of a health problem</b> |                             |       |             |                 |             | <0.0001         |                             |       |             |                 |             | 0.0497          | 0.1179                                                |
| No difficulty                                                   | 4475, 5460                  | 14.1% | (12.9-15.3) | 1               | -           |                 | 6062, 5107                  | 33.3% | (31.8-34.7) | 1               | -           |                 |                                                       |
| Some difficulty                                                 | 278, 393                    | 23.0% | (18.1-28.8) | 1.8             | (1.30-2.49) |                 | 450, 482                    | 39.2% | (34.4-44.2) | 1.15            | (0.92-1.43) |                 |                                                       |
| Much difficulty/unable to do this                               | 86, 120                     | 30.9% | (20.9-43.0) | 2.68            | (1.57-4.57) |                 | 157, 166                    | 47.0% | (38.0-56.1) | 1.55            | (1.06-2.25) |                 |                                                       |
| <b>Longstanding illness or disability</b>                       |                             |       |             |                 |             | <0.0001         |                             |       |             |                 |             | <0.0001         | 0.1348                                                |
| No                                                              | 3585, 4259                  | 12.8% | (11.6-14.2) | 1               | -           |                 | 4843, 4026                  | 31.6% | (30.0-33.2) | 1               | -           |                 |                                                       |
| Yes                                                             | 1253, 1713                  | 20.5% | (18.1-23.1) | 1.76            | (1.44-2.16) |                 | 1825, 1729                  | 40.1% | (37.5-42.8) | 1.35            | (1.17-1.55) |                 |                                                       |
| <b>Number of comorbid conditions<sup>d</sup></b>                |                             |       |             |                 |             | <0.0001         |                             |       |             |                 |             | <0.0001         | 0.7951                                                |
| 0                                                               | 3453, 3994                  | 12.8% | (11.5-14.1) | 1               | -           |                 | 4357, 3536                  | 29.9% | (28.2-31.5) | 1               | -           |                 |                                                       |
| 1                                                               | 939, 1329                   | 18.9% | (16.2-21.9) | 1.64            | (1.30-2.06) |                 | 1555, 1416                  | 38.6% | (35.9-41.5) | 1.42            | (1.23-1.64) |                 |                                                       |
| >=2                                                             | 446, 650                    | 21.0% | (17.0-25.6) | 1.91            | (1.41-2.60) |                 | 755, 802                    | 45.1% | (41.2-49.1) | 1.75            | (1.45-2.13) |                 |                                                       |
| <b>Depressive symptoms<sup>e</sup></b>                          |                             |       |             |                 |             | <0.0001         |                             |       |             |                 |             | <0.0001         | 0.6249                                                |
| No                                                              | 4383, 5471                  | 13.5% | (12.4-14.8) | 1               | -           |                 | 5885, 5149                  | 31.7% | (30.2-33.1) | 1               | -           |                 |                                                       |
| Yes                                                             | 449, 495                    | 31.3% | (26.4-36.7) | 2.95            | (2.26-3.85) |                 | 780, 602                    | 55.2% | (51.0-59.5) | 2.79            | (2.32-3.37) |                 |                                                       |
| <b>Treated for depression in the past year</b>                  |                             |       |             |                 |             | <0.0001         |                             |       |             |                 |             | <0.0001         | 0.2447                                                |
| No                                                              | 4524, 5630                  | 14.0% | (12.9-15.2) | 1               | -           |                 | 5770, 5040                  | 31.7% | (30.2-33.2) | 1               | -           |                 |                                                       |
| Yes                                                             | 313, 342                    | 31.5% | (25.7-38.0) | 2.82            | (2.08-3.83) |                 | 897, 713                    | 51.4% | (47.6-55.2) | 2.32            | (1.96-2.75) |                 |                                                       |

Table 1 cont.

|                                                      |                | Men                                  |       |             |                 |             | Women                                |       |             |                 |             | <i>p</i> -value for interaction with sex <sup>a</sup> |                 |
|------------------------------------------------------|----------------|--------------------------------------|-------|-------------|-----------------|-------------|--------------------------------------|-------|-------------|-----------------|-------------|-------------------------------------------------------|-----------------|
|                                                      |                | <i>Denom.</i><br>( <i>unwt, wt</i> ) | %     | (95%CI)     | Age-adjusted OR | (95%CI)     | <i>Denom.</i><br>( <i>unwt, wt</i> ) | %     | (95%CI)     | Age-adjusted OR | (95%CI)     |                                                       | <i>p</i> -value |
| <b>Menopausal status</b>                             |                |                                      |       |             |                 |             |                                      |       |             |                 |             |                                                       | 0.9326          |
|                                                      | Not menopausal |                                      |       |             |                 |             | 5485, 4187                           | 32.3% | (30.9-33.8) | 1               | -           |                                                       |                 |
|                                                      | Menopausal     |                                      |       |             |                 |             | 1167, 1548                           | 38.9% | (36.0-41.9) | 0.99            | (0.79-1.24) |                                                       |                 |
| <b>Circumcised</b>                                   |                |                                      |       |             |                 |             |                                      |       |             |                 |             |                                                       | 0.5951          |
|                                                      | No             | 3909, 4728                           | 15.1% | (13.8-16.4) | 1               | -           |                                      |       |             |                 |             |                                                       |                 |
|                                                      | Yes            | 857, 1166                            | 14.5% | (12.0-17.4) | 0.94            | (0.73-1.20) |                                      |       |             |                 |             |                                                       |                 |
| <b>Sexual behaviour</b>                              |                |                                      |       |             |                 |             |                                      |       |             |                 |             |                                                       |                 |
| <b>Number of occasions of sex, past 4 weeks</b>      |                |                                      |       |             |                 |             |                                      |       |             |                 |             |                                                       | <0.0001         |
|                                                      | 0              | 1013, 1163                           | 20.7% | (17.8-23.8) | 1               | -           | 1408, 1245                           | 42.9% | (39.9-45.9) | 1               | -           | <0.0001                                               | 0.4778          |
|                                                      | 1-2            | 1160, 1566                           | 18.7% | (16.2-21.5) | 0.89            | (0.69-1.14) | 1481, 1373                           | 39.6% | (36.7-42.5) | 0.89            | (0.75-1.05) |                                                       |                 |
|                                                      | 3-4            | 870, 1168                            | 12.4% | (10.1-15.1) | 0.54            | (0.41-0.73) | 1240, 1130                           | 33.8% | (30.7-37.0) | 0.7             | (0.58-0.85) |                                                       |                 |
|                                                      | 5+             | 1617, 1869                           | 9.2%  | (7.8-11.0)  | 0.39            | (0.30-0.51) | 2078, 1655                           | 22.6% | (20.5-24.8) | 0.41            | (0.34-0.49) |                                                       |                 |
| <b>Masturbation, past 4 weeks</b>                    |                |                                      |       |             |                 |             |                                      |       |             |                 |             |                                                       | 0.0458          |
|                                                      | No             | 1297, 1828                           | 13.7% | (11.8-15.8) | 1               | -           | 4032, 3612                           | 36.0% | (34.3-37.7) | 1               | -           | 0.0038                                                | 0.0005          |
|                                                      | Yes            | 3531, 4132                           | 15.6% | (14.2-17.0) | 1.24            | (1.00-1.52) | 2615, 2114                           | 30.8% | (28.7-33.0) | 0.83            | (0.73-0.94) |                                                       |                 |
| <b>No. of sexual partners, past year<sup>f</sup></b> |                |                                      |       |             |                 |             |                                      |       |             |                 |             |                                                       | 0.5348          |
|                                                      | 1              | 3573, 4824                           | 15.0% | (13.7-16.3) | 1               | -           | 5440, 5012                           | 35.3% | (33.8-36.8) | 1               | -           | 0.0038                                                | 0.0183          |
|                                                      | 2              | 539, 513                             | 16.2% | (12.9-20.3) | 1.14            | (0.86-1.52) | 570, 364                             | 28.2% | (23.9-32.8) | 0.80            | (0.63-1.01) |                                                       |                 |
|                                                      | 3+             | 718, 627                             | 13.6% | (11.1-16.6) | 0.94            | (0.72-1.22) | 642, 366                             | 24.8% | (21.0-29.0) | 0.70            | (0.56-0.88) |                                                       |                 |
| <b>Paid for sex, past year</b>                       |                |                                      |       |             |                 |             |                                      |       |             |                 |             |                                                       | 0.7167          |
|                                                      | No             | 4774, 5896                           | 15.0% | (13.9-16.2) | 1               | -           |                                      |       |             |                 |             |                                                       |                 |
|                                                      | Yes            | 64, 75                               | 13.4% | (6.8-24.7)  | 0.87            | (0.41-1.84) |                                      |       |             |                 |             |                                                       |                 |
| <b>Ever taken drugs to assist sexual performance</b> |                |                                      |       |             |                 |             |                                      |       |             |                 |             |                                                       | 0.0175          |
|                                                      | No             | 4188, 5180                           | 14.4% | (13.2-15.7) | 1               | -           | 6478, 5624                           | 34.0% | (32.6-35.4) | 1               | -           | 0.0666                                                | 0.8967          |
|                                                      | Yes            | 636, 776                             | 19.0% | (15.7-22.8) | 1.36            | (1.06-1.76) | 184, 124                             | 40.0% | (32.0-48.5) | 1.39            | (0.98-1.96) |                                                       |                 |

Table 1 cont.

|                                                                            | Men                                  |       |             |                    |             |                 | Women                                |       |             |                    |             |                 | <i>p</i> -value for interaction with sex <sup>a</sup> |
|----------------------------------------------------------------------------|--------------------------------------|-------|-------------|--------------------|-------------|-----------------|--------------------------------------|-------|-------------|--------------------|-------------|-----------------|-------------------------------------------------------|
|                                                                            | <i>Denom.</i><br>( <i>unwt, wt</i> ) | %     | (95%CI)     | Age-adjusted<br>OR | (95%CI)     | <i>p</i> -value | <i>Denom.</i><br>( <i>unwt, wt</i> ) | %     | (95%CI)     | Age-adjusted<br>OR | (95%CI)     | <i>p</i> -value |                                                       |
| <b>Relationship context</b>                                                |                                      |       |             |                    |             |                 |                                      |       |             |                    |             |                 |                                                       |
| <b>Relationship status</b>                                                 |                                      |       |             |                    |             | 0.0383          |                                      |       |             |                    |             | <0.0001         | 0.0001                                                |
| Living with partner                                                        | 2708, 4266                           | 15.5% | (14.1-17.1) | 1                  | -           |                 | 3967, 4168                           | 37.9% | (36.3-39.7) | 1                  | -           |                 |                                                       |
| In a steady relationship, not living together                              | 947, 760                             | 12.0% | (9.6-14.8)  | 0.76               | (0.57-1.00) |                 | 1360, 790                            | 22.6% | (20.2-25.2) | 0.51               | (0.43-0.60) |                 |                                                       |
| Not in a steady relationship, but previously cohabited                     | 446, 388                             | 18.2% | (14.6-22.5) | 1.22               | (0.91-1.62) |                 | 752, 462                             | 28.9% | (25.4-32.8) | 0.68               | (0.56-0.83) |                 |                                                       |
| Not in a steady relationship, never cohabited                              | 727, 551                             | 12.4% | (9.9-15.5)  | 0.8                | (0.58-1.09) |                 | 580, 330                             | 21.3% | (17.6-25.5) | 0.49               | (0.38-0.63) |                 |                                                       |
| <b>Duration of most recent sexual relationship</b>                         |                                      |       |             |                    |             | 0.494           |                                      |       |             |                    |             | <0.0001         | <0.0001                                               |
| 1 year or less                                                             | 1462, 1260                           | 13.0% | (11.0-15.3) | 1                  | -           |                 | 1597, 998                            | 21.5% | (19.1-24.1) | 1                  | -           |                 |                                                       |
| Between 1 and 5 years                                                      | 1247, 1227                           | 15.3% | (13.2-17.7) | 1.21               | (0.94-1.55) |                 | 1758, 1148                           | 28.5% | (26.1-31.0) | 1.45               | (1.20-1.76) |                 |                                                       |
| Between 5 and 15 years                                                     | 1065, 1484                           | 14.9% | (12.6-17.5) | 1.14               | (0.86-1.50) |                 | 1774, 1458                           | 39.8% | (37.2-42.4) | 2.37               | (1.96-2.86) |                 |                                                       |
| Over 15 years                                                              | 1004, 1904                           | 16.1% | (13.9-18.7) | 1.19               | (0.87-1.63) |                 | 1445, 2036                           | 40.0% | (37.3-42.7) | 2.31               | (1.84-2.91) |                 |                                                       |
| <b>Always easy to talk about sex with partners<sup>e</sup></b>             |                                      |       |             |                    |             | 0.0001          |                                      |       |             |                    |             | <0.0001         | 0.0182                                                |
| Yes                                                                        | 1695, 1899                           | 11.5% | (9.7-13.5)  | 1                  | -           |                 | 1746, 1451                           | 22.6% | (20.4-25.1) | 1                  | -           |                 |                                                       |
| No/other                                                                   | 3122, 4048                           | 16.7% | (15.3-18.2) | 1.53               | (1.23-1.90) |                 | 4907, 4289                           | 38.0% | (36.4-39.6) | 2.06               | (1.77-2.39) |                 |                                                       |
| <b>Happy with relationship<sup>h</sup></b>                                 |                                      |       |             |                    |             | <0.0001         |                                      |       |             |                    |             | <0.0001         | 0.8679                                                |
| Yes                                                                        | 1951, 2791                           | 12.6% | (11.0-14.4) | 1                  | -           |                 | 2736, 2601                           | 31.5% | (29.5-33.6) | 1                  | -           |                 |                                                       |
| Other                                                                      | 995, 1430                            | 21.0% | (18.4-23.9) | 1.85               | (1.47-2.32) |                 | 1640, 1617                           | 45.4% | (42.7-48.1) | 1.79               | (1.55-2.08) |                 |                                                       |
| <b>Participant does not share same level of interest in sex as partner</b> |                                      |       |             |                    |             | 0.2339          |                                      |       |             |                    |             | <0.0001         | <0.0001                                               |
| No/other                                                                   | 2270, 3233                           | 15.0% | (13.4-16.7) | 1                  | -           |                 | 3211, 3064                           | 27.2% | (25.4-29.0) | 1                  | -           |                 |                                                       |
| Yes                                                                        | 676, 988                             | 17.1% | (14.2-20.4) | 1.17               | (0.90-1.51) |                 | 1166, 1155                           | 62.5% | (59.2-65.7) | 4.57               | (3.87-5.38) |                 |                                                       |

Table 1 cont.

1  
2  
3  
4  
5  
6  
7  
8  
9  
10  
11  
12  
13  
14  
15  
16  
17  
18  
19  
20  
21  
22  
23  
24  
25  
26  
27  
28  
29  
30  
31  
32  
33  
34  
35  
36  
37  
38  
39  
40  
41  
42  
43  
44  
45  
46  
47  
48  
49

|                                                                               | Men                      |       |             |                 |             |         | Women                    |       |             |                 |             |         | <i>p-value for interaction with sex<sup>a</sup></i> |
|-------------------------------------------------------------------------------|--------------------------|-------|-------------|-----------------|-------------|---------|--------------------------|-------|-------------|-----------------|-------------|---------|-----------------------------------------------------|
|                                                                               | <i>Denom. (unwt, wt)</i> | %     | (95%CI)     | Age-adjusted OR | (95%CI)     | p-value | <i>Denom. (unwt, wt)</i> | %     | (95%CI)     | Age-adjusted OR | (95%CI)     | p-value |                                                     |
| <b>Participant does not share same sexual likes &amp; dislikes as partner</b> |                          |       |             |                 |             | 0.4188  |                          |       |             |                 |             | <0.0001 | <0.0001                                             |
| No/other                                                                      | 2650, 3803               | 15.3% | (13.8-16.9) | 1               | -           |         | 4079, 3908               | 34.9% | (33.3-36.6) | 1               | -           |         |                                                     |
| Yes                                                                           | 296, 418                 | 17.3% | (13.0-22.5) | 1.16            | (0.81-1.66) |         | 297, 310                 | 61.0% | (54.6-67.2) | 2.91            | (2.22-3.83) |         |                                                     |
| <b>Partner experienced sexual difficulties in past year</b>                   |                          |       |             |                 |             | 0.0136  |                          |       |             |                 |             | <0.0001 | 0.4140                                              |
| No/other                                                                      | 2431, 3454               | 14.6% | (13.1-16.2) | 1               | -           |         | 3726, 3498               | 34.8% | (33.1-36.6) | 1               | -           |         |                                                     |
| Yes                                                                           | 513, 763                 | 19.4% | (15.8-23.6) | 1.41            | (1.07-1.86) |         | 649, 719                 | 46.8% | (42.5-51.1) | 1.60            | (1.32-1.94) |         |                                                     |
| <b>Does not feel emotionally close to partner when have sex</b>               |                          |       |             |                 |             | 0.0006  |                          |       |             |                 |             | <0.0001 | 0.5972                                              |
| No/other                                                                      | 2904, 4165               | 15.1% | (13.7-16.6) | 1               | -           |         | 4263, 4108               | 35.9% | (34.3-37.6) | 1               | -           |         |                                                     |
| Yes                                                                           | 42, 56                   | 39.9% | (23.6-58.8) | 3.74            | (1.76-7.93) |         | 112, 109                 | 73.0% | (62.8-81.3) | 4.80            | (2.99-7.69) |         |                                                     |
| <b>Lifestyle</b>                                                              |                          |       |             |                 |             |         |                          |       |             |                 |             |         |                                                     |
| <b>1+ child(ren) aged &lt;5 in household</b>                                  |                          |       |             |                 |             | 0.9088  |                          |       |             |                 |             | <0.0001 | 0.0216                                              |
| No, none                                                                      | 4100, 5015               | 15.2% | (13.9-16.5) | 1               | -           |         | 4997, 4671               | 33.1% | (31.6-34.6) | 1               | -           |         |                                                     |
| Yes, 1+                                                                       | 727, 941                 | 14.5% | (11.9-17.6) | 0.98            | (0.76-1.28) |         | 1664, 1074               | 38.6% | (36.0-41.4) | 1.55            | (1.34-1.79) |         |                                                     |
| <b>Pregnant in the last year</b>                                              |                          |       |             |                 |             |         |                          |       |             |                 |             | 0.0114  |                                                     |
| No                                                                            |                          |       |             |                 |             |         | 4227, 4122               | 36.2% | (34.6-37.9) | 1               | -           |         |                                                     |
| Yes                                                                           |                          |       |             |                 |             |         | 437, 273                 | 41.7% | (36.6-47.1) | 1.36            | (1.07-1.72) |         |                                                     |
| <b>Used hormonal contraceptive, past year</b>                                 |                          |       |             |                 |             |         |                          |       |             |                 |             | 0.05    |                                                     |
| No                                                                            |                          |       |             |                 |             |         | 3759, 3838               | 34.8% | (33.1-36.5) | 1               | -           |         |                                                     |
| Yes                                                                           |                          |       |             |                 |             |         | 2806, 1831               | 33.0% | (30.9-35.1) | 1.15            | (1.00-1.33) |         |                                                     |
| <b>Sexual health indicators</b>                                               |                          |       |             |                 |             |         |                          |       |             |                 |             |         |                                                     |
| <b>Ever diagnosed with a sexually transmitted infection</b>                   |                          |       |             |                 |             | <0.0001 |                          |       |             |                 |             | 0.0004  | 0.0651                                              |
| No (or only thrush)                                                           | 4147, 5127               | 14.0% | (12.8-15.3) | 1               | -           |         | 5455, 4861               | 33.4% | (31.9-34.9) | 1               | -           |         |                                                     |
| Yes (excluding thrush)                                                        | 677, 830                 | 21.4% | (18.1-25.0) | 1.67            | (1.33-2.10) |         | 1206, 888                | 38.2% | (35.1-41.5) | 1.32            | (1.13-1.54) |         |                                                     |

Table 1 cont.

|                                                                         | Men                         |       |             |                    |             |                 | Women                       |       |             |                    |             |                 | <i>p</i> -value for interaction with sex <sup>a</sup> |
|-------------------------------------------------------------------------|-----------------------------|-------|-------------|--------------------|-------------|-----------------|-----------------------------|-------|-------------|--------------------|-------------|-----------------|-------------------------------------------------------|
|                                                                         | <i>Denom.</i><br>(unwt, wt) | %     | (95%CI)     | Age-adjusted<br>OR | (95%CI)     | <i>p</i> -value | <i>Denom.</i><br>(unwt, wt) | %     | (95%CI)     | Age-adjusted<br>OR | (95%CI)     | <i>p</i> -value |                                                       |
| <b>Ever experienced non-volitional sex</b>                              |                             |       |             |                    |             | 0.0010          |                             |       |             |                    |             | <0.0001         | 0.3164                                                |
| No                                                                      | 4705, 5824                  | 14.7% | (13.6-16.0) | 1                  | -           |                 | 5815, 5055                  | 32.8% | (31.4-34.2) | 1                  | -           |                 |                                                       |
| Yes/Don't know                                                          | 133, 148                    | 26.1% | (18.9-34.9) | 2.07               | (1.34-3.18) |                 | 848, 695                    | 44.3% | (40.5-48.3) | 1.66               | (1.40-1.97) |                 |                                                       |
| <b>Sexual competence at first sex<sup>i</sup></b>                       |                             |       |             |                    |             | 0.0706          |                             |       |             |                    |             | <0.0001         | 0.1797                                                |
| Not competent                                                           | 2407, 3037                  | 16.2% | (14.6-17.9) | 1                  | -           |                 | 3438, 2927                  | 37.6% | (35.7-39.5) | 1                  | -           |                 |                                                       |
| Competent                                                               | 2302, 2784                  | 13.7% | (12.1-15.4) | 0.84               | (0.69-1.01) |                 | 3097, 2716                  | 30.3% | (28.4-32.3) | 0.73               | (0.65-0.83) |                 |                                                       |
| <b>Number of other sexual response problems experienced<sup>l</sup></b> |                             |       |             |                    |             | <0.0001         |                             |       |             |                    |             | <0.0001         | 0.0015                                                |
| 0                                                                       | 3208, 3945                  | 11.7% | (10.5-13.1) | 1                  | -           |                 | 4377, 3759                  | 25.3% | (23.8-26.9) | 1                  | -           |                 |                                                       |
| 1                                                                       | 1061, 1350                  | 10.9% | (9.0-13.2)  | 0.91               | (0.71-1.17) |                 | 1217, 1087                  | 34.8% | (31.7-38.0) | 1.55               | (1.32-1.82) |                 |                                                       |
| 2+                                                                      | 570, 678                    | 42.5% | (37.9-47.2) | 5.58               | (4.41-7.04) |                 | 1075, 909                   | 69.8% | (66.5-72.9) | 6.91               | (5.82-8.21) |                 |                                                       |
| <b>Attitudes</b>                                                        |                             |       |             |                    |             |                 |                             |       |             |                    |             |                 |                                                       |
| <b>People are under pressure to have sex</b>                            |                             |       |             |                    |             | 0.0115          |                             |       |             |                    |             | 0.0001          | 0.7970                                                |
| Else                                                                    | 1799, 2264                  | 13.1% | (11.4-15.0) | 1                  | -           |                 | 1851, 1570                  | 29.3% | (26.8-31.9) | 1                  | -           |                 |                                                       |
| Strongly agree/agree                                                    | 3038, 3707                  | 16.2% | (14.7-17.8) | 1.29               | (1.06-1.57) |                 | 4817, 4185                  | 36.0% | (34.4-37.6) | 1.34               | (1.16-1.54) |                 |                                                       |
| <b>People want less sex as they age</b>                                 |                             |       |             |                    |             | <0.0001         |                             |       |             |                    |             | <0.0001         | 0.9443                                                |
| Else                                                                    | 2943, 3472                  | 11.4% | (10.2-12.8) | 1                  | -           |                 | 4044, 3278                  | 27.8% | (26.2-29.4) | 1                  | -           |                 |                                                       |
| Strongly agree/agree                                                    | 1894, 2499                  | 20.0% | (18.0-22.2) | 1.93               | (1.61-2.32) |                 | 2624, 2477                  | 42.6% | (40.4-44.8) | 1.85               | (1.63-2.10) |                 |                                                       |
| <b>Men have a naturally higher sex drive than women</b>                 |                             |       |             |                    |             | <0.0001         |                             |       |             |                    |             | <0.0001         | <0.0001                                               |
| Else                                                                    | 2788, 3441                  | 18.0% | (16.4-19.7) | 1                  | -           |                 | 3351, 2830                  | 26.0% | (24.3-27.8) | 1                  | -           |                 |                                                       |
| Strongly agree/agree                                                    | 2049, 2530                  | 10.9% | (9.4-12.6)  | 0.56               | (0.46-0.68) |                 | 3317, 2925                  | 42.0% | (40.0-44.1) | 2.04               | (1.80-2.31) |                 |                                                       |
| <b>Too much sex in the media</b>                                        |                             |       |             |                    |             | 0.7069          |                             |       |             |                    |             | 0.1807          | 0.4835                                                |
| Else                                                                    | 1986, 2296                  | 14.6% | (12.8-16.6) | 1                  | -           |                 | 2091, 1618                  | 31.7% | (29.3-34.2) | 1                  | -           |                 |                                                       |
| Strongly agree/agree                                                    | 2851, 3675                  | 15.3% | (13.8-16.9) | 1.04               | (0.85-1.26) |                 | 4577, 4137                  | 35.1% | (33.5-36.8) | 1.10               | (0.96-1.26) |                 |                                                       |

Denominator is those aged 16-74 years with at least one partner in the past year. Unwt, unweighted; wt, weighted

1  
2  
3  
4  
5 <sup>a</sup> P-value for interaction to determine whether the magnitude of association between each variable and lack of interest in sex differs between men and women

6 <sup>b</sup> IMD is a multidimensional measure of area (neighbourhood)-level deprivation based on the participant's postcode. IMD scores for England, Scotland and Wales were adjusted before being  
7 combined and assigned to quintiles, using a method by Payne and Abel [49].

8 <sup>c</sup> Participants aged ≥17 years.

9 <sup>d</sup> Includes arthritis, heart attack, coronary heart disease, angina, other forms of heart disease, hypertension, stroke, diabetes, broken hip or pelvis, bone or hip replacement ever, backache  
10 lasting longer than 3 months, any other muscle or bone disease lasting longer than 3 months, depression, cancer and any thyroid condition treated in the past year.

11 <sup>e</sup> Participants were asked whether they had often been bothered by feeling down, depressed, or hopeless in the past 2 weeks, and whether they had often been bothered by little interest or  
12 pleasure in doing things in the past 2 weeks, using a validated two-question patient health questionnaire (PHQ-2).

13 <sup>f</sup> Opposite and/or same-sex partners

14 <sup>g</sup> Other means easy with a husband or wife or regular partner, but difficult with a new partner; easy with a new partner, but difficult with a husband or wife or regular partner; difficult with any  
15 partner, it depends, sometimes easy, and sometimes difficult.

16 <sup>h</sup> Participants were asked to rate how happy they were in their relationship from 1 (very happy) to 7 (very unhappy); responses of 1 or 2 were regarded as denoting participants who were happy  
17 with their relationship.

18 <sup>i</sup> A constructed variable to measure readiness, combining consensuality, autonomy of decision making, timing and use of effective contraception

19 <sup>j</sup> Sexual response problems (for at least 3 months in past year): lacked enjoyment in sex, felt anxious during sex, felt physical pain as a result of sex, felt no excitement or arousal during sex,  
20 difficulty in reaching climax, reached a climax more quickly than you would like, trouble getting or keep an erection (men), uncomfortably dry vagina (women)



Table 3: Associations between lack of interest in having sex for at least 3 months in the past year and other sexual response problems lasting 3 months or more in the past year, by sex

|                                                        | Men                         |             |                        |             |                  | Women        |         |                             |       |                        |      |                  |         |         |         |
|--------------------------------------------------------|-----------------------------|-------------|------------------------|-------------|------------------|--------------|---------|-----------------------------|-------|------------------------|------|------------------|---------|---------|---------|
|                                                        | Didn't lack interest in sex |             | Lacked interest in sex |             | AOR <sup>a</sup> | (95%CI)      | p-value | Didn't lack interest in sex |       | Lacked interest in sex |      | AOR <sup>a</sup> | (95%CI) | p-value |         |
| Denominators (unwt, wt)                                | 4126, 5077                  |             | 713, 897               |             |                  |              |         | 4540, 3790                  |       | 2129, 1965             |      |                  |         |         |         |
| <b>Lacked enjoyment in having sex</b>                  |                             |             |                        |             |                  |              |         |                             |       |                        |      |                  |         | <0.0001 | <0.0001 |
| No                                                     | 97.7%                       | (97.1-98.1) | 81.5%                  | (78.2-84.4) | 1                | -            | 95.9%   | (95.1-96.5)                 | 72.5% | (70.2-74.7)            | 1    | -                |         |         |         |
| Yes                                                    | 2.3%                        | (1.9-2.9)   | 18.5%                  | (15.6-21.8) | 9.78             | (7.11-13.46) | 4.1%    | (3.5-4.9)                   | 27.5% | (25.3-29.8)            | 8.95 | (7.28-11.01)     |         |         |         |
| <b>Felt anxious during sex</b>                         |                             |             |                        |             |                  |              |         |                             |       |                        |      |                  |         | <0.0001 | <0.0001 |
| No                                                     | 96.1%                       | (95.5-96.7) | 85.8%                  | (82.6-88.5) | 1                | -            | 97.3%   | (96.7-97.7)                 | 89.9% | (88.4-91.3)            | 1    | -                |         |         |         |
| Yes                                                    | 3.9%                        | (3.3-4.5)   | 14.2%                  | (11.5-17.4) | 4.16             | (3.08-5.62)  | 2.7%    | (2.3-3.3)                   | 10.1% | (8.7-11.6)             | 4.4  | (3.43-5.65)      |         |         |         |
| <b>Felt physical pain as a result of sex</b>           |                             |             |                        |             |                  |              |         |                             |       |                        |      |                  |         | 0.0213  | <0.0001 |
| No                                                     | 98.4%                       | (97.9-98.8) | 97.1%                  | (95.6-98.1) | 1                | -            | 95.7%   | (95.0-96.3)                 | 86.5% | (84.6-88.1)            | 1    | -                |         |         |         |
| Yes                                                    | 1.6%                        | (1.2-2.1)   | 2.9%                   | (1.9-4.4)   | 1.87             | (1.10-3.19)  | 4.3%    | (3.7-5.0)                   | 13.5% | (11.9-15.4)            | 3.55 | (2.83-4.45)      |         |         |         |
| <b>Felt no excitement or arousal during sex</b>        |                             |             |                        |             |                  |              |         |                             |       |                        |      |                  |         | <0.0001 | <0.0001 |
| No                                                     | 98.5%                       | (98.0-98.9) | 87.7%                  | (85.0-90.0) | 1                | -            | 97.5%   | (96.9-97.9)                 | 80.9% | (79.0-82.7)            | 1    | -                |         |         |         |
| Yes                                                    | 1.5%                        | (1.1-2.0)   | 12.3%                  | (10.0-15.0) | 9.21             | (6.33-13.40) | 2.5%    | (2.1-3.1)                   | 19.1% | (17.3-21.0)            | 9.16 | (7.16-11.70)     |         |         |         |
| <b>Difficulty in reaching climax</b>                   |                             |             |                        |             |                  |              |         |                             |       |                        |      |                  |         | <0.0001 | <0.0001 |
| No                                                     | 92.7%                       | (91.7-93.5) | 80.5%                  | (76.6-83.8) | 1                | -            | 88.3%   | (87.2-89.3)                 | 74.9% | (72.7-76.9)            | 1    | -                |         |         |         |
| Yes                                                    | 7.3%                        | (6.5-8.3)   | 19.5%                  | (16.2-23.4) | 3.08             | (2.37-3.99)  | 11.7%   | (10.7-12.8)                 | 25.1% | (23.1-27.3)            | 2.6  | (2.23-3.03)      |         |         |         |
| <b>Reached climax more quickly than you would like</b> |                             |             |                        |             |                  |              |         |                             |       |                        |      |                  |         | 0.0198  | 0.3658  |
| No                                                     | 85.6%                       | (84.3-86.9) | 82.0%                  | (78.7-85.0) | 1                | -            | 97.8%   | (97.2-98.2)                 | 97.5% | (96.7-98.1)            | 1    | -                |         |         |         |
| Yes                                                    | 14.4%                       | (13.1-15.7) | 18.0%                  | (15.0-21.3) | 1.32             | (1.05-1.68)  | 2.2%    | (1.8-2.8)                   | 2.5%  | (1.9-3.3)              | 1.18 | (0.82-1.69)      |         |         |         |
| <b>Trouble getting or keeping an erection</b>          |                             |             |                        |             |                  |              |         |                             |       |                        |      |                  |         | <0.0001 |         |
| no                                                     | 88.5%                       | (87.3-89.6) | 79.4%                  | (75.9-82.6) | 1                | -            |         |                             |       |                        |      |                  |         |         |         |
| yes                                                    | 11.5%                       | (10.4-12.7) | 20.6%                  | (17.4-24.1) | 1.97             | (1.55-2.51)  |         |                             |       |                        |      |                  |         |         |         |
| <b>Uncomfortably dry vagina</b>                        |                             |             |                        |             |                  |              |         |                             |       |                        |      |                  |         |         | <0.0001 |
| no                                                     |                             |             |                        |             |                  |              | 90.7%   | (89.5-91.7)                 | 80.1% | (77.9-82.1)            | 1    | -                |         |         |         |
| yes                                                    |                             |             |                        |             |                  |              | 9.3%    | (8.3-10.5)                  | 19.9% | (17.9-22.1)            | 2.28 | (1.89-2.76)      |         |         |         |

Denominator is those aged 16-74 years with at least one partner in the past year. Unwt, unweighted; wt, weighted

AOR comparing those lacking interest to those not

Table 2: Factors associated with lacking interest in having sex for at least 3 months in the past year and being distressed about it in sexually active men and women

|                                                              | Men                         |             |                  |                 |             |                 | Women                       |              |                    |                 |             |                 | <i>p</i> -value for interaction with sex <sup>a</sup> |
|--------------------------------------------------------------|-----------------------------|-------------|------------------|-----------------|-------------|-----------------|-----------------------------|--------------|--------------------|-----------------|-------------|-----------------|-------------------------------------------------------|
|                                                              | <i>Denom.</i><br>(unwt, wt) | %           | (95%CI)          | Age-adjusted OR | (95%CI)     | <i>p</i> -value | <i>Denom.</i><br>(unwt, wt) | %            | (95%CI)            | Age-adjusted OR | (95%CI)     | <i>p</i> -value |                                                       |
| <b>All</b>                                                   | <b>4839, 5973</b>           | <b>8.2%</b> | <b>(7.4-9.1)</b> |                 |             |                 | <b>6669, 5755</b>           | <b>20.8%</b> | <b>(19.6-22.0)</b> |                 |             |                 |                                                       |
| <b>Socio-demographics</b>                                    |                             |             |                  |                 |             |                 |                             |              |                    |                 |             |                 |                                                       |
| <b>Age group</b>                                             |                             |             |                  |                 |             | 0.0011          |                             |              |                    |                 |             | <0.0001         | 0.8971                                                |
| 16-24                                                        | 1279, 936                   | 4.8%        | (3.7-6.4)        | 1               | -           |                 | 1662, 923                   | 15.2%        | (13.4-17.3)        | 1               | -           |                 |                                                       |
| 25-34                                                        | 1376, 1238                  | 8.0%        | (6.7-9.5)        | 1.7             | (1.19-2.41) |                 | 2236, 1246                  | 20.9%        | (19.0-22.8)        | 1.47            | (1.22-1.76) |                 |                                                       |
| 35-44                                                        | 719, 1298                   | 9.6%        | (7.5-12.3)       | 2.09            | (1.40-3.13) |                 | 1050, 1290                  | 22.9%        | (20.3-25.7)        | 1.65            | (1.34-2.04) |                 |                                                       |
| 45-54                                                        | 630, 1186                   | 9.7%        | (7.4-12.6)       | 2.11            | (1.38-3.22) |                 | 871, 1186                   | 23.3%        | (20.4-26.6)        | 1.69            | (1.35-2.13) |                 |                                                       |
| 55-64                                                        | 512, 849                    | 9.4%        | (7.0-12.6)       | 2.04            | (1.30-3.21) |                 | 569, 755                    | 21.8%        | (18.3-25.8)        | 1.55            | (1.20-2.01) |                 |                                                       |
| 65-74                                                        | 323, 467                    | 5.5%        | (3.4-8.6)        | 1.13            | (0.65-1.99) |                 | 281, 355                    | 16.5%        | (12.4-21.7)        | 1.10            | (0.76-1.59) |                 |                                                       |
| <b>Index of multiple deprivation (quintiles)<sup>b</sup></b> |                             |             |                  |                 |             | 0.8339          |                             |              |                    |                 |             | 0.0938          | 0.4592                                                |
| 1 (least deprived)                                           | 977, 1279                   | 8.1%        | (6.2-10.4)       | 1               | -           |                 | 1248, 1208                  | 23.3%        | (20.7-26.1)        | 1               | -           |                 |                                                       |
| 2                                                            | 962, 1264                   | 7.4%        | (5.7-9.6)        | 0.92            | (0.62-1.36) |                 | 1290, 1208                  | 20.8%        | (18.2-23.5)        | 0.87            | (0.69-1.09) |                 |                                                       |
| 3                                                            | 942, 1169                   | 8.3%        | (6.4-10.6)       | 1.05            | (0.71-1.55) |                 | 1299, 1116                  | 19.6%        | (17.1-22.4)        | 0.82            | (0.65-1.03) |                 |                                                       |
| 4                                                            | 967, 1184                   | 8.8%        | (6.9-11.1)       | 1.14            | (0.78-1.66) |                 | 1384, 1137                  | 21.9%        | (19.3-24.7)        | 0.95            | (0.76-1.18) |                 |                                                       |
| 5 (most deprived)                                            | 991, 1077                   | 8.6%        | (6.7-10.9)       | 1.12            | (0.75-1.65) |                 | 1448, 1086                  | 18.2%        | (15.9-20.6)        | 0.75            | (0.60-0.94) |                 |                                                       |
| <b>Education level<sup>c</sup></b>                           |                             |             |                  |                 |             | 0.4958          |                             |              |                    |                 |             | 0.7324          | 0.4496                                                |
| Left school aged 17+                                         | 2862, 3464                  | 7.9%        | (6.8-9.2)        | 1               | -           |                 | 4150, 3406                  | 20.8%        | (19.4-22.4)        | 1               | -           |                 |                                                       |
| Left school at 16                                            | 1873, 2437                  | 8.8%        | (7.5-10.4)       | 1.09            | (0.85-1.41) |                 | 2409, 2287                  | 21.1%        | (19.3-23.1)        | 0.97            | (0.83-1.14) |                 |                                                       |
| <b>Employment status</b>                                     |                             |             |                  |                 |             | 0.0001          |                             |              |                    |                 |             | 0.0003          | 0.1244                                                |
| Employed                                                     | 3211, 4254                  | 8.3%        | (7.3-9.5)        | 1               | -           |                 | 3871, 3517                  | 21.6%        | (20.1-23.2)        | 1               | -           |                 |                                                       |
| Full-time education                                          | 542, 431                    | 4.9%        | (2.8-8.6)        | 0.74            | (0.38-1.44) |                 | 693, 423                    | 14.8%        | (11.8-18.4)        | 0.75            | (0.56-1.01) |                 |                                                       |
| Unemployed                                                   | 707, 723                    | 12.1%       | (9.5-15.3)       | 1.56            | (1.14-2.13) |                 | 1681, 1282                  | 22.3%        | (19.9-24.9)        | 1.07            | (0.90-1.27) |                 |                                                       |
| Retired                                                      | 375, 562                    | 4.9%        | (3.1-7.6)        | 0.41            | (0.23-0.71) |                 | 415, 524                    | 16.8%        | (13.4-20.8)        | 0.57            | (0.41-0.79) |                 |                                                       |
| <b>Practises religion at least once a month</b>              |                             |             |                  |                 |             | 0.1638          |                             |              |                    |                 |             | 0.0167          | 0.8143                                                |
| No                                                           | 4283, 5179                  | 8.5%        | (7.5-9.5)        | 1               | -           |                 | 5659, 4754                  | 21.5%        | (20.2-22.9)        | 1               | -           |                 |                                                       |

| Table 2 cont.                                                   |                                    |       |                |                                             |                |                |                                    |       |                |                                             |                |                |                                                                         |
|-----------------------------------------------------------------|------------------------------------|-------|----------------|---------------------------------------------|----------------|----------------|------------------------------------|-------|----------------|---------------------------------------------|----------------|----------------|-------------------------------------------------------------------------|
| Men                                                             |                                    |       |                |                                             |                |                | Women                              |       |                |                                             |                |                |                                                                         |
|                                                                 | <i>Denom.</i><br><i>(unwt, wt)</i> | %     | <i>(95%CI)</i> | <i>Age-</i><br><i>adjusted</i><br><i>OR</i> | <i>(95%CI)</i> | <i>p-value</i> | <i>Denom.</i><br><i>(unwt, wt)</i> | %     | <i>(95%CI)</i> | <i>Age-</i><br><i>adjusted</i><br><i>OR</i> | <i>(95%CI)</i> | <i>p-value</i> | <i>p-value for</i><br><i>interaction</i><br><i>with sex<sup>a</sup></i> |
| <b>Health</b>                                                   |                                    |       |                |                                             |                |                |                                    |       |                |                                             |                |                |                                                                         |
| <b>Self-reported general health</b>                             |                                    |       |                |                                             |                | <0.0001        |                                    |       |                |                                             |                | <0.0001        | 0.0969                                                                  |
| Very good/Good                                                  | 4123, 5055                         | 7.0%  | (6.1-7.9)      | 1                                           | -              |                | 5683, 4851                         | 19.2% | (18.0-20.5)    | 1                                           | -              |                |                                                                         |
| Fair                                                            | 580, 745                           | 13.3% | (10.5-16.8)    | 2.04                                        | (1.50-2.78)    |                | 780, 709                           | 27.9% | (24.3-31.9)    | 1.60                                        | (1.30-1.97)    |                |                                                                         |
| Bad/very bad                                                    | 135, 171                           | 22.6% | (15.3-32.1)    | 3.85                                        | (2.31-6.40)    |                | 206, 195                           | 33.4% | (26.3-41.4)    | 2.05                                        | (1.45-2.91)    |                |                                                                         |
| <b>Difficulty walking up stairs because of a health problem</b> |                                    |       |                |                                             |                | 0.0001         |                                    |       |                |                                             |                | 0.0085         | 0.1553                                                                  |
| No difficulty                                                   | 4475, 5460                         | 7.6%  | (6.7-8.6)      | 1                                           | -              |                | 6062, 5107                         | 20.1% | (18.9-21.4)    | 1                                           | -              |                |                                                                         |
| Some difficulty                                                 | 278, 393                           | 12.3% | (8.8-17.0)     | 1.67                                        | (1.11-2.52)    |                | 450, 482                           | 24.1% | (20.0-28.7)    | 1.21                                        | (0.93-1.59)    |                |                                                                         |
| Much difficulty/unable to do this                               | 86, 120                            | 22.2% | (13.5-34.2)    | 3.36                                        | (1.79-6.32)    |                | 157, 166                           | 32.3% | (24.3-41.5)    | 1.81                                        | (1.21-2.70)    |                |                                                                         |
| <b>Longstanding illness or disability</b>                       |                                    |       |                |                                             |                | <0.0001        |                                    |       |                |                                             |                | <0.0001        | 0.0345                                                                  |
| No                                                              | 3585, 4259                         | 6.5%  | (5.6-7.5)      | 1                                           | -              |                | 4843, 4026                         | 18.7% | (17.4-20.0)    | 1                                           | -              |                |                                                                         |
| Yes                                                             | 1253, 1713                         | 12.5% | (10.6-14.8)    | 2.09                                        | (1.60-2.74)    |                | 1825, 1729                         | 25.7% | (23.4-28.2)    | 1.48                                        | (1.27-1.74)    |                |                                                                         |
| <b>Number of comorbid conditions<sup>d</sup></b>                |                                    |       |                |                                             |                | <0.0001        |                                    |       |                |                                             |                | <0.0001        | 0.5779                                                                  |
| 0                                                               | 3453, 3994                         | 6.4%  | (5.5-7.5)      | 1                                           | -              |                | 4357, 3536                         | 17.3% | (15.9-18.7)    | 1                                           | -              |                |                                                                         |
| 1                                                               | 939, 1329                          | 11.0% | (9.0-13.4)     | 1.88                                        | (1.37-2.57)    |                | 1555, 1416                         | 24.1% | (21.7-26.7)    | 1.54                                        | (1.30-1.83)    |                |                                                                         |
| >=2                                                             | 446, 650                           | 13.3% | (10.1-17.4)    | 2.40                                        | (1.61-3.59)    |                | 755, 802                           | 30.5% | (26.8-34.4)    | 2.16                                        | (1.74-2.69)    |                |                                                                         |
| <b>Depressive symptoms<sup>e</sup></b>                          |                                    |       |                |                                             |                | <0.0001        |                                    |       |                |                                             |                | <0.0001        | 0.0370                                                                  |
| No                                                              | 4383, 5471                         | 6.8%  | (6.0-7.7)      | 1                                           | -              |                | 5885, 5149                         | 18.6% | (17.4-19.8)    | 1                                           | -              |                |                                                                         |
| Yes                                                             | 449, 495                           | 23.7% | (19.3-28.9)    | 4.36                                        | (3.20-5.94)    |                | 780, 602                           | 39.6% | (35.4-44.0)    | 2.94                                        | (2.41-3.59)    |                |                                                                         |
| <b>Treated for depression in the past year</b>                  |                                    |       |                |                                             |                | <0.0001        |                                    |       |                |                                             |                | <0.0001        | 0.0371                                                                  |
| No                                                              | 4524, 5630                         | 7.3%  | (6.5-8.2)      | 1                                           | -              |                | 5770, 5040                         | 18.5% | (17.3-19.8)    | 1                                           | -              |                |                                                                         |
| Yes                                                             | 313, 342                           | 23.0% | (17.9-29.1)    | 3.81                                        | (2.71-5.36)    |                | 897, 713                           | 36.4% | (32.9-40.2)    | 2.54                                        | (2.12-3.03)    |                |                                                                         |

Table 2 cont.

|                                                      |                | Men                         |       |            |                 |             | Women                       |       |             |                 |             | <i>p</i> -value for interaction with sex <sup>a</sup> |                 |
|------------------------------------------------------|----------------|-----------------------------|-------|------------|-----------------|-------------|-----------------------------|-------|-------------|-----------------|-------------|-------------------------------------------------------|-----------------|
|                                                      |                | <i>Denom.</i><br>(unwt, wt) | %     | (95%CI)    | Age-adjusted OR | (95%CI)     | <i>Denom.</i><br>(unwt, wt) | %     | (95%CI)     | Age-adjusted OR | (95%CI)     |                                                       | <i>p</i> -value |
| <b>Menopausal status</b>                             |                |                             |       |            |                 |             |                             |       |             |                 |             |                                                       | 0.9656          |
|                                                      | Not menopausal |                             |       |            |                 |             | 5485, 4187                  | 20.2% | (18.9-21.5) | 1               | -           |                                                       |                 |
|                                                      | Menopausal     |                             |       |            |                 |             | 1167, 1548                  | 22.5% | (20.0-25.2) | 1.01            | (0.76-1.32) |                                                       |                 |
| <b>Circumcised</b>                                   |                |                             |       |            |                 |             |                             |       |             |                 |             |                                                       | 0.4097          |
|                                                      | No             | 3909, 4728                  | 8.3%  | (7.4-9.4)  | 1               | -           |                             |       |             |                 |             |                                                       |                 |
|                                                      | Yes            | 857, 1166                   | 7.5%  | (5.7-9.9)  | 0.87            | (0.62-1.22) |                             |       |             |                 |             |                                                       |                 |
| <b>Sexual behaviour</b>                              |                |                             |       |            |                 |             |                             |       |             |                 |             |                                                       |                 |
| <b>Number of occasions of sex, past 4 weeks</b>      |                |                             |       |            |                 |             |                             |       |             |                 |             |                                                       | <0.0001         |
|                                                      |                |                             |       |            |                 |             |                             |       |             |                 |             | 1                                                     | 0.5496          |
|                                                      | 0              | 1013, 1163                  | 10.3% | (8.3-12.7) | 1               | -           | 1408, 1245                  | 23.2% | (20.7-26.0) | 1               | -           |                                                       |                 |
|                                                      | 1-2            | 1160, 1566                  | 10.5% | (8.6-12.8) | 1.02            | (0.74-1.42) | 1481, 1373                  | 24.2% | (21.8-26.9) | 1.06            | (0.87-1.30) |                                                       |                 |
|                                                      | 3-4            | 870, 1168                   | 7.4%  | (5.6-9.8)  | 0.71            | (0.48-1.04) | 1240, 1130                  | 21.3% | (18.7-24.2) | 0.91            | (0.73-1.13) |                                                       |                 |
|                                                      | 5+             | 1617, 1869                  | 5.0%  | (3.9-6.4)  | 0.46            | (0.33-0.66) | 2078, 1655                  | 14.7% | (12.9-16.7) | 0.58            | (0.47-0.72) |                                                       |                 |
| <b>Masturbation, past 4 weeks</b>                    |                |                             |       |            |                 |             |                             |       |             |                 |             |                                                       | 0.7265          |
|                                                      | No             | 1297, 1828                  | 6.9%  | (5.5-8.6)  | 1               | -           | 4032, 3612                  | 21.1% | (19.6-22.6) | 1               | -           |                                                       |                 |
|                                                      | Yes            | 3531, 4132                  | 8.8%  | (7.7-9.9)  | 1.42            | (1.07-1.88) | 2615, 2114                  | 20.3% | (18.4-22.2) | 0.97            | (0.84-1.13) |                                                       |                 |
| <b>No. of sexual partners, past year<sup>f</sup></b> |                |                             |       |            |                 |             |                             |       |             |                 |             |                                                       | 0.4744          |
|                                                      |                |                             |       |            |                 |             |                             |       |             |                 |             |                                                       | 0.2466          |
|                                                      | 1              | 3573, 4824                  | 8.5%  | (7.5-9.6)  | 1               | -           | 5440, 5012                  | 21.6% | (20.3-22.9) | 1               | -           |                                                       |                 |
|                                                      | 2              | 539, 513                    | 6.3%  | (4.3-9.1)  | 0.75            | (0.49-1.14) | 570, 364                    | 16.7% | (13.3-20.6) | 0.75            | (0.57-0.99) |                                                       |                 |
|                                                      | 3+             | 718, 627                    | 6.8%  | (5.1-9.0)  | 0.82            | (0.59-1.15) | 642, 366                    | 14.1% | (11.0-17.7) | 0.62            | (0.46-0.83) |                                                       |                 |
| <b>Paid for sex, past year</b>                       |                |                             |       |            |                 |             |                             |       |             |                 |             |                                                       | 0.4865          |
|                                                      | No             | 4774, 5896                  | 8.2%  | (7.4-9.2)  | 1               | -           |                             |       |             |                 |             |                                                       |                 |
|                                                      | Yes            | 64, 75                      | 5.6%  | (1.8-16.4) | 0.66            | (0.20-2.15) |                             |       |             |                 |             |                                                       |                 |
| <b>Ever taken drugs to assist sexual performance</b> |                |                             |       |            |                 |             |                             |       |             |                 |             |                                                       | 0.1055          |
|                                                      | No             | 4188, 5180                  | 7.6%  | (6.7-8.6)  | 1               | -           | 6478, 5624                  | 20.6% | (19.5-21.8) | 1               | -           |                                                       |                 |
|                                                      | Yes            | 636, 776                    | 12.1% | (9.5-15.4) | 1.63            | (1.19-2.23) | 184, 124                    | 25.9% | (19.2-33.9) | 1.38            | (0.93-2.05) |                                                       |                 |

Table 2 cont.

|                                                                            | Men                                  |       |             |                    |             |                 | Women                                |       |             |                    |             |                 | <i>p</i> -value for interaction with sex <sup>a</sup> |
|----------------------------------------------------------------------------|--------------------------------------|-------|-------------|--------------------|-------------|-----------------|--------------------------------------|-------|-------------|--------------------|-------------|-----------------|-------------------------------------------------------|
|                                                                            | <i>Denom.</i><br>( <i>unwt, wt</i> ) | %     | (95%CI)     | Age-adjusted<br>OR | (95%CI)     | <i>p</i> -value | <i>Denom.</i><br>( <i>unwt, wt</i> ) | %     | (95%CI)     | Age-adjusted<br>OR | (95%CI)     | <i>p</i> -value |                                                       |
| <b>Relationship context</b>                                                |                                      |       |             |                    |             |                 |                                      |       |             |                    |             |                 |                                                       |
| <b>Relationship status</b>                                                 |                                      |       |             |                    |             | 0.03            |                                      |       |             |                    |             | <0.0001         | 0.0307                                                |
| Living with partner                                                        | 2708, 4266                           | 8.8%  | (7.7-10.1)  | 1                  | -           |                 | 3967, 4168                           | 23.4% | (21.9-24.9) | 1                  | -           |                 |                                                       |
| In a steady relationship, not living together                              | 947, 760                             | 6.9%  | (5.3-9.0)   | 0.78               | (0.56-1.09) |                 | 1360, 790                            | 15.4% | (13.4-17.7) | 0.59               | (0.49-0.71) |                 |                                                       |
| Not in a steady relationship, but previously cohabited                     | 446, 388                             | 8.8%  | (6.2-12.2)  | 1.00               | (0.67-1.48) |                 | 752, 462                             | 13.6% | (11.1-16.6) | 0.51               | (0.40-0.66) |                 |                                                       |
| Not in a steady relationship, never cohabited                              | 727, 551                             | 4.7%  | (3.3-6.8)   | 0.52               | (0.34-0.81) |                 | 580, 330                             | 11.0% | (8.2-14.5)  | 0.39               | (0.28-0.55) |                 |                                                       |
| <b>Duration of most recent sexual relationship</b>                         |                                      |       |             |                    |             | 0.0143          |                                      |       |             |                    |             | <0.0001         | 0.0719                                                |
| 1 year or less                                                             | 1462, 1260                           | 5.5%  | (4.3-7.1)   | 1                  | -           |                 | 1597, 998                            | 11.2% | (9.4-13.2)  | 1                  | -           |                 |                                                       |
| Between 1 and 5 years                                                      | 1247, 1227                           | 9.0%  | (7.3-11.0)  | 1.67               | (1.18-2.36) |                 | 1758, 1148                           | 18.5% | (16.5-20.7) | 1.81               | (1.44-2.29) |                 |                                                       |
| Between 5 and 15 years                                                     | 1065, 1484                           | 9.3%  | (7.5-11.6)  | 1.68               | (1.17-2.43) |                 | 1774, 1458                           | 25.2% | (23.0-27.6) | 2.81               | (2.23-3.55) |                 |                                                       |
| Over 15 years                                                              | 1004, 1904                           | 8.8%  | (7.1-10.8)  | 1.47               | (0.97-2.22) |                 | 1445, 2036                           | 23.8% | (21.5-26.2) | 2.83               | (2.13-3.75) |                 |                                                       |
| <b>Always easy to talk about sex with partners<sup>e</sup></b>             |                                      |       |             |                    |             | 0               |                                      |       |             |                    |             | <0.0001         | 0.4854                                                |
| Yes                                                                        | 1695, 1899                           | 4.8%  | (3.8-6.0)   | 1                  | -           |                 | 1746, 1451                           | 11.4% | (9.7-13.2)  | 1                  | -           |                 |                                                       |
| No/other                                                                   | 3122, 4048                           | 9.8%  | (8.7-11.1)  | 2.15               | (1.62-2.87) |                 | 4907, 4289                           | 23.9% | (22.5-25.3) | 2.43               | (2.02-2.93) |                 |                                                       |
| <b>Happy with relationship<sup>h</sup></b>                                 |                                      |       |             |                    |             | <0.0001         |                                      |       |             |                    |             | <0.0001         | 0.9717                                                |
| Yes                                                                        | 1951, 2791                           | 7.1%  | (5.9-8.6)   | 1                  | -           |                 | 2736, 2601                           | 18.6% | (16.9-20.4) | 1                  | -           |                 |                                                       |
| Other                                                                      | 995, 1430                            | 13.3% | (11.2-15.8) | 2.01               | (1.51-2.66) |                 | 1640, 1617                           | 31.4% | (28.8-34.0) | 2.00               | (1.69-2.37) |                 |                                                       |
| <b>Participant does not share same level of interest in sex as partner</b> |                                      |       |             |                    |             |                 |                                      |       |             |                    |             | 0.0311          | <0.0001                                               |
| No/other                                                                   | 2270, 3233                           | 8.5%  | (7.2-10.0)  | 1                  | -           |                 | 3211, 3064                           | 15.0% | (13.6-16.4) | 1                  | -           |                 |                                                       |
| Yes                                                                        | 676, 988                             | 11.6% | (9.2-14.4)  | 1.41               | (1.03-1.92) |                 | 1166, 1155                           | 46.2% | (42.9-49.6) | 4.91               | (4.13-5.83) |                 |                                                       |

Table 2 cont.

|                                                                               |                          | Men        |         |                 |         |                | Women                    |       |             |                 |             | <i>p-value for interaction with sex<sup>a</sup></i> |                |
|-------------------------------------------------------------------------------|--------------------------|------------|---------|-----------------|---------|----------------|--------------------------|-------|-------------|-----------------|-------------|-----------------------------------------------------|----------------|
|                                                                               | <i>Denom. (unwt, wt)</i> | %          | (95%CI) | Age-adjusted OR | (95%CI) | <i>p-value</i> | <i>Denom. (unwt, wt)</i> | %     | (95%CI)     | Age-adjusted OR | (95%CI)     |                                                     | <i>p-value</i> |
| <b>Participant does not share same sexual likes &amp; dislikes as partner</b> |                          |            |         |                 |         |                |                          |       |             |                 |             |                                                     |                |
|                                                                               |                          |            |         |                 |         | 0.0975         |                          |       |             |                 |             | <0.0001                                             | 0.0212         |
|                                                                               | No/other                 | 2650, 3803 | 8.9%    | (7.7-10.2)      | 1       | -              | 4079, 3908               | 22.1% | (20.6-23.6) | 1               | -           |                                                     |                |
|                                                                               | Yes                      | 296, 418   | 12.2%   | (8.6-17.0)      | 1.43    | (0.94-2.18)    | 297, 310                 | 41.9% | (35.6-48.6) | 2.55            | (1.93-3.37) |                                                     |                |
| <b>Partner experienced sexual difficulties in past year</b>                   |                          |            |         |                 |         |                |                          |       |             |                 |             |                                                     |                |
|                                                                               |                          |            |         |                 |         | 0.0027         |                          |       |             |                 |             | <0.0001                                             | 0.6889         |
|                                                                               | No/other                 | 2431, 3454 | 8.3%    | (7.2-9.6)       | 1       | -              | 3726, 3498               | 22.1% | (20.6-23.7) | 1               | -           |                                                     |                |
|                                                                               | Yes                      | 513, 763   | 13.2%   | (10.2-17.0)     | 1.68    | (1.20-2.35)    | 649, 719                 | 30.4% | (26.5-34.6) | 1.58            | (1.27-1.95) |                                                     |                |
| <b>Does not feel emotionally close to partner when have sex</b>               |                          |            |         |                 |         |                |                          |       |             |                 |             |                                                     |                |
|                                                                               |                          |            |         |                 |         | 0.0225         |                          |       |             |                 |             | <0.0001                                             | 0.8228         |
|                                                                               | No/other                 | 2904, 4165 | 9.1%    | (7.9-10.3)      | 1       | -              | 4263, 4108               | 22.9% | (21.5-24.4) | 1               | -           |                                                     |                |
|                                                                               | Yes                      | 42, 56     | 21.0%   | (10.2-38.3)     | 2.69    | (1.15-6.29)    | 112, 109                 | 47.0% | (36.4-57.8) | 2.98            | (1.92-4.63) |                                                     |                |
| <b>Lifestyle</b>                                                              |                          |            |         |                 |         |                |                          |       |             |                 |             |                                                     |                |
| <b>1+ child(ren) aged &lt;5 in household</b>                                  |                          |            |         |                 |         |                |                          |       |             |                 |             |                                                     |                |
|                                                                               |                          |            |         |                 |         | 0.1047         |                          |       |             |                 |             | 0.0004                                              | 0.0042         |
|                                                                               | No, none                 | 4100, 5015 | 8.6%    | (7.6-9.6)       | 1       | -              | 4997, 4671               | 20.2% | (18.9-21.5) | 1               | -           |                                                     |                |
|                                                                               | Yes, 1+                  | 727, 941   | 6.3%    | (4.6-8.5)       | 0.75    | (0.52-1.06)    | 1664, 1074               | 23.5% | (21.2-25.9) | 1.34            | (1.14-1.58) |                                                     |                |
| <b>Pregnant in the last year</b>                                              |                          |            |         |                 |         |                |                          |       |             |                 |             |                                                     |                |
|                                                                               |                          |            |         |                 |         |                |                          |       |             |                 |             | 0.5927                                              |                |
|                                                                               | No                       |            |         |                 |         |                | 4227, 4122               | 21.8% | (20.4-23.4) | 1               | -           |                                                     |                |
|                                                                               | Yes                      |            |         |                 |         |                | 437, 273                 | 20.7% | (16.6-25.6) | 0.92            | (0.69-1.24) |                                                     |                |
| <b>Used hormonal contraceptive, past year</b>                                 |                          |            |         |                 |         |                |                          |       |             |                 |             |                                                     |                |
|                                                                               |                          |            |         |                 |         |                |                          |       |             |                 |             | 0.1141                                              |                |
|                                                                               | No                       |            |         |                 |         |                | 3759, 3838               | 20.7% | (19.2-22.3) | 1               | -           |                                                     |                |
|                                                                               | Yes                      |            |         |                 |         |                | 2806, 1831               | 20.9% | (19.1-22.7) | 1.14            | (0.97-1.35) |                                                     |                |
| <b>Sexual health indicators</b>                                               |                          |            |         |                 |         |                |                          |       |             |                 |             |                                                     |                |
| <b>Ever diagnosed with a sexually transmitted infection</b>                   |                          |            |         |                 |         |                |                          |       |             |                 |             |                                                     |                |
|                                                                               |                          |            |         |                 |         | <0.0001        |                          |       |             |                 |             | 0.0002                                              | 0.0291         |
|                                                                               | No (or only thrush)      | 4148, 5128 | 7.3%    | (6.5-8.3)       | 1       | -              | 5455, 4861               | 20.0% | (18.7-21.3) | 1               | -           |                                                     |                |
|                                                                               | Yes (excluding thrush)   | 677, 830   | 13.7%   | (11.0-17.0)     | 2.02    | (1.51-2.70)    | 1206, 888                | 25.1% | (22.3-28.1) | 1.39            | (1.16-1.65) |                                                     |                |

Table 2 cont.

|                                                                         |                      | Men                         |       |             |                    |              | Women                       |       |             |                    |             | <i>p</i> -value for interaction with sex <sup>a</sup> |                 |
|-------------------------------------------------------------------------|----------------------|-----------------------------|-------|-------------|--------------------|--------------|-----------------------------|-------|-------------|--------------------|-------------|-------------------------------------------------------|-----------------|
|                                                                         |                      | <i>Denom.</i><br>(unwt, wt) | %     | (95%CI)     | Age-adjusted<br>OR | (95%CI)      | <i>Denom.</i><br>(unwt, wt) | %     | (95%CI)     | Age-adjusted<br>OR | (95%CI)     |                                                       | <i>p</i> -value |
| <b>Ever experienced non-volitional sex</b>                              |                      |                             |       |             |                    |              |                             |       |             |                    |             |                                                       |                 |
|                                                                         | No                   | 4706, 5825                  | 7.9%  | (7.1-8.9)   | 1                  | -            | 5815, 5055                  | 19.4% | (18.2-20.7) | 1                  | -           | <0.0001                                               | 0.1143          |
|                                                                         | Yes/Don't know       | 133, 148                    | 19.4% | (13.1-27.7) | 2.83               | (1.74-4.59)  | 848, 695                    | 30.9% | (27.3-34.6) | 1.86               | (1.55-2.25) |                                                       |                 |
| <b>Sexual competence at first sex<sup>i</sup></b>                       |                      |                             |       |             |                    |              |                             |       |             |                    |             |                                                       |                 |
|                                                                         | Not competent        | 2408, 3039                  | 8.7%  | (7.5-10.0)  | 1                  | -            | 3438, 2927                  | 23.6% | (21.9-25.3) | 1                  | -           | <0.0001                                               | 0.0787          |
|                                                                         | Competent            | 2302, 2784                  | 7.8%  | (6.6-9.2)   | 0.91               | (0.71-1.18)  | 3097, 2716                  | 17.7% | (16.1-19.3) | 0.70               | (0.61-0.81) |                                                       |                 |
| <b>Number of other sexual response problems experienced<sup>j</sup></b> |                      |                             |       |             |                    |              |                             |       |             |                    |             |                                                       |                 |
|                                                                         | 0                    | 3209, 3947                  | 5.3%  | (4.4-6.3)   | 1                  | -            | 4377, 3759                  | 12.9% | (11.7-14.1) | 1                  | -           | <0.0001                                               | 0.0262          |
|                                                                         | 1                    | 1061, 1350                  | 6.1%  | (4.7-7.8)   | 1.14               | (0.81-1.59)  | 1217, 1087                  | 21.7% | (19.0-24.6) | 1.86               | (1.53-2.26) |                                                       |                 |
|                                                                         | 2+                   | 570, 678                    | 29.7% | (25.4-34.4) | 7.57               | (5.68-10.10) | 1075, 909                   | 52.4% | (48.9-56.0) | 7.48               | (6.25-8.94) |                                                       |                 |
| <b>Attitudes</b>                                                        |                      |                             |       |             |                    |              |                             |       |             |                    |             |                                                       |                 |
| <b>People are under pressure to have sex</b>                            |                      |                             |       |             |                    |              |                             |       |             |                    |             |                                                       |                 |
|                                                                         | Else                 | 1799, 2264                  | 7.4%  | (6.0-9.0)   | 1                  | -            | 1851, 1570                  | 16.4% | (14.5-18.5) | 1                  | -           | <0.0001                                               | 0.2192          |
|                                                                         | Strongly agree/agree | 3038, 3707                  | 8.7%  | (7.6-9.9)   | 1.21               | (0.94-1.57)  | 4817, 4185                  | 22.4% | (21.0-23.9) | 1.47               | (1.24-1.74) |                                                       |                 |
| <b>People want less sex as they age</b>                                 |                      |                             |       |             |                    |              |                             |       |             |                    |             |                                                       |                 |
|                                                                         | Else                 | 2943, 3472                  | 6.7%  | (5.7-7.8)   | 1                  | -            | 4044, 3278                  | 17.1% | (15.8-18.6) | 1                  | -           | <0.0001                                               | 0.8045          |
|                                                                         | Strongly agree/agree | 1894, 2499                  | 10.3% | (8.8-12.1)  | 1.58               | (1.22-2.04)  | 2624, 2477                  | 25.6% | (23.7-27.6) | 1.64               | (1.43-1.90) |                                                       |                 |
| <b>Men have a naturally higher sex drive than women</b>                 |                      |                             |       |             |                    |              |                             |       |             |                    |             |                                                       |                 |
|                                                                         | Else                 | 2788, 3441                  | 10.2% | (8.9-11.5)  | 1                  | -            | 3351, 2830                  | 15.9% | (14.4-17.4) | 1                  | -           | <0.0001                                               | <0.0001         |
|                                                                         | Strongly agree/agree | 2049, 2530                  | 5.5%  | (4.4-6.9)   | 0.52               | (0.39-0.68)  | 3317, 2925                  | 25.5% | (23.8-27.4) | 1.81               | (1.56-2.09) |                                                       |                 |
| <b>Too much sex in the media</b>                                        |                      |                             |       |             |                    |              |                             |       |             |                    |             |                                                       |                 |
|                                                                         | Else                 | 1986, 2296                  | 7.5%  | (6.3-9.0)   | 1                  | -            | 2091, 1618                  | 18.8% | (16.8-20.9) | 1                  | -           | 0.0693                                                | 0.8856          |
|                                                                         | Strongly agree/agree | 2851, 3675                  | 8.6%  | (7.5-9.9)   | 1.13               | (0.88-1.46)  | 4577, 4137                  | 21.6% | (20.2-23.0) | 1.16               | (0.99-1.36) |                                                       |                 |

Denominator is those aged 16-74 years with at least one partner in the past year. Unwt, unweighted; wt, weighted

<sup>a</sup> P-value for interaction to determine whether the magnitude of association between each variable and lack of interest in sex differs between men and women

1  
2  
3  
4  
5 <sup>b</sup> IMD is a multidimensional measure of area (neighbourhood)-level deprivation based on the participant's postcode. IMD scores for England, Scotland and Wales were adjusted before being  
6 combined and assigned to quintiles, using a method by Payne and Abel [49].

7 <sup>c</sup> Participants aged  $\geq 17$  years.

8 <sup>d</sup> Includes arthritis, heart attack, coronary heart disease, angina, other forms of heart disease, hypertension, stroke, diabetes, broken hip or pelvis, bone or hip replacement ever, backache  
9 lasting longer than 3 months, any other muscle or bone disease lasting longer than 3 months, depression, cancer and any thyroid condition treated in the past year.

10 <sup>e</sup> Participants were asked whether they had often been bothered by feeling down, depressed, or hopeless in the past 2 weeks, and whether they had often been bothered by little interest or  
11 pleasure in doing things in the past 2 weeks, using a validated two-question patient health questionnaire (PHQ-2).

12 <sup>f</sup> Opposite and/or same-sex partners

13 <sup>g</sup> Other means easy with a husband or wife or regular partner, but difficult with a new partner; easy with a new partner, but difficult with a husband or wife or regular partner; difficult with any  
14 partner, it depends, sometimes easy, and sometimes difficult.

15 <sup>h</sup> Participants were asked to rate how happy they were in their relationship from 1 (very happy) to 7 (very unhappy); responses of 1 or 2 were regarded as denoting participants who were happy  
16 with their relationship.

17 <sup>i</sup> A constructed variable to measure readiness, combining consensuality, autonomy of decision making, timing and use of effective contraception

18 <sup>j</sup> Sexual response problems (for at least 3 months in past year): lacked enjoyment in sex, felt anxious during sex, felt physical pain as a result of sex, felt no excitement or arousal during sex,  
19 difficulty in reaching climax, reached a climax more quickly than you would like, trouble getting or keep an erection (men), uncomfortably dry vagina (women)  
20  
21  
22  
23  
24  
25  
26  
27  
28  
29  
30  
31  
32  
33  
34  
35  
36  
37  
38  
39  
40  
41  
42  
43  
44  
45  
46  
47  
48  
49



# BMJ Open

## What factors are associated with reporting lacking interest in sex and how do these vary by gender?: Findings from the third British National Survey of Sexual Attitudes and Lifestyles

|                                 |                                                                                                                                                                                                                                                                                                                                                                                                                                                                                                                                                                                                                |
|---------------------------------|----------------------------------------------------------------------------------------------------------------------------------------------------------------------------------------------------------------------------------------------------------------------------------------------------------------------------------------------------------------------------------------------------------------------------------------------------------------------------------------------------------------------------------------------------------------------------------------------------------------|
| Journal:                        | <i>BMJ Open</i>                                                                                                                                                                                                                                                                                                                                                                                                                                                                                                                                                                                                |
| Manuscript ID                   | bmjopen-2017-016942.R1                                                                                                                                                                                                                                                                                                                                                                                                                                                                                                                                                                                         |
| Article Type:                   | Research                                                                                                                                                                                                                                                                                                                                                                                                                                                                                                                                                                                                       |
| Date Submitted by the Author:   | 16-Jun-2017                                                                                                                                                                                                                                                                                                                                                                                                                                                                                                                                                                                                    |
| Complete List of Authors:       | Graham, Cynthia; University of Southampton, Psychology<br>Mercer, Catherine; University College London, Research Department of Infection and Population Health<br>Tanton, Clare; University College London, Research Department of Infection & Population Health<br>Jones, Kyle; University College London, Research Department of Infection and Population Health<br>Johnson, Anne; University College London, Research Department of Infection and Population Health<br>Wellings, Kaye; London School of Hygiene and Tropical Medicine,<br>Mitchell, Kirstin; London School of Hygiene and Tropical Medicine |
| <b>Primary Subject Heading</b>: | Sexual health                                                                                                                                                                                                                                                                                                                                                                                                                                                                                                                                                                                                  |
| Secondary Subject Heading:      | Epidemiology                                                                                                                                                                                                                                                                                                                                                                                                                                                                                                                                                                                                   |
| Keywords:                       | SEXUAL MEDICINE, EPIDEMIOLOGY, Sexual and gender disorders < PSYCHIATRY                                                                                                                                                                                                                                                                                                                                                                                                                                                                                                                                        |
|                                 |                                                                                                                                                                                                                                                                                                                                                                                                                                                                                                                                                                                                                |

SCHOLARONE™  
Manuscripts

1  
2  
3 **What factors are associated with reporting lacking interest in sex and how do these**  
4 **vary by gender?: Findings from the third British National Survey of Sexual Attitudes**  
5 **and Lifestyles**  
6

7  
8 Graham, C. A.,<sup>1</sup> Mercer, C. H.,<sup>2</sup> Tanton, C.,<sup>2</sup> Jones, K. G.,<sup>2</sup> Johnson, A. M.,<sup>2</sup> Wellings, K.,<sup>3</sup>  
9 Mitchell, K. R.<sup>4</sup>  
10

11  
12 <sup>1</sup>Centre for Sexual Health Research, Department of Psychology, University of  
13 Southampton, Southampton, U.K.

14 <sup>2</sup>Centre for Sexual Health and HIV Research, Research Department of Infection &  
15 Population Health, University College London, London, U.K.

16 <sup>3</sup>Centre for Sexual and Reproductive Health Research, Department of Social and  
17 Environmental Health Research, London School of Hygiene and Tropical Medicine,  
18 London, U.K.

19 <sup>4</sup>MRC/CSO Social and Public Health Sciences Unit, University of Glasgow, 200 Renfield  
20 Street, Glasgow G2 3QB, U.K.  
21

22  
23  
24 Corresponding author:

25 Cynthia A. Graham

26 Department of Psychology

27 Faculty of Social, Human, and Mathematical Sciences

28 Shackleton Building (B44)

29 University of Southampton

30 Highfield, Southampton

31 SO17 1BJ UK

32 tel: 023 8059 3091

33 e-mail: C.A.Graham@soton.ac.uk  
34  
35  
36  
37

38 Word count: 3,900  
39  
40  
41  
42  
43  
44  
45  
46  
47  
48  
49  
50  
51  
52  
53  
54  
55  
56  
57  
58  
59  
60

## ABSTRACT

**Objectives:** To investigate factors associated with reporting lacking interest in sex, and how these vary by gender.

**Setting:** British general population.

**Design:** Complex survey analyses of data collected for a cross-sectional probability sample survey, undertaken 2010-12, specifically logistic regression to calculate age-adjusted odds ratios (AOR) to identify associated factors.

**Participants:** 4,839 men and 6,669 women aged 16-74 years who reported  $\geq 1$  sexual partner (opposite-sex or same-sex) in the past year for the third National Survey of Sexual Attitudes and Lifestyles [Natsal-3].

**Main outcome measure:** Lacking interest in sex for  $\geq 3$  months in the past year.

**Results:** Overall, 15.0% (13.9-16.2) of men and 34.2% (32.8-35.5) of women reported lacking interest in sex. This was associated with age and physical and mental health for both men and women, including self-reported general health and current depression. Lacking interest in sex was more prevalent among men and women reporting STI diagnoses (ever), non-volitional sex (ever), and holding sexual attitudes related to normative expectations about sex. Some gender similarities in associated relationship and family-related factors were evident, including partner having had sexual difficulties in the last year (M: AOR:1.41 [1.07-1.86]; W: AOR:1.60 [1.32-1.94]), not feeling emotionally close to partner during sex (M: 3.74 [1.76-7.93]; W: 4.80 [2.99-7.69]), and ease of talking about sex (M: 1.53 [1.23-1.90] W: 2.06 [1.77-2.39]). Among women only, lack of interest in sex was higher among those in a relationship of  $>1$  year in duration and those not sharing the same level of interest (4.57 [3.87-5.38]) or preferences (2.91 [2.22-3.83]) with a partner.

**Conclusions:** Both gender similarities and differences were found in factors associated with lacking interest in sex, with the most marked differences in relation to some relationship variables. Findings highlight the need to assess, and if appropriate, treat lacking interest in sex in a holistic and relationship-specific way.

## ARTICLE SUMMARY

**Strengths and limitations of this study**

- This study used nationally representative data to investigate factors associated with reporting lacking interest in sex, and how these vary by gender, in the British population.
- Few previous population-based studies have obtained data on low sexual interest from men and women and made direct comparisons between them.
- The study included detailed assessment of a range of relationship context and attitudinal variables seldom included in previous population-based surveys.
- Information about lacking interest in sex was assessed with a single item, asking participants whether they had lacked interest in having sex for a period of three months or more in the past year. Those who reported this were also asked whether they experienced associated distress.
- The cross-sectional data do not allow us to establish the causal direction of associations between lacking interest in sex and variables of interest.

1  
2  
3 In Britain's third National Survey of Sexual Attitudes and Lifestyles (Natsal-3)  
4  
5 lacking interest in sex was the most common sexual difficulty reported by both men  
6  
7 and women (1). Lacking interest in sex for 3 months or more in the past year was  
8  
9 twice as common in women compared to men. When duration and symptom severity  
10  
11 criteria are considered (i.e., that symptoms last six months or more and occur "very  
12  
13 often" or "always") these prevalence estimates are much lower (2), but the gender  
14  
15 difference is maintained.  
16  
17

18  
19 Researchers have paid more attention to problems of low sexual interest in  
20  
21 women than in men (3-5). Among men the predominant focus has been on erectile  
22  
23 functioning and on physiological causes of lacking interest in sex such as hormonal  
24  
25 status, rather than on psychosocial determinants. This lack of attention to male  
26  
27 problems is reflected in recent revisions to the Diagnostic and Statistical Manual  
28  
29 (DSM-5) classification of sexual disorders (6) which involved major changes to sexual  
30  
31 arousal and desire disorder categories in women, but no substantive changes for male  
32  
33 disorders.  
34  
35  
36  
37

38  
39 Most but not all studies involving men have reported an association between  
40  
41 low sexual interest and increasing age (for review, see 7). However, there are  
42  
43 conflicting findings on the association with physical and mental health (8,9). Limited  
44  
45 research suggests that psychosocial and relationship factors may also be associated  
46  
47 with low sexual desire in men (8, 10-12).  
48  
49

50  
51 Among women, factors that have been consistently associated with lacking  
52  
53 interest in sex are relationship problems, relationship quality, and partner's sexual  
54  
55 functioning (13-17), poor physical health (18), and negative mood states/depression  
56  
57 (13, 18,19). There are inconsistent findings on the association between low sexual  
58  
59  
60

1  
2  
3 interest and both age and menopausal status (14,18). Few large-scale surveys have  
4  
5 examined possible links between lacking interest in sex and either sexual attitudes or  
6  
7 sexual behaviour. In the second wave of the British National Survey of Sexual Attitudes  
8  
9 and Lifestyles (Natsal-2), among women, lacking interest in sex was associated with  
10  
11 lower frequency of sex and attitudes according sex low priority (20).  
12  
13

14  
15 Studies have, for the most part, used small, clinical samples of patients seeking  
16  
17 treatment for low sexual desire problems. The potential for bias in such studies is  
18  
19 revealed in previously reported findings from Natsal-3 that only around a third of men  
20  
21 and women with one or more sexual function problems meeting DSM 5 morbidity  
22  
23 criteria had sought professional help in the last year. (2). The few large-scale  
24  
25 probability-based surveys involving both men and women have focused on  
26  
27 associations between low sexual desire and sociodemographic factors.  
28  
29

30  
31 In summary, the evidence on the factors associated with men's and women's  
32  
33 reports of low sexual desire is drawn largely from non-representative samples, is  
34  
35 somewhat equivocal and, in men, sparse. Given that most previous research has  
36  
37 involved non-representative samples, it is important to explore how correlates might  
38  
39 differ in a population-based sample. Understanding the correlates of lacking interest  
40  
41 in sex is key to informing therapeutic options for this group.  
42  
43

44  
45 The research questions addressed in this paper are: (1) What  
46  
47 sociodemographic, relationship, sexual behaviour, and sexual attitudinal factors are  
48  
49 associated with lacking interest in sex in sexually active men and women?; (2) To what  
50  
51 extent do these factors vary by gender?; (3) To what extent does lacking interest in sex  
52  
53 co-exist with other sexual function problems?  
54  
55

## 56 57 **METHOD** 58 59 60

## Participants and Procedure

Natsal-3 is a probability sample survey of 15,162 men and women aged 16-74 years in Britain, interviewed between September 2010 and August 2012. A multi-stage, clustered, and stratified probability sample design was used and participants were interviewed in their homes by professional interviewers using a combination of computer-assisted personal interviews (CAPI), and computer-assisted self-interviews (CASI) for the more sensitive questions (including, of relevance to this paper, those on sexual function). Interviewers were present in the room while participants completed the CASI, but did not view responses (20). After weighting to adjust for unequal probabilities of selection and to match the British population in terms of age, gender and geographical region, the Natsal-3 sample was broadly representative, on key variables, of the British population as described by the 2011 Census (21).

The estimated response rate was 57.7%, and the estimated cooperation rate (the number of interviews completed from eligible addresses for which contact was made) was 65.8% (of all eligible addressed contacted) (22). More extensive details of the survey methodology and sample characteristics are published elsewhere (21,22) and for demographic characteristics of the sample, see (22). Participants provided oral informed consent for interviews and the survey was approved by the NRES Committee South-Central – Oxford A (Ref.: 10/H0604/27).

For the current analyses, only respondents who reported  $\geq 1$  sexual partner (opposite-sex or same-sex) in the past year were included (4,839 men and 6,669 women).

## Outcome Measures

1  
2  
3 Items were drawn from the Natsal-SF, a measure of sexual function, designed  
4  
5 and validated for population surveys (Comparative Fit Index = 0.963 Tucker Lewis  
6  
7 Index = 0.951; Root Mean Square Error of Approximation = 0.064). The measure  
8  
9 comprised items on problems with sexual response, relational aspects of sexual  
10  
11 function, and self-appraisal of sex life (23,24). Participants who reported at least one  
12  
13 sexual partner in the past year (hereon 'sexually active participants') were asked: '*In*  
14  
15 *the last year, have you experienced any of the following for a period of 3 months or*  
16  
17 *longer?*' and were given a list of difficulties and asked to indicate which they had  
18  
19 experienced. The list included '*Lacked interest in having sex*'. Those indicating this  
20  
21 difficulty were defined as lacking interest in having sex for a period of three months or  
22  
23 more in the past year (the outcome for this analysis). Individuals reporting lacking  
24  
25 interest in sex for at least 3 months were then asked '*And how do you feel about this?*'  
26  
27 with response options: *not at all distressed, a little distressed, fairly distressed; very*  
28  
29 *distressed*. Those answering a little, fairly or very distressed were defined as lacking  
30  
31 interest in sex and having distress about this symptom (outcome for sensitivity  
32  
33 analysis, see below).  
34  
35  
36  
37  
38  
39

#### 40 **Statistical Analysis**

41  
42 All analyses were done using the complex survey functions of STATA (version  
43  
44 14; StataCorp LP, College Station, Texas) to account for the weighting, clustering, and  
45  
46 stratification of the data. We used multivariable logistic regression to calculate age-  
47  
48 adjusted odds ratios (AOR) to examine the associations between reports of lacking  
49  
50 interest in sex lasting three months or longer in the past year, and sociodemographic,  
51  
52 health, relationship, sexual behaviour, and sexual attitude variables. For each variable,  
53  
54 we also tested the interaction with gender, to see if the magnitude of the associations  
55  
56  
57  
58  
59  
60



1  
2  
3 between the above factors and reports of lacking interest in sex was the same for men  
4  
5 and women. We conducted a sensitivity analysis for the outcome variable reporting  
6  
7 lack of interest in sex lasting three months or longer *and* distress about this symptom  
8  
9 to assess whether similar associations were found. We also examined the association  
10  
11 between reporting lacking interest in sex and the other sexual function problems  
12  
13 asked about in Natsal-3, using AORs.  
14  
15

## 16 17 RESULTS

18  
19 Overall, 15.0 (95% CI 13.9-16.2) of sexually active men and 34.2% (95% CI 32.8-  
20  
21 35.5) of sexually active women reported lacking interest in sex for three months or  
22  
23 longer in the year prior to interview. Table 1 presents the associations between  
24  
25 lacking interest in sex and sociodemographic, health, relationship, sexual behaviour,  
26  
27 and sexual attitudinal variables for men and women.  
28  
29

30  
31 Age was significantly associated with lacking interest in sex. Prevalence  
32  
33 increased with age, being lowest among younger participants (16-24 years; M: 11.5%;  
34  
35 W: 24.8%) and peaking in men aged 35-44 years (17.2%) and in women aged 55-64  
36  
37 years (38.8%). Regarding demographic variables, after adjusting for age, lack of  
38  
39 interest was associated with leaving school at 16 (men only; AORS: 1.31), being  
40  
41 unemployed (men only AORS: M: 1.44), and less frequent religious practice (women  
42  
43 only; AOR: 0.79). In women, after adjusting for age, those who were students or  
44  
45 retired were less likely to lack desire.  
46  
47  
48  
49

50  
51 After adjusting for age, there were associations between all physical and  
52  
53 mental health variables assessed and lacking interest in sex. Individuals in poorer  
54  
55 health (AORS: M: 3.29; W: 1.93), those who had much difficulty walking upstairs  
56  
57 (AORS: M: 2.68; W: 1.55), those with a longstanding medical condition (AORS: M 1.76;  
58  
59  
60

1  
2  
3 W: 1.35), and those who had screened positive for current depression (AORs: M: 2.95;  
4  
5 W: 2.79) or who had been treated for depression in the past year (AORs: M: 2.82; W:  
6  
7 2.32) were more likely to report lacking interest in sex. The magnitude of these  
8  
9 associations was similar for men and women. A greater number of comorbid health  
10  
11 conditions was significantly associated with lacking interest in sex among both men  
12  
13 and women. Menopausal status in women and circumcision in men were not  
14  
15 associated with the likelihood of lacking sexual interest.  
16  
17  
18

19  
20       Regarding sexual behaviour, among both men and women, lack of interest was  
21  
22 associated with frequency of sexual activity (defined as vaginal, oral or anal  
23  
24 intercourse) in the four weeks prior to interview; 12.4% of men, and 33.8% of women  
25  
26 who reported having engaged in 3-4 sexual acts reported lack of interest, vs. 20.7% of  
27  
28 men and 42.9% of women who reported no sexual activity. Associations with recent  
29  
30 masturbation differed by gender; lack of interest in sex was slightly *more* common  
31  
32 among men who reported having recently masturbated but *less* common among  
33  
34 women who did so. Women with three or more partners in the past year were less  
35  
36 likely to report low sexual interest than those with only one partner (AOR: 0.70) but  
37  
38 there was no association between partner numbers and lacking interest in sex in men.  
39  
40  
41  
42  
43 Among men only, those who reported ever having taken drugs to assist sexual  
44  
45 performance were more likely to report lacking interest in sex (AOR: 1.36). A similar  
46  
47 magnitude association was seen for women (AOR: 1.39) however, fewer women  
48  
49 reported ever having taken drugs and the 95%CI therefore crosses 1.  
50  
51

52  
53       Associations were found between lacking interest in sex and several  
54  
55 relationship contextual variables and for many of these variables associations were  
56  
57 stronger for women than for men. For both men and women, lack of interest was  
58  
59  
60

1  
2  
3 associated with relationship status; women living with a partner were more likely to  
4  
5 lack interest in sex than those in other relationship categories (see Table 1). For  
6  
7 women, all relationship categories had lower AORs than living with partner. Duration  
8  
9 of most recent sexual relationship was significantly associated with lacking interest in  
10  
11 sex only among women, being more common among those in longer relationships.  
12  
13

14  
15 Among both men and women, there was an association between ease of  
16  
17 communication and lacking interest in sex. Those who found it “always easy to talk  
18  
19 about sex” with their partner were less likely to report low interest. Lack of interest  
20  
21 was more likely among those whose partner had sexual difficulties in the last year, and  
22  
23 those who reported a lower assessment of happiness with the relationship, and not  
24  
25 feeling emotionally close to partner during sex. Among women but not men, not  
26  
27 sharing the same level of sexual interest with a partner, and not sharing the same  
28  
29 sexual likes and dislikes, were also associated.  
30  
31  
32

33  
34 Having been pregnant in the last year was associated with lacking sexual  
35  
36 interest as was having one or more young child(ren) (women only). Lack of interest in  
37  
38 sex was significantly associated with sexual health indicators, including previous STI  
39  
40 diagnosis and ever having experienced non-volitional sex. The strength and direction  
41  
42 of associations was similar for men and women, except for reporting another sexual  
43  
44 function problem, which was significant for two or more problems in men, but one or  
45  
46 more problems in women. Sexual competence at first sex was significantly associated  
47  
48 with lack of interest in sex only among women.  
49  
50  
51

52  
53 Regarding attitudinal variables, both men and women who endorsed  
54  
55 statements that “people are under pressure to have sex” and “people want less sex as  
56  
57 they age” were more likely to report lacking interest in sex over the past year. The  
58  
59  
60

1  
2  
3 only attitudinal variable that showed a significant interaction with gender was that  
4  
5 which related to men having a “naturally higher sex drive than women.” Men who  
6  
7 agreed with this statement were *less* likely than those who disagreed to lack interest  
8  
9 in sex, while the reverse was true among women.  
10  
11

12 Table 2 presents the associations between lacking interest in sex and being  
13  
14 distressed about this (as a measure/marker of severity), and the above  
15  
16 sociodemographic, health, and sexual relationship/behaviour variables. While  
17  
18 prevalence was lower, the associations and the interactions with gender were  
19  
20 generally similar; however, some of the previous gender-specific associations with  
21  
22 variables (e.g., masturbation, and pregnancy in women, and education in men) were  
23  
24 no longer significant when the outcome variable was reported low sexual interest *and*  
25  
26 associated distress. In addition, some associations became stronger when considering  
27  
28 only those who reported a distressing lack of interest in sex (vs. lack of interest  
29  
30 without any reported distress). For example, the association between depressive  
31  
32 symptoms and having been treated for depression in the past year, was stronger in  
33  
34 men than in women.  
35  
36  
37  
38  
39

40 Regarding the association between reporting lacking interest in sex and the  
41  
42 other sexual function problems asked about in Natsal-3, the strongest (positive)  
43  
44 associations were for lacking enjoyment in sex (AORs=9.78 and 8.95 for men and  
45  
46 women, respectively), followed by feeling no excitement or arousal during sex  
47  
48 (AORs=9.21 and 9.16 for men and women, respectively) (see Table 3).  
49  
50  
51

## 52 DISCUSSION

53  
54  
55 We identified a broad range of factors, including some that have not been  
56  
57 explored in previous large-scale surveys, that were associated with men’s and  
58  
59  
60

1  
2  
3 women's reports of lacking interest in sex in a representative British population-based  
4  
5 survey. Our findings, discussed below, revealed some gender similarities as well as  
6  
7 some interesting gender differences. The strongest evidence for gender differences  
8  
9 was for the relationship context variables, where associations with lacking interest in  
10  
11 sex were much stronger for women than for men.  
12  
13

### 14 **Interpretation of findings in context of previous research**

15  
16 Our finding relating to differences by age is consistent with some, but not all,  
17  
18 results from previous research which has yielded generally inconsistent findings. Some  
19  
20 studies have, like ours, shown a higher prevalence of sexual interest problems in older  
21  
22 than in younger women (25-27). Others have found no association between age and  
23  
24 low sexual interest complaints (14, 28) and yet more have shown lack of sexual  
25  
26 interest to be more common among younger women (18). Whereas we found a  
27  
28 marginal relationship with age in men, some studies (though not all e.g., 29) have  
29  
30 found a stronger relationship (12, 30). It is possible that the varied findings might in  
31  
32 part be a result of varied definitions of low sexual interest or differences in sampling.  
33  
34  
35  
36  
37

38  
39 The finding in this analysis that having young children appears to increase the  
40  
41 likelihood of reporting lack of sexual interest for women, but not for men, remains  
42  
43 unchanged since the previous Natsal-2 survey (31). This may be due to fatigue  
44  
45 associated with a primary caring role (32), the fact that daily stress appears to affect  
46  
47 sexual functioning in women more than men (33), or possibly a shift in focus of  
48  
49 attention attendant on bringing up small children.  
50  
51

52  
53 The finding of a link between lacking interest in sex and lacking enjoyment in  
54  
55 sex and/or feeling no excitement or arousal during sex is not surprising and has been  
56  
57 shown in previous studies (3). The strong associations between lack of interest in sex  
58  
59  
60

1  
2  
3 and physical and mental health indicators, which we observed for both men and  
4  
5 women, is not entirely consistent with findings from other studies. While this link has  
6  
7 been persuasively shown for women (13, 18, 19), in men, the evidence is more  
8  
9 equivocal. In a study of men attending an outpatient clinic for sexual problems,  
10  
11 psychological symptoms such as anxiety and depression were more predictive of low  
12  
13 sexual desire than hormonal or other physical markers (11). In contrast, DeRogatis et  
14  
15 al. (9), in their study of men with erectile dysfunction, observed no differences in  
16  
17 depressive symptoms, concurrent illness, or medication use between men with and  
18  
19 without symptoms of low sexual desire.  
20  
21  
22  
23

24       The gender differences in associations between masturbation and a lack of  
25  
26 sexual interest are interesting and have been explored in few previous population-  
27  
28 based studies. Our observation that lack of interest was *more* commonly reported by  
29  
30 men who had recently masturbated, but *less* commonly reported by women who had  
31  
32 done so may reflect a tendency among women for self-pleasuring to be, not a  
33  
34 substitute for partnered sex but instead a part of a broader repertoire of sexual  
35  
36 fulfilment; this possibility is worthy of further exploration. In contrast, for men  
37  
38 frequency of masturbation reflects reduced frequency of partnered sex (34). However,  
39  
40 it is worth noting that in the U.S. National Health and Social Life Survey, lifetime  
41  
42 number of sexual partners and masturbation practices were unrelated to the  
43  
44 likelihood of sexual desire difficulties for either men or women (35).  
45  
46  
47  
48  
49

50       Our observation that duration of most recent sexual relationship showed a  
51  
52 strong association with lacking interest in sex in women is consistent with previous  
53  
54 studies (15, 17). There has been little comparable research on men with which to  
55  
56 corroborate the absence of such an association among men in our analysis.  
57  
58  
59  
60

1  
2  
3 Our data confirm the importance of the relational context in individuals' level  
4 of sexual interest. The strong associations between relationship and partner factors  
5 and sexual interest are consistent with those shown in many previous studies relating  
6 to women (13-17) and with a much smaller literature in men (36,37). In particular,  
7 sexual dysfunction in a male partner has previously been associated with women's  
8 levels of sexual desire (15, 38, 39), and sexual desire discrepancy in couples has been  
9 linked to lower reported relationship satisfaction and more couple conflict (40).

10  
11  
12  
13  
14  
15  
16  
17  
18  
19  
20 The strong links found between several key sexual health outcomes and lack of  
21 interest in sex are interesting; among both men and women, reporting an STI  
22 diagnosis and non-volitional sex were associated with reporting lack of interest in sex.  
23  
24  
25  
26  
27 Our finding that lacking "sexual competence" at first sexual intercourse was linked  
28 with subsequent lack of interest in sex among women but not men, may reflect a  
29 greater salience of contextual aspects of first sex for women. More women than men  
30 report being pressured by a partner on the first occasion of heterosexual intercourse,  
31 and to have subsequently experienced regret about first sexual experiences (41).  
32  
33  
34  
35  
36  
37  
38  
39  
40  
41  
42 These findings suggest that for women, early sexual experiences may shape future  
43 sexual encounters/relationships to a greater extent than for men.

44  
45  
46  
47  
48  
49  
50  
51  
52  
53  
54  
55  
56  
57  
58  
59  
60  
To our knowledge no previous studies have assessed the association between  
attitudes toward sexual matters and lack of interest in sex. Endorsing the assumption  
that "people want less sex as they age" was associated with lack of interest in both  
genders. It might be that this belief contributes to a decline in interest, or – equally  
plausible – that those who lack interest adopt this attitude to avoid viewing their  
experience as problematic. Interestingly, men who endorsed the view that "men have  
a higher sex drive than women" were significantly *less* likely to report lacking interest

1  
2  
3 in sex, whereas women who agreed with this statement were *more* likely to do so. If  
4  
5 people responded to this statement with reference to their own relationship, these  
6  
7 findings may be seen as making intuitive sense. The results suggest that endorsing  
8  
9 stereotypical gender-norms related to sex may adversely affect women more than  
10  
11  
12 men.  
13

### 14 **Strengths and Limitations**

15  
16  
17 Strengths of our study include the use of national probability sample survey  
18  
19 data involving both men and women across a wide age range (21, 22). With a few  
20  
21 exceptions (e.g., 12, 14, 29, 42), most surveys on sexual desire problems have sampled  
22  
23 either men *or* women, precluding direct comparisons within the same sample.  
24  
25

26  
27 Another strength was the detailed and holistic examination of relationship context  
28  
29 and attitudinal variables, which few previous studies have reported. Response rates  
30  
31 for Natsal-3 were also similar to those of other major social surveys in Britain (43) and  
32  
33 higher than many previous surveys of sexual problems (35, 44).  
34  
35

36  
37 Limitations include the cross-sectional nature of the data, which mean that we  
38  
39 are unable to infer temporality and causality. We included only respondents who  
40  
41 reported  $\geq 1$  sexual partner (opposite-sex or same-sex) in the past year, excluding  
42  
43 those who had not had sex because of lack of interest. We only used a single item to  
44  
45 assess lacking interest in sex, although we additionally took account of whether those  
46  
47 who reported this also reported that it caused them distress, as a way of trying to  
48  
49 capture more problematic lack of interest. This sensitivity analysis enabled us to  
50  
51 demonstrate that for most variables, similar associations exist regardless of whether  
52  
53 or not distress was reported. It is important to acknowledge, however, that these data  
54  
55 do not necessarily correspond to clinical diagnoses. Finally, we have tested many  
56  
57  
58  
59  
60



1  
2  
3 associations within this study and some will have been significant by chance. We did  
4  
5 not formally correct our p-values and therefore where  $0.01 < p < 0.05$  we advise caution  
6  
7 in concluding association.  
8  
9

### 10 **Implications for Research and Practice**

11  
12 The findings indicate that lack of interest in sex is associated with a broad  
13  
14 range of factors across sociodemographic, relationship, sexual behaviour, and sexual  
15  
16 attitudinal domains. There are both research and clinical applications of our results.  
17  
18

19  
20 Firstly, our findings underscore the importance of the relational context in  
21  
22 understanding low sexual interest in both men and women. For women in particular,  
23  
24 the experience of sexual interest appears strongly linked with their perceptions of the  
25  
26 quality of their relationships, their communication with partners, and their  
27  
28 expectations/attitudes about sex. Our findings support the view that transient (and  
29  
30 often adaptive) reductions in sexual desire are not evidence of “dysfunction” (45).  
31  
32 In the context of the recent FDA approval of flibanserin, the first drug to treat low  
33  
34 sexual desire in women (46), these findings are relevant to the current debate about  
35  
36 whether striving for a pharmaceutical solution to women’s sexual desire problems is  
37  
38 an appropriate and feasible goal (45, 47). Some authors have suggested that women  
39  
40 with complaints of low sexual interest might benefit most from integrative approaches  
41  
42 that accord with a biopsychosocial model (48).  
43  
44  
45  
46  
47

48  
49 Secondly, our findings on the strong association between open sexual  
50  
51 communication (i.e., “finding it always easy to talk about sex”) and a reduced  
52  
53 likelihood of reporting lack of interest in sex, particularly for women, emphasise the  
54  
55 importance of providing a broad sexual and relationships education, rather than  
56  
57 limiting attention only to adverse consequences of sex and how to prevent them.  
58  
59  
60

1  
2  
3 Similarly, the important role of early sexual experiences, and sexual “competence,”  
4  
5 especially for women, in shaping later experiences of sexual desire supports the need  
6  
7 for comprehensive sex education.  
8  
9

10 In a clinical context, our findings emphasise the importance of health care  
11  
12 professionals assessing psychological and interpersonal variables in individuals  
13  
14 presenting with complaints of low sexual interest (49). In couple therapy, it is  
15  
16 important that therapists have an awareness of the differences between men and  
17  
18 women in the factors associated with low sexual interest. For example, among the  
19  
20 subgroup of participants reporting both lack of interest in sex and related distress, we  
21  
22 found a stronger association between depressive symptoms and treatment for  
23  
24 depression in the last year among men compared with women. Lastly, our findings  
25  
26 support previous research on the critical role of physical and mental health in  
27  
28 understanding low sexual interest problems experienced by men and women (11, 18).  
29  
30  
31  
32

### 33 **Conclusions**

34  
35  
36 This study extends our understanding of the factors associated with lack of  
37  
38 interest in sex in men and women, the gender similarities and differences, and  
39  
40 highlights the need to assess and – if necessary – treat sexual desire problems in a  
41  
42 holistic and relationship- as well as gender-specific way.  
43  
44  
45  
46  
47  
48  
49  
50  
51  
52  
53  
54  
55  
56  
57  
58  
59  
60

### Contribution to authorship

The paper was conceived by CAG, CHM, AMJ, KW, and KRM. CAG wrote the first draft, with further contributions from all authors. Statistical analyses were undertaken by CHM, CT, and KGJ. CHM, AMJ (Principal Investigator) and KW, initial applicants on Natsal-3, wrote the study protocol and obtained funding. Natsal-3 questionnaire design, ethics applications, and piloting were undertaken by CHM, CT, AMJ, KW, and KRM. Data management was undertaken by NatCen Social Research, UCL and LSHTM. All authors contributed to data interpretation, reviewed successive drafts and approved the final version of the manuscript.

### Competing interests statement

AMJ has been a Governor of the Wellcome Trust since 2011. The remaining authors have nothing to disclose. Completed disclosure of interests form available to view online as supporting information.

### Funding Statement

Natsal-3 was supported by grants from the U.K. Medical Research Council (G0701757) and the Wellcome Trust (084840), with support from the Economic and Social Research Council and the Department of Health. Since September 2015, Kirstin Mitchell has been supported by the United Kingdom Medical Research Council grant MC\_UU\_12017/11, and Scottish Government Chief Scientist Office grant SPHSU11.

### Details of ethics approval

Natsal-3 was approved by the NRES Committee South Central-Oxford A (Ref: 10/H0604/27) on 12 July 2010. Participants provided oral informed consent for interviews.

### Data sharing statement

The Natsal-3 dataset is publicly available from the UK Data Service: <https://discover.ukdataservice.ac.uk/>; SN: 7799; persistent identifier: 10.5255/UKDA-SN-77991-1.

## REFERENCES

1. Mitchell KR, Mercer CH, Ploubidis GB, et al. Sexual function in Britain: Findings from the third National Survey of Sexual Attitudes and Lifestyles (Natsal-3). *Lancet* 2013;382:1817-1829.
2. Mitchell KR, Jones KG, Wellings K, et al. Estimating the prevalence of sexual function problems: The impact of morbidity criteria. *J Sex Res* 2016;53:55-967.
3. Brotto LA. The DSM diagnostic criteria for hypoactive sexual desire disorder in women. *Arch Sex Behav* 2010a; 39:221-239.
4. Carvalho J, Nobre P. Biopsychosocial determinants of men's sexual desire: testing an integrative model. *J Sex Med* 2011;8:754-763.
5. Štulhofer A, Carvalheira AA, Træen B. Is responsive sexual desire for partnered sex problematic among men? Insights from a two-country study. *Sex Relation Ther* 2013;28:246-258.
6. American Psychiatric Association. *Diagnostic and statistical manual of mental disorders*, 5th. ed. Arlington, VA: Author 2013.
7. Brotto LA. The DSM diagnostic criteria for hypoactive sexual desire disorder in men. *J Sex Med* 2010b;7:2015-2030.
8. Corona G, Lee DM, Forti G, et al. Age-related changes in general and sexual health in middle-aged and older men: Results from the European Male Ageing Study (EMAS). *J Sex Med* 2010;7:1362-1380.
9. DeRogatis L, Rosen RC, Goldstein I, et al. Characterization of hypoactive sexual desire disorder (HSDD) in men. *J Sex Med* 2012;9:812-820.
10. Carvalheira A, Træen B, Štulhofer A. Correlates of men's sexual interest: a cross-cultural study. *J Sex Med* 2014;11:154-164.

- 1  
2  
3 11. Corona G, Petrone L, Mannucci E, et al. The impotent couple: low desire. *Int J*  
4  
5 *Androl* 2005;28:46-52.  
6
- 7  
8 12. DeLamater JD, Sill M. Sexual desire in later life. *J Sex Res* 2005;42:138-149.  
9
- 10 13. Dennerstein L, Koochaki P, Barton I, et al. Hypoactive sexual desire disorder in  
11  
12 menopausal women: a survey of Western European women. *J Sex Med*  
13  
14 2006;3:212-222.  
15
- 16  
17 14. Hayes RD, Dennerstein L, Bennett CM, et al. Risk factors for female sexual  
18  
19 dysfunction in the general population: Exploring factors associated with low  
20  
21 sexual function and sexual distress. *J Sex Med* 2008;5:1681-1693.  
22  
23
- 24 15. McCabe MP, Goldhammer DL. Demographic and psychological factors related to  
25  
26 sexual desire among heterosexual women in a relationship. *J Sex Res*  
27  
28 2012;49:78-87.  
29
- 30  
31 16. Öberg K, Sjögren Fugl-Meyer K. On Swedish women's distressing sexual  
32  
33 dysfunctions: some concomitant conditions and life satisfaction. *J Sex Med*  
34  
35 2005;2:169-180.  
36
- 37  
38 17. Witting K, Santtila P, Varjonen M, et al. Female sexual dysfunction, sexual distress,  
39  
40 and compatibility with partner. *J Sex Med* 2008;5:2587-2599.  
41
- 42  
43 18. Shifren JL, Monz BU, Russo PA, et al. Sexual problems and distress in United States  
44  
45 women. *Obstet Gynecol* 2008;112:970-978.  
46
- 47  
48 19. Johannes CB, Clayton AH, Odom DM, et al. Distressing sexual problems in United  
49  
50 States women revisited: prevalence after accounting for depression. *J Clin*  
51  
52 *Psychiatry* 2009;70:1698-1706.  
53  
54  
55  
56  
57  
58  
59  
60

- 1  
2  
3 20. Mitchell KR, Mercer CH, Wellings K, Johnson AM. Prevalence of low sexual desire  
4  
5 among women in Britain: Associated factors. *J Sex Med*. 2009; 1;6(9):2434-  
6  
7 2444.  
8  
9  
10 21. Erens B, Phelps A, Clifton S, et al. Methodology of the third British National Survey  
11  
12 of Sexual Attitudes and Lifestyles (Natsal-3). *Sex Transm Infect* 2014;90:84-89.  
13  
14 22. Mercer CH, Tanton C, Prah P, et al. Changes in sexual attitudes and lifestyles in  
15  
16 Britain through the life course and over time: findings from the National  
17  
18 Surveys of Sexual Attitudes and Lifestyles (Natsal). *Lancet* 2013;382:1781-1794.  
19  
20  
21 23. Jones KG, Mitchell KR, Ploubidis GB, et al. The Natsal-SF measure of sexual  
22  
23 function: Comparison of three scoring methods. *J Sex Res* 2015;52:640-646.  
24  
25  
26 24. Mitchell KR, Ploubidis GB, Datta J, et al. The Natsal-SF: a validated measure of  
27  
28 sexual function for use in community surveys. *Eur J Epidemiol* 2012;27:409-18.  
29  
30  
31 25. Abdo CHN, Oliveira WM, Moreira ED, et al. Prevalence of sexual dysfunctions and  
32  
33 correlated conditions in a sample of Brazilian women—results of the Brazilian  
34  
35 study on sexual behavior (BSSB). *Int J Impot Res* 2004;16:160-166.  
36  
37  
38 26. Hayes RD, Dennerstein L, Bennett CM, et al. Relationship between hypoactive  
39  
40 sexual desire disorder and aging. *Fertil Steril* 2007;87:107-112.  
41  
42  
43 27. Peixoto MM, Nobre P. Prevalence and sociodemographic predictors of sexual  
44  
45 problems in Portugal: A population-based study with women aged 18 to 79  
46  
47 years. *J Sex Marital Ther* 2015;41:169-180.  
48  
49  
50 28. Rosen RC, Shifren JL, Monz BU, et al. Correlates of sexually-related personal  
51  
52 distress in women with low sexual desire. *J Sex Med* 2009;6:1549-1560.  
53  
54  
55 29. Laumann EO, Glasser DB, Neves RCS, et al. A population-based survey of sexual  
56  
57 activity, sexual problems and associated help-seeking behavior patterns in  
58  
59  
60

- 1  
2  
3 mature adults in the United States of America. *Int J Impot Res* 2009;21:171-  
4  
5 178.  
6  
7  
8 30. Eplöv L, Giraldi A, Davidsen M, et al. Sexual desire in a nationally representative  
9  
10 Danish population. *J Sex Med* 2007;4:47-56.  
11  
12 31. Mercer CH, Fenton KA, Johnson AM, et al. Who reports sexual function problems?  
13  
14 Empirical evidence from Britain's 2000 National Survey of Sexual Attitudes and  
15  
16 Lifestyles. *Sex Transm Infect* 2005;81:394-399.  
17  
18  
19 32. Park A, Bryson C, Clery E, et al. *British social attitudes 30*. London: NatCen 2013.  
20  
21  
22 33. Bodenmann G, Ledermann T, Blattner D, et al. Associations among everyday  
23  
24 stress, critical life events, and sexual problems. *J of Nerv Ment Dis*  
25  
26 2006;194:494-501.  
27  
28  
29 34. Gerressu M, Mercer CH, Graham CA, et al. Prevalence of masturbation of  
30  
31 associated factors in a British national probability survey. *Arch Sex Behav*  
32  
33 2008;37:266-278.  
34  
35  
36 35. Laumann EO, Paik A, Rosen RC. Sexual dysfunctions in the United States:  
37  
38 Prevalence and predictors. *JAMA* 1999;281:537-544.  
39  
40  
41 36. Janssen E, McBride KR, Yarber W, et al. Factors that influence sexual arousal in  
42  
43 men: A focus group study. *Arch Sex Behav* 2008;37:252-265.  
44  
45  
46 37. Murray S, Milhausen RR, Graham CA, et al. A qualitative exploration of factors that  
47  
48 affect sexual desire among men aged 30 to 65 in long-term relationships. *J Sex*  
49  
50 *Res* 2016;doi 10.1080/00224499.2016.1168352  
51  
52  
53 38. Çayan S, Bozlu M, Canpolat B, et al. The assessment of sexual functions in women  
54  
55 with male partners complaining of erectile dysfunction: does treatment of  
56  
57  
58  
59  
60

- 1  
2  
3 male sexual dysfunction improve female partner's sexual functions? *J Sex*  
4  
5  
6 *Marital Ther* 2004;30:333-341.
- 7  
8 39. Fisher WA, Rosen RC, Eardley I, et al. Experience of female partners of men with  
9  
10 erectile dysfunction: The female experience of men's attitudes to life events  
11  
12 and sexuality (FEMALES) study. *J Sex Med* 2005;2:675-668.
- 13  
14  
15 40. Willoughby BJ, Farero AM, Busby DM. Exploring the effects of sexual desire  
16  
17 discrepancy among married couples. *Arch Sex Behav* 2014;43:551-562.
- 18  
19  
20 41. Hawes ZC, Wellings K, Stephenson J. First heterosexual intercourse in the United  
21  
22 Kingdom: A review of the literature. *J Sex Res* 2010;47:137-152.
- 23  
24  
25 42. Laumann EO, Nicolosi A, Glasser DB, et al. Sexual problems among women and  
26  
27 men aged 40–80 years: Prevalence and correlates identified in the Global Study  
28  
29 of Sexual Attitudes and Behaviors. *Int J Impot Res* 2005;17:39-57.
- 30  
31  
32 43. Park A, Clery E, Curtice J, et al. *British social attitudes: The 28th report*. London,  
33  
34 England: NatCen 2012.
- 35  
36  
37 44. Christensen BS, Grønbaek M, Osler M, et al. Sexual dysfunctions and difficulties in  
38  
39 Denmark: Prevalence and associated sociodemographic factors. *Arch Sex*  
40  
41 *Behav* 2011;40:121-132.
- 42  
43  
44 45. Graham CA, Boynton PM, Gould K. Women's sexual desire: Challenging narratives  
45  
46 of dysfunction. *Eur Psychol*, in press.
- 47  
48  
49 46. Woloshin S, Schwartz LM. US Food and Drug Administration approval of  
50  
51 flibanserin: Even the Score does not add up. *JAMA Intern Med* 2016; doi:  
52  
53 10.1001/jamainternmed.2016.0073
- 54  
55  
56 47. Hart G, Wellings K. Sexual behaviour and its medicalisation: In sickness and in  
57  
58 health. *BMJ* 2002;324:896-900.
- 59  
60



- 1  
2  
3 48. Frühauf S, Gerger H, Schmidt HM, et al. Efficacy of psychological interventions for  
4  
5 sexual dysfunction: a systematic review and meta-analysis. *Arch Sex Behav*  
6  
7 2013;42:915-933.  
8  
9  
10 49. Brotto LA, Atallah CS, Johnson-Agbakwu C, et al. Psychological and interpersonal  
11  
12 dimensions of sexual function and dysfunction. *J Sex Med* 2016;13:538-571.  
13  
14  
15 50. Payne RA, Abel GA. UK indices of multiple deprivation-a way to make comparisons  
16  
17 across constituent countries easier. *Health Stat Q* 2012;53:22-37.  
18  
19  
20  
21  
22  
23  
24  
25  
26  
27  
28  
29  
30  
31  
32  
33  
34  
35  
36  
37  
38  
39  
40  
41  
42  
43  
44  
45  
46  
47  
48  
49  
50  
51  
52  
53  
54  
55  
56  
57  
58  
59  
60

Table 1: Factors associated with lacking interest in having sex for at least 3 months in the past year in sexually active men and women

|                                                              | Men                                  |              |                    |                    |             |                 | Women                                |              |                    |                    |             |                 | <i>p</i> -value for interaction with sex <sup>a</sup> |
|--------------------------------------------------------------|--------------------------------------|--------------|--------------------|--------------------|-------------|-----------------|--------------------------------------|--------------|--------------------|--------------------|-------------|-----------------|-------------------------------------------------------|
|                                                              | <i>Denom.</i><br>( <i>unwt, wt</i> ) | %            | (95%CI)            | Age-adjusted<br>OR | (95%CI)     | <i>p</i> -value | <i>Denom.</i><br>( <i>unwt, wt</i> ) | %            | (95%CI)            | Age-adjusted<br>OR | (95%CI)     | <i>p</i> -value |                                                       |
| <b>All</b>                                                   | <b>4839, 5973</b>                    | <b>15.0%</b> | <b>(13.9-16.2)</b> |                    |             |                 | <b>6669, 5755</b>                    | <b>34.2%</b> | <b>(32.8-35.5)</b> |                    |             |                 |                                                       |
| <b>Socio-demographics</b>                                    |                                      |              |                    |                    |             |                 |                                      |              |                    |                    |             |                 |                                                       |
| <b>Age group</b>                                             |                                      |              |                    |                    |             | 0.0471          |                                      |              |                    |                    |             | <0.0001         | 0.6733                                                |
| 16-24                                                        | 1279, 936                            | 11.5%        | (9.4-14.0)         | 1                  | -           |                 | 1662, 923                            | 24.8%        | (22.5-27.1)        | 1                  | -           |                 |                                                       |
| 25-34                                                        | 1376, 1238                           | 14.6%        | (12.7-16.6)        | 1.32               | (1.00-1.73) |                 | 2236, 1246                           | 31.9%        | (29.8-34.1)        | 1.42               | (1.22-1.66) |                 |                                                       |
| 35-44                                                        | 719, 1298                            | 17.2%        | (14.5-20.4)        | 1.61               | (1.19-2.18) |                 | 1050, 1290                           | 36.8%        | (33.7-40.1)        | 1.77               | (1.48-2.13) |                 |                                                       |
| 45-54                                                        | 630, 1186                            | 15.3%        | (12.5-18.7)        | 1.40               | (1.01-1.95) |                 | 871, 1186                            | 37.9%        | (34.5-41.5)        | 1.86               | (1.53-2.25) |                 |                                                       |
| 55-64                                                        | 512, 849                             | 16.5%        | (13.4-20.2)        | 1.53               | (1.10-2.13) |                 | 569, 755                             | 38.8%        | (34.5-43.2)        | 1.92               | (1.55-2.39) |                 |                                                       |
| 65-74                                                        | 323, 467                             | 13.9%        | (10.4-18.3)        | 1.22               | (0.81-1.82) |                 | 281, 355                             | 34.2%        | (28.4-40.5)        | 1.58               | (1.18-2.12) |                 |                                                       |
| <b>Index of Multiple Deprivation (quintiles)<sup>b</sup></b> |                                      |              |                    |                    |             | 0.093           |                                      |              |                    |                    |             | 0.0316          | 0.0111                                                |
| 1 (least deprived)                                           | 977, 1279                            | 13.9%        | (11.6-16.6)        | 1                  | -           |                 | 1248, 1208                           | 35.7%        | (32.6-38.9)        | 1                  | -           |                 |                                                       |
| 2                                                            | 962, 1264                            | 13.0%        | (10.8-15.6)        | 0.93               | (0.69-1.25) |                 | 1290, 1208                           | 33.6%        | (30.6-36.7)        | 0.92               | (0.76-1.13) |                 |                                                       |
| 3                                                            | 942, 1169                            | 18.0%        | (15.2-21.2)        | 1.38               | (1.04-1.85) |                 | 1299, 1116                           | 30.1%        | (27.2-33.2)        | 0.81               | (0.66-0.99) |                 |                                                       |
| 4                                                            | 967, 1184                            | 15.3%        | (12.8-18.3)        | 1.15               | (0.86-1.55) |                 | 1384, 1137                           | 35.9%        | (33.0-39.0)        | 1.08               | (0.89-1.30) |                 |                                                       |
| 5 (most deprived)                                            | 991, 1077                            | 15.1%        | (12.7-17.8)        | 1.14               | (0.85-1.52) |                 | 1448, 1086                           | 35.3%        | (32.4-38.3)        | 1.06               | (0.87-1.28) |                 |                                                       |
| <b>Education level<sup>c</sup></b>                           |                                      |              |                    |                    |             | 0.0083          |                                      |              |                    |                    |             | 0.2453          | 0.2914                                                |
| Left school aged 17+                                         | 2862, 3464                           | 13.5%        | (12.1-15.1)        | 1                  | -           |                 | 4150, 3406                           | 32.7%        | (31.0-34.5)        | 1                  | -           |                 |                                                       |
| Left school at 16                                            | 1873, 2437                           | 17.2%        | (15.3-19.4)        | 1.31               | (1.07-1.60) |                 | 2409, 2287                           | 36.6%        | (34.4-38.9)        | 1.08               | (0.95-1.23) |                 |                                                       |
| <b>Employment status</b>                                     |                                      |              |                    |                    |             | 0.0086          |                                      |              |                    |                    |             | 0.0003          | 0.0766                                                |
| Employed                                                     | 3211, 4254                           | 14.7%        | (13.3-16.1)        | 1                  | -           |                 | 3871, 3517                           | 34.6%        | (32.9-36.4)        | 1                  | -           |                 |                                                       |
| Full-time education                                          | 542, 431                             | 12.6%        | (8.8-17.5)         | 0.98               | (0.64-1.51) |                 | 693, 423                             | 22.5%        | (19.0-26.4)        | 0.70               | (0.55-0.89) |                 |                                                       |
| Unemployed                                                   | 707, 723                             | 19.6%        | (16.3-23.4)        | 1.44               | (1.12-1.86) |                 | 1681, 1282                           | 36.1%        | (33.4-39.0)        | 1.11               | (0.96-1.28) |                 |                                                       |
| Retired                                                      | 375, 562                             | 13.6%        | (10.4-17.7)        | 0.75               | (0.52-1.09) |                 | 415, 524                             | 35.8%        | (31.0-40.9)        | 0.75               | (0.57-0.99) |                 |                                                       |
| <b>Practises religion at least once a month</b>              |                                      |              |                    |                    |             | 0.1687          |                                      |              |                    |                    |             | 0.0082          | 0.9966                                                |
| No                                                           | 4283, 5179                           | 15.3%        | (14.1-16.6)        | 1                  | -           |                 | 5659, 4754                           | 34.8%        | (33.3-36.3)        | 1                  | -           |                 |                                                       |
| Yes                                                          | 521, 748                             | 12.9%        | (10.0-16.4)        | 0.81               | (0.60-1.09) |                 | 956, 945                             | 30.7%        | (27.5-34.2)        | 0.79               | (0.67-0.94) |                 |                                                       |

Table 1 cont.

|                                                                 | Men                                |       |             |                        |             |         | Women                              |       |             |                        |             |         |                                                             |
|-----------------------------------------------------------------|------------------------------------|-------|-------------|------------------------|-------------|---------|------------------------------------|-------|-------------|------------------------|-------------|---------|-------------------------------------------------------------|
|                                                                 | <i>Denom.</i><br><i>(unwt, wt)</i> | %     | (95%CI)     | Age-<br>adjusted<br>OR | (95%CI)     | p-value | <i>Denom.</i><br><i>(unwt, wt)</i> | %     | (95%CI)     | Age-<br>adjusted<br>OR | (95%CI)     | p-value | <i>p-value for<br/>interaction<br/>with sex<sup>a</sup></i> |
| <b>Health</b>                                                   |                                    |       |             |                        |             |         |                                    |       |             |                        |             |         |                                                             |
| <b>Self-reported general health</b>                             |                                    |       |             |                        |             |         |                                    |       |             |                        |             |         |                                                             |
|                                                                 |                                    |       |             |                        |             | <0.0001 |                                    |       |             |                        |             | <0.0001 | 0.1890                                                      |
| Very good/Good                                                  | 4123, 5055                         | 13.4% | (12.2-14.6) | 1                      | -           |         | 5683, 4851                         | 32.3% | (30.9-33.8) | 1                      | -           |         |                                                             |
| Fair                                                            | 580, 745                           | 21.9% | (18.3-25.8) | 1.8                    | (1.41-2.30) |         | 780, 709                           | 42.2% | (38.2-46.3) | 1.45                   | (1.21-1.75) |         |                                                             |
| Bad/very bad                                                    | 135, 171                           | 33.9% | (25.3-43.6) | 3.29                   | (2.14-5.06) |         | 206, 195                           | 49.9% | (42.2-57.7) | 1.93                   | (1.40-2.67) |         |                                                             |
| <b>Difficulty walking up stairs because of a health problem</b> |                                    |       |             |                        |             |         |                                    |       |             |                        |             |         |                                                             |
|                                                                 |                                    |       |             |                        |             | <0.0001 |                                    |       |             |                        |             | 0.0497  | 0.1179                                                      |
| No difficulty                                                   | 4475, 5460                         | 14.1% | (12.9-15.3) | 1                      | -           |         | 6062, 5107                         | 33.3% | (31.8-34.7) | 1                      | -           |         |                                                             |
| Some difficulty                                                 | 278, 393                           | 23.0% | (18.1-28.8) | 1.8                    | (1.30-2.49) |         | 450, 482                           | 39.2% | (34.4-44.2) | 1.15                   | (0.92-1.43) |         |                                                             |
| Much difficulty/unable to do this                               | 86, 120                            | 30.9% | (20.9-43.0) | 2.68                   | (1.57-4.57) |         | 157, 166                           | 47.0% | (38.0-56.1) | 1.55                   | (1.06-2.25) |         |                                                             |
| <b>Longstanding illness or disability</b>                       |                                    |       |             |                        |             |         |                                    |       |             |                        |             |         |                                                             |
|                                                                 |                                    |       |             |                        |             | <0.0001 |                                    |       |             |                        |             | <0.0001 | 0.1348                                                      |
| No                                                              | 3585, 4259                         | 12.8% | (11.6-14.2) | 1                      | -           |         | 4843, 4026                         | 31.6% | (30.0-33.2) | 1                      | -           |         |                                                             |
| Yes                                                             | 1253, 1713                         | 20.5% | (18.1-23.1) | 1.76                   | (1.44-2.16) |         | 1825, 1729                         | 40.1% | (37.5-42.8) | 1.35                   | (1.17-1.55) |         |                                                             |
| <b>Number of comorbid conditions<sup>d</sup></b>                |                                    |       |             |                        |             |         |                                    |       |             |                        |             |         |                                                             |
|                                                                 |                                    |       |             |                        |             | <0.0001 |                                    |       |             |                        |             | <0.0001 | 0.7951                                                      |
| 0                                                               | 3453, 3994                         | 12.8% | (11.5-14.1) | 1                      | -           |         | 4357, 3536                         | 29.9% | (28.2-31.5) | 1                      | -           |         |                                                             |
| 1                                                               | 939, 1329                          | 18.9% | (16.2-21.9) | 1.64                   | (1.30-2.06) |         | 1555, 1416                         | 38.6% | (35.9-41.5) | 1.42                   | (1.23-1.64) |         |                                                             |
| >=2                                                             | 446, 650                           | 21.0% | (17.0-25.6) | 1.91                   | (1.41-2.60) |         | 755, 802                           | 45.1% | (41.2-49.1) | 1.75                   | (1.45-2.13) |         |                                                             |
| <b>Depressive symptoms<sup>e</sup></b>                          |                                    |       |             |                        |             |         |                                    |       |             |                        |             |         |                                                             |
|                                                                 |                                    |       |             |                        |             | <0.0001 |                                    |       |             |                        |             | <0.0001 | 0.6249                                                      |
| No                                                              | 4383, 5471                         | 13.5% | (12.4-14.8) | 1                      | -           |         | 5885, 5149                         | 31.7% | (30.2-33.1) | 1                      | -           |         |                                                             |
| Yes                                                             | 449, 495                           | 31.3% | (26.4-36.7) | 2.95                   | (2.26-3.85) |         | 780, 602                           | 55.2% | (51.0-59.5) | 2.79                   | (2.32-3.37) |         |                                                             |
| <b>Treated for depression, past year</b>                        |                                    |       |             |                        |             |         |                                    |       |             |                        |             |         |                                                             |
|                                                                 |                                    |       |             |                        |             | <0.0001 |                                    |       |             |                        |             | <0.0001 | 0.2447                                                      |
| No                                                              | 4524, 5630                         | 14.0% | (12.9-15.2) | 1                      | -           |         | 5770, 5040                         | 31.7% | (30.2-33.2) | 1                      | -           |         |                                                             |
| Yes                                                             | 313, 342                           | 31.5% | (25.7-38.0) | 2.82                   | (2.08-3.83) |         | 897, 713                           | 51.4% | (47.6-55.2) | 2.32                   | (1.96-2.75) |         |                                                             |

Table 1 cont.

|                                                      |                | Men                         |       |             |                    |             | Women                       |       |             |                    |             | <i>p</i> -value for interaction with sex <sup>a</sup> |                 |
|------------------------------------------------------|----------------|-----------------------------|-------|-------------|--------------------|-------------|-----------------------------|-------|-------------|--------------------|-------------|-------------------------------------------------------|-----------------|
|                                                      |                | <i>Denom.</i><br>(unwt, wt) | %     | (95%CI)     | Age-adjusted<br>OR | (95%CI)     | <i>Denom.</i><br>(unwt, wt) | %     | (95%CI)     | Age-adjusted<br>OR | (95%CI)     |                                                       | <i>p</i> -value |
| <b>Menopausal status</b>                             |                |                             |       |             |                    |             |                             |       |             |                    |             |                                                       |                 |
|                                                      | Not menopausal |                             |       |             |                    |             | 5485, 4187                  | 32.3% | (30.9-33.8) | 1                  | -           | 0.9326                                                |                 |
|                                                      | Menopausal     |                             |       |             |                    |             | 1167, 1548                  | 38.9% | (36.0-41.9) | 0.99               | (0.79-1.24) |                                                       |                 |
| <b>Circumcised</b>                                   |                |                             |       |             |                    |             |                             |       |             |                    |             |                                                       |                 |
|                                                      | No             | 3909, 4728                  | 15.1% | (13.8-16.4) | 1                  | -           |                             |       |             |                    |             |                                                       |                 |
|                                                      | Yes            | 857, 1166                   | 14.5% | (12.0-17.4) | 0.94               | (0.73-1.20) |                             |       |             |                    |             | 0.5951                                                |                 |
| <b>Sexual behaviour</b>                              |                |                             |       |             |                    |             |                             |       |             |                    |             |                                                       |                 |
| <b>Number of occasions of sex, past 4 weeks</b>      |                |                             |       |             |                    |             |                             |       |             |                    |             |                                                       |                 |
|                                                      | 0              | 1013, 1163                  | 20.7% | (17.8-23.8) | 1                  | -           | 1408, 1245                  | 42.9% | (39.9-45.9) | 1                  | -           | <0.0001                                               | 0.4778          |
|                                                      | 1-2            | 1160, 1566                  | 18.7% | (16.2-21.5) | 0.89               | (0.69-1.14) | 1481, 1373                  | 39.6% | (36.7-42.5) | 0.89               | (0.75-1.05) |                                                       |                 |
|                                                      | 3-4            | 870, 1168                   | 12.4% | (10.1-15.1) | 0.54               | (0.41-0.73) | 1240, 1130                  | 33.8% | (30.7-37.0) | 0.7                | (0.58-0.85) |                                                       |                 |
|                                                      | 5+             | 1617, 1869                  | 9.2%  | (7.8-11.0)  | 0.39               | (0.30-0.51) | 2078, 1655                  | 22.6% | (20.5-24.8) | 0.41               | (0.34-0.49) |                                                       |                 |
| <b>Masturbation, past 4 weeks</b>                    |                |                             |       |             |                    |             |                             |       |             |                    |             |                                                       |                 |
|                                                      | No             | 1297, 1828                  | 13.7% | (11.8-15.8) | 1                  | -           | 4032, 3612                  | 36.0% | (34.3-37.7) | 1                  | -           | 0.0038                                                | 0.0005          |
|                                                      | Yes            | 3531, 4132                  | 15.6% | (14.2-17.0) | 1.24               | (1.00-1.52) | 2615, 2114                  | 30.8% | (28.7-33.0) | 0.83               | (0.73-0.94) |                                                       |                 |
| <b>No. of sexual partners, past year<sup>f</sup></b> |                |                             |       |             |                    |             |                             |       |             |                    |             |                                                       |                 |
|                                                      | 1              | 3573, 4824                  | 15.0% | (13.7-16.3) | 1                  | -           | 5440, 5012                  | 35.3% | (33.8-36.8) | 1                  | -           | 0.0038                                                | 0.0183          |
|                                                      | 2              | 539, 513                    | 16.2% | (12.9-20.3) | 1.14               | (0.86-1.52) | 570, 364                    | 28.2% | (23.9-32.8) | 0.80               | (0.63-1.01) |                                                       |                 |
|                                                      | 3+             | 718, 627                    | 13.6% | (11.1-16.6) | 0.94               | (0.72-1.22) | 642, 366                    | 24.8% | (21.0-29.0) | 0.70               | (0.56-0.88) |                                                       |                 |
| <b>Paid for sex, past year</b>                       |                |                             |       |             |                    |             |                             |       |             |                    |             |                                                       |                 |
|                                                      | No             | 4774, 5896                  | 15.0% | (13.9-16.2) | 1                  | -           |                             |       |             |                    |             | 0.7167                                                |                 |
|                                                      | Yes            | 64, 75                      | 13.4% | (6.8-24.7)  | 0.87               | (0.41-1.84) |                             |       |             |                    |             |                                                       |                 |
| <b>Ever taken drugs to assist sexual performance</b> |                |                             |       |             |                    |             |                             |       |             |                    |             |                                                       |                 |
|                                                      | No             | 4188, 5180                  | 14.4% | (13.2-15.7) | 1                  | -           | 6478, 5624                  | 34.0% | (32.6-35.4) | 1                  | -           | 0.0666                                                | 0.8967          |
|                                                      | Yes            | 636, 776                    | 19.0% | (15.7-22.8) | 1.36               | (1.06-1.76) | 184, 124                    | 40.0% | (32.0-48.5) | 1.39               | (0.98-1.96) |                                                       |                 |

Table 1 cont.

|                                                                            | Men                                |       |             |                    |             |         | Women                              |       |             |                    |             |         |                                                     |
|----------------------------------------------------------------------------|------------------------------------|-------|-------------|--------------------|-------------|---------|------------------------------------|-------|-------------|--------------------|-------------|---------|-----------------------------------------------------|
|                                                                            | <i>Denom.</i><br><i>(unwt, wt)</i> | %     | (95%CI)     | Age-adjusted<br>OR | (95%CI)     | p-value | <i>Denom.</i><br><i>(unwt, wt)</i> | %     | (95%CI)     | Age-adjusted<br>OR | (95%CI)     | p-value | <i>p-value for interaction with sex<sup>a</sup></i> |
| <b>Relationship context</b>                                                |                                    |       |             |                    |             |         |                                    |       |             |                    |             |         |                                                     |
| <b>Relationship status</b>                                                 |                                    |       |             |                    |             | 0.0383  |                                    |       |             |                    |             | <0.0001 | 0.0001                                              |
| Living with partner                                                        | 2708, 4266                         | 15.5% | (14.1-17.1) | 1                  | -           |         | 3967, 4168                         | 37.9% | (36.3-39.7) | 1                  | -           |         |                                                     |
| In a steady relationship, not living together                              | 947, 760                           | 12.0% | (9.6-14.8)  | 0.76               | (0.57-1.00) |         | 1360, 790                          | 22.6% | (20.2-25.2) | 0.51               | (0.43-0.60) |         |                                                     |
| Not in a steady relationship, but previously cohabited                     | 446, 388                           | 18.2% | (14.6-22.5) | 1.22               | (0.91-1.62) |         | 752, 462                           | 28.9% | (25.4-32.8) | 0.68               | (0.56-0.83) |         |                                                     |
| Not in a steady relationship, never cohabited                              | 727, 551                           | 12.4% | (9.9-15.5)  | 0.8                | (0.58-1.09) |         | 580, 330                           | 21.3% | (17.6-25.5) | 0.49               | (0.38-0.63) |         |                                                     |
| <b>Duration of most recent sexual relationship</b>                         |                                    |       |             |                    |             | 0.494   |                                    |       |             |                    |             | <0.0001 | <0.0001                                             |
| 1 year or less                                                             | 1462, 1260                         | 13.0% | (11.0-15.3) | 1                  | -           |         | 1597, 998                          | 21.5% | (19.1-24.1) | 1                  | -           |         |                                                     |
| Between 1 and 5 years                                                      | 1247, 1227                         | 15.3% | (13.2-17.7) | 1.21               | (0.94-1.55) |         | 1758, 1148                         | 28.5% | (26.1-31.0) | 1.45               | (1.20-1.76) |         |                                                     |
| Between 5 and 15 years                                                     | 1065, 1484                         | 14.9% | (12.6-17.5) | 1.14               | (0.86-1.50) |         | 1774, 1458                         | 39.8% | (37.2-42.4) | 2.37               | (1.96-2.86) |         |                                                     |
| Over 15 years                                                              | 1004, 1904                         | 16.1% | (13.9-18.7) | 1.19               | (0.87-1.63) |         | 1445, 2036                         | 40.0% | (37.3-42.7) | 2.31               | (1.84-2.91) |         |                                                     |
| <b>Always easy to talk about sex with partners<sup>e</sup></b>             |                                    |       |             |                    |             | 0.0001  |                                    |       |             |                    |             | <0.0001 | 0.0182                                              |
| Yes                                                                        | 1695, 1899                         | 11.5% | (9.7-13.5)  | 1                  | -           |         | 1746, 1451                         | 22.6% | (20.4-25.1) | 1                  | -           |         |                                                     |
| No/other                                                                   | 3122, 4048                         | 16.7% | (15.3-18.2) | 1.53               | (1.23-1.90) |         | 4907, 4289                         | 38.0% | (36.4-39.6) | 2.06               | (1.77-2.39) |         |                                                     |
| <b>Happy with relationship<sup>h</sup></b>                                 |                                    |       |             |                    |             | <0.0001 |                                    |       |             |                    |             | <0.0001 | 0.8679                                              |
| Yes                                                                        | 1951, 2791                         | 12.6% | (11.0-14.4) | 1                  | -           |         | 2736, 2601                         | 31.5% | (29.5-33.6) | 1                  | -           |         |                                                     |
| Other                                                                      | 995, 1430                          | 21.0% | (18.4-23.9) | 1.85               | (1.47-2.32) |         | 1640, 1617                         | 45.4% | (42.7-48.1) | 1.79               | (1.55-2.08) |         |                                                     |
| <b>Participant does not share same level of interest in sex as partner</b> |                                    |       |             |                    |             | 0.2339  |                                    |       |             |                    |             | <0.0001 | <0.0001                                             |
| No/other                                                                   | 2270, 3233                         | 15.0% | (13.4-16.7) | 1                  | -           |         | 3211, 3064                         | 27.2% | (25.4-29.0) | 1                  | -           |         |                                                     |
| Yes                                                                        | 676, 988                           | 17.1% | (14.2-20.4) | 1.17               | (0.90-1.51) |         | 1166, 1155                         | 62.5% | (59.2-65.7) | 4.57               | (3.87-5.38) |         |                                                     |

Table 1 cont.

|                                                                               | Men                                  |       |             |                    |             |                 | Women                                |       |             |                    |             |                 | <i>p</i> -value for interaction with sex <sup>a</sup> |
|-------------------------------------------------------------------------------|--------------------------------------|-------|-------------|--------------------|-------------|-----------------|--------------------------------------|-------|-------------|--------------------|-------------|-----------------|-------------------------------------------------------|
|                                                                               | <i>Denom.</i><br>( <i>unwt, wt</i> ) | %     | (95%CI)     | Age-adjusted<br>OR | (95%CI)     | <i>p</i> -value | <i>Denom.</i><br>( <i>unwt, wt</i> ) | %     | (95%CI)     | Age-adjusted<br>OR | (95%CI)     | <i>p</i> -value |                                                       |
| <b>Participant does not share same sexual likes &amp; dislikes as partner</b> |                                      |       |             |                    |             | 0.4188          |                                      |       |             |                    |             | <0.0001         | <0.0001                                               |
| No/other                                                                      | 2650, 3803                           | 15.3% | (13.8-16.9) | 1                  | -           |                 | 4079, 3908                           | 34.9% | (33.3-36.6) | 1                  | -           |                 |                                                       |
| Yes                                                                           | 296, 418                             | 17.3% | (13.0-22.5) | 1.16               | (0.81-1.66) |                 | 297, 310                             | 61.0% | (54.6-67.2) | 2.91               | (2.22-3.83) |                 |                                                       |
| <b>Partner experienced sexual difficulties in past year</b>                   |                                      |       |             |                    |             | 0.0136          |                                      |       |             |                    |             | <0.0001         | 0.4140                                                |
| No/other                                                                      | 2431, 3454                           | 14.6% | (13.1-16.2) | 1                  | -           |                 | 3726, 3498                           | 34.8% | (33.1-36.6) | 1                  | -           |                 |                                                       |
| Yes                                                                           | 513, 763                             | 19.4% | (15.8-23.6) | 1.41               | (1.07-1.86) |                 | 649, 719                             | 46.8% | (42.5-51.1) | 1.60               | (1.32-1.94) |                 |                                                       |
| <b>Does not feel emotionally close to partner when have sex</b>               |                                      |       |             |                    |             | 0.0006          |                                      |       |             |                    |             | <0.0001         | 0.5972                                                |
| No/other                                                                      | 2904, 4165                           | 15.1% | (13.7-16.6) | 1                  | -           |                 | 4263, 4108                           | 35.9% | (34.3-37.6) | 1                  | -           |                 |                                                       |
| Yes                                                                           | 42, 56                               | 39.9% | (23.6-58.8) | 3.74               | (1.76-7.93) |                 | 112, 109                             | 73.0% | (62.8-81.3) | 4.80               | (2.99-7.69) |                 |                                                       |
| <b>Lifestyle</b>                                                              |                                      |       |             |                    |             |                 |                                      |       |             |                    |             |                 |                                                       |
| <b>1+ child(ren) aged &lt;5 in household</b>                                  |                                      |       |             |                    |             | 0.9088          |                                      |       |             |                    |             | <0.0001         | 0.0216                                                |
| No, none                                                                      | 4100, 5015                           | 15.2% | (13.9-16.5) | 1                  | -           |                 | 4997, 4671                           | 33.1% | (31.6-34.6) | 1                  | -           |                 |                                                       |
| Yes, 1+                                                                       | 727, 941                             | 14.5% | (11.9-17.6) | 0.98               | (0.76-1.28) |                 | 1664, 1074                           | 38.6% | (36.0-41.4) | 1.55               | (1.34-1.79) |                 |                                                       |
| <b>Pregnant in the last year</b>                                              |                                      |       |             |                    |             |                 |                                      |       |             |                    |             | 0.0114          |                                                       |
| No                                                                            |                                      |       |             |                    |             |                 | 4227, 4122                           | 36.2% | (34.6-37.9) | 1                  | -           |                 |                                                       |
| Yes                                                                           |                                      |       |             |                    |             |                 | 437, 273                             | 41.7% | (36.6-47.1) | 1.36               | (1.07-1.72) |                 |                                                       |
| <b>Used hormonal contraceptive, past year</b>                                 |                                      |       |             |                    |             |                 |                                      |       |             |                    |             | 0.05            |                                                       |
| No                                                                            |                                      |       |             |                    |             |                 | 3759, 3838                           | 34.8% | (33.1-36.5) | 1                  | -           |                 |                                                       |
| Yes                                                                           |                                      |       |             |                    |             |                 | 2806, 1831                           | 33.0% | (30.9-35.1) | 1.15               | (1.00-1.33) |                 |                                                       |
| <b>Sexual health indicators</b>                                               |                                      |       |             |                    |             |                 |                                      |       |             |                    |             |                 |                                                       |
| <b>Ever diagnosed with a sexually transmitted infection</b>                   |                                      |       |             |                    |             | <0.0001         |                                      |       |             |                    |             | 0.0004          | 0.0651                                                |
| No (or only thrush)                                                           | 4147, 5127                           | 14.0% | (12.8-15.3) | 1                  | -           |                 | 5455, 4861                           | 33.4% | (31.9-34.9) | 1                  | -           |                 |                                                       |
| Yes (excluding thrush)                                                        | 677, 830                             | 21.4% | (18.1-25.0) | 1.67               | (1.33-2.10) |                 | 1206, 888                            | 38.2% | (35.1-41.5) | 1.32               | (1.13-1.54) |                 |                                                       |

Table 1 cont.

|                                                                         | Men                                  |       |             |                    |             |                 | Women                                |       |             |                    |             |                 | <i>p</i> -value for interaction with sex <sup>a</sup> |
|-------------------------------------------------------------------------|--------------------------------------|-------|-------------|--------------------|-------------|-----------------|--------------------------------------|-------|-------------|--------------------|-------------|-----------------|-------------------------------------------------------|
|                                                                         | <i>Denom.</i><br>( <i>unwt, wt</i> ) | %     | (95%CI)     | Age-adjusted<br>OR | (95%CI)     | <i>p</i> -value | <i>Denom.</i><br>( <i>unwt, wt</i> ) | %     | (95%CI)     | Age-adjusted<br>OR | (95%CI)     | <i>p</i> -value |                                                       |
| <b>Ever experienced non-volitional sex</b>                              |                                      |       |             |                    |             | 0.0010          |                                      |       |             |                    |             | <0.0001         | 0.3164                                                |
| No                                                                      | 4705, 5824                           | 14.7% | (13.6-16.0) | 1                  | -           |                 | 5815, 5055                           | 32.8% | (31.4-34.2) | 1                  | -           |                 |                                                       |
| Yes/Don't know                                                          | 133, 148                             | 26.1% | (18.9-34.9) | 2.07               | (1.34-3.18) |                 | 848, 695                             | 44.3% | (40.5-48.3) | 1.66               | (1.40-1.97) |                 |                                                       |
| <b>Sexual competence at first sex<sup>i</sup></b>                       |                                      |       |             |                    |             | 0.0706          |                                      |       |             |                    |             | <0.0001         | 0.1797                                                |
| Not competent                                                           | 2407, 3037                           | 16.2% | (14.6-17.9) | 1                  | -           |                 | 3438, 2927                           | 37.6% | (35.7-39.5) | 1                  | -           |                 |                                                       |
| Competent                                                               | 2302, 2784                           | 13.7% | (12.1-15.4) | 0.84               | (0.69-1.01) |                 | 3097, 2716                           | 30.3% | (28.4-32.3) | 0.73               | (0.65-0.83) |                 |                                                       |
| <b>Number of other sexual response problems experienced<sup>j</sup></b> |                                      |       |             |                    |             | <0.0001         |                                      |       |             |                    |             | <0.0001         | 0.0015                                                |
| 0                                                                       | 3208, 3945                           | 11.7% | (10.5-13.1) | 1                  | -           |                 | 4377, 3759                           | 25.3% | (23.8-26.9) | 1                  | -           |                 |                                                       |
| 1                                                                       | 1061, 1350                           | 10.9% | (9.0-13.2)  | 0.91               | (0.71-1.17) |                 | 1217, 1087                           | 34.8% | (31.7-38.0) | 1.55               | (1.32-1.82) |                 |                                                       |
| 2+                                                                      | 570, 678                             | 42.5% | (37.9-47.2) | 5.58               | (4.41-7.04) |                 | 1075, 909                            | 69.8% | (66.5-72.9) | 6.91               | (5.82-8.21) |                 |                                                       |
| <b>Attitudes</b>                                                        |                                      |       |             |                    |             |                 |                                      |       |             |                    |             |                 |                                                       |
| <b>People are under pressure to have sex</b>                            |                                      |       |             |                    |             | 0.0115          |                                      |       |             |                    |             | 0.0001          | 0.7970                                                |
| Else                                                                    | 1799, 2264                           | 13.1% | (11.4-15.0) | 1                  | -           |                 | 1851, 1570                           | 29.3% | (26.8-31.9) | 1                  | -           |                 |                                                       |
| Strongly agree/agree                                                    | 3038, 3707                           | 16.2% | (14.7-17.8) | 1.29               | (1.06-1.57) |                 | 4817, 4185                           | 36.0% | (34.4-37.6) | 1.34               | (1.16-1.54) |                 |                                                       |
| <b>People want less sex as they age</b>                                 |                                      |       |             |                    |             | <0.0001         |                                      |       |             |                    |             | <0.0001         | 0.9443                                                |
| Else                                                                    | 2943, 3472                           | 11.4% | (10.2-12.8) | 1                  | -           |                 | 4044, 3278                           | 27.8% | (26.2-29.4) | 1                  | -           |                 |                                                       |
| Strongly agree/agree                                                    | 1894, 2499                           | 20.0% | (18.0-22.2) | 1.93               | (1.61-2.32) |                 | 2624, 2477                           | 42.6% | (40.4-44.8) | 1.85               | (1.63-2.10) |                 |                                                       |
| <b>Men have a naturally higher sex drive than women</b>                 |                                      |       |             |                    |             | <0.0001         |                                      |       |             |                    |             | <0.0001         | <0.0001                                               |
| Else                                                                    | 2788, 3441                           | 18.0% | (16.4-19.7) | 1                  | -           |                 | 3351, 2830                           | 26.0% | (24.3-27.8) | 1                  | -           |                 |                                                       |
| Strongly agree/agree                                                    | 2049, 2530                           | 10.9% | (9.4-12.6)  | 0.56               | (0.46-0.68) |                 | 3317, 2925                           | 42.0% | (40.0-44.1) | 2.04               | (1.80-2.31) |                 |                                                       |
| <b>Too much sex in the media</b>                                        |                                      |       |             |                    |             | 0.7069          |                                      |       |             |                    |             | 0.1807          | 0.4835                                                |
| Else                                                                    | 1986, 2296                           | 14.6% | (12.8-16.6) | 1                  | -           |                 | 2091, 1618                           | 31.7% | (29.3-34.2) | 1                  | -           |                 |                                                       |
| Strongly agree/agree                                                    | 2851, 3675                           | 15.3% | (13.8-16.9) | 1.04               | (0.85-1.26) |                 | 4577, 4137                           | 35.1% | (33.5-36.8) | 1.10               | (0.96-1.26) |                 |                                                       |

1  
2  
3  
4  
5  
6  
7  
8  
9  
10  
11  
12  
13  
14  
15  
16  
17  
18  
19  
20  
21  
22  
23  
24  
25  
26  
27  
28  
29  
30  
31  
32  
33  
34  
35  
36  
37  
38  
39  
40  
41  
42  
43  
44  
45  
46  
47  
48  
49

Denominator is those aged 16-74 years with at least one partner in the past year. Unwt, unweighted; wt, weighted

<sup>a</sup> P-value for interaction to determine whether the magnitude of association between each variable and lack of interest in sex differs between men and women

<sup>b</sup> IMD is a multidimensional measure of area (neighbourhood)-level deprivation based on the participant's postcode. IMD scores for England, Scotland and Wales were adjusted before being combined and assigned to quintiles, using a method by Payne and Abel (50).

<sup>c</sup> Participants aged ≥17 years.

<sup>d</sup> Includes arthritis, heart attack, coronary heart disease, angina, other forms of heart disease, hypertension, stroke, diabetes, broken hip or pelvis, bone or hip replacement ever, backache lasting longer than 3 months, any other muscle or bone disease lasting longer than 3 months, depression, cancer and any thyroid condition treated in the past year.

<sup>e</sup> Participants were asked whether they had often been bothered by feeling down, depressed, or hopeless in the past 2 weeks, and whether they had often been bothered by little interest or pleasure in doing things in the past 2 weeks, using a validated two-question patient health questionnaire (PHQ-2).

<sup>f</sup> Opposite and/or same-sex partners

<sup>g</sup> Other means easy with a husband or wife or regular partner, but difficult with a new partner; easy with a new partner, but difficult with a husband or wife or regular partner; difficult with any partner, it depends, sometimes easy, and sometimes difficult.

<sup>h</sup> Participants were asked to rate how happy they were in their relationship from 1 (very happy) to 7 (very unhappy); responses of 1 or 2 were regarded as denoting participants who were happy with their relationship.

<sup>i</sup> A constructed variable to measure readiness, combining consensuality, autonomy of decision making, timing and use of effective contraception

<sup>j</sup> Sexual response problems (for at least 3 months in past year): lacked enjoyment in sex, felt anxious during sex, felt physical pain as a result of sex, felt no excitement or arousal during sex, difficulty in reaching climax, reached a climax more quickly than you would like, trouble getting or keep an erection (men), uncomfortably dry vagina (women)



Table 2: Factors associated with lacking interest in having sex for at least 3 months in the past year and being distressed about it in sexually active men and women

|                                                              | Men                                  |             |                  |                    |             |                 | Women                                |              |                    |                    |             |                 | <i>p</i> -value for interaction with sex <sup>a</sup> |
|--------------------------------------------------------------|--------------------------------------|-------------|------------------|--------------------|-------------|-----------------|--------------------------------------|--------------|--------------------|--------------------|-------------|-----------------|-------------------------------------------------------|
|                                                              | <i>Denom.</i><br>( <i>unwt, wt</i> ) | %           | (95%CI)          | Age-adjusted<br>OR | (95%CI)     | <i>p</i> -value | <i>Denom.</i><br>( <i>unwt, wt</i> ) | %            | (95%CI)            | Age-adjusted<br>OR | (95%CI)     | <i>p</i> -value |                                                       |
| <b>All</b>                                                   | <b>4839, 5973</b>                    | <b>8.2%</b> | <b>(7.4-9.1)</b> |                    |             |                 | <b>6669, 5755</b>                    | <b>20.8%</b> | <b>(19.6-22.0)</b> |                    |             |                 |                                                       |
| <b>Socio-demographics</b>                                    |                                      |             |                  |                    |             |                 |                                      |              |                    |                    |             |                 |                                                       |
| <b>Age group</b>                                             |                                      |             |                  |                    |             | 0.0011          |                                      |              |                    |                    |             | <0.0001         | 0.8971                                                |
| 16-24                                                        | 1279, 936                            | 4.8%        | (3.7-6.4)        | 1                  | -           |                 | 1662, 923                            | 15.2%        | (13.4-17.3)        | 1                  | -           |                 |                                                       |
| 25-34                                                        | 1376, 1238                           | 8.0%        | (6.7-9.5)        | 1.7                | (1.19-2.41) |                 | 2236, 1246                           | 20.9%        | (19.0-22.8)        | 1.47               | (1.22-1.76) |                 |                                                       |
| 35-44                                                        | 719, 1298                            | 9.6%        | (7.5-12.3)       | 2.09               | (1.40-3.13) |                 | 1050, 1290                           | 22.9%        | (20.3-25.7)        | 1.65               | (1.34-2.04) |                 |                                                       |
| 45-54                                                        | 630, 1186                            | 9.7%        | (7.4-12.6)       | 2.11               | (1.38-3.22) |                 | 871, 1186                            | 23.3%        | (20.4-26.6)        | 1.69               | (1.35-2.13) |                 |                                                       |
| 55-64                                                        | 512, 849                             | 9.4%        | (7.0-12.6)       | 2.04               | (1.30-3.21) |                 | 569, 755                             | 21.8%        | (18.3-25.8)        | 1.55               | (1.20-2.01) |                 |                                                       |
| 65-74                                                        | 323, 467                             | 5.5%        | (3.4-8.6)        | 1.13               | (0.65-1.99) |                 | 281, 355                             | 16.5%        | (12.4-21.7)        | 1.10               | (0.76-1.59) |                 |                                                       |
| <b>Index of Multiple Deprivation (quintiles)<sup>b</sup></b> |                                      |             |                  |                    |             | 0.8339          |                                      |              |                    |                    |             | 0.0938          | 0.4592                                                |
| 1 (least deprived)                                           | 977, 1279                            | 8.1%        | (6.2-10.4)       | 1                  | -           |                 | 1248, 1208                           | 23.3%        | (20.7-26.1)        | 1                  | -           |                 |                                                       |
| 2                                                            | 962, 1264                            | 7.4%        | (5.7-9.6)        | 0.92               | (0.62-1.36) |                 | 1290, 1208                           | 20.8%        | (18.2-23.5)        | 0.87               | (0.69-1.09) |                 |                                                       |
| 3                                                            | 942, 1169                            | 8.3%        | (6.4-10.6)       | 1.05               | (0.71-1.55) |                 | 1299, 1116                           | 19.6%        | (17.1-22.4)        | 0.82               | (0.65-1.03) |                 |                                                       |
| 4                                                            | 967, 1184                            | 8.8%        | (6.9-11.1)       | 1.14               | (0.78-1.66) |                 | 1384, 1137                           | 21.9%        | (19.3-24.7)        | 0.95               | (0.76-1.18) |                 |                                                       |
| 5 (most deprived)                                            | 991, 1077                            | 8.6%        | (6.7-10.9)       | 1.12               | (0.75-1.65) |                 | 1448, 1086                           | 18.2%        | (15.9-20.6)        | 0.75               | (0.60-0.94) |                 |                                                       |
| <b>Education level<sup>c</sup></b>                           |                                      |             |                  |                    |             | 0.4958          |                                      |              |                    |                    |             | 0.7324          | 0.4496                                                |
| Left school aged 17+                                         | 2862, 3464                           | 7.9%        | (6.8-9.2)        | 1                  | -           |                 | 4150, 3406                           | 20.8%        | (19.4-22.4)        | 1                  | -           |                 |                                                       |
| Left school at 16                                            | 1873, 2437                           | 8.8%        | (7.5-10.4)       | 1.09               | (0.85-1.41) |                 | 2409, 2287                           | 21.1%        | (19.3-23.1)        | 0.97               | (0.83-1.14) |                 |                                                       |
| <b>Employment status</b>                                     |                                      |             |                  |                    |             | 0.0001          |                                      |              |                    |                    |             | 0.0003          | 0.1244                                                |
| Employed                                                     | 3211, 4254                           | 8.3%        | (7.3-9.5)        | 1                  | -           |                 | 3871, 3517                           | 21.6%        | (20.1-23.2)        | 1                  | -           |                 |                                                       |
| Full-time education                                          | 542, 431                             | 4.9%        | (2.8-8.6)        | 0.74               | (0.38-1.44) |                 | 693, 423                             | 14.8%        | (11.8-18.4)        | 0.75               | (0.56-1.01) |                 |                                                       |
| Unemployed                                                   | 707, 723                             | 12.1%       | (9.5-15.3)       | 1.56               | (1.14-2.13) |                 | 1681, 1282                           | 22.3%        | (19.9-24.9)        | 1.07               | (0.90-1.27) |                 |                                                       |
| Retired                                                      | 375, 562                             | 4.9%        | (3.1-7.6)        | 0.41               | (0.23-0.71) |                 | 415, 524                             | 16.8%        | (13.4-20.8)        | 0.57               | (0.41-0.79) |                 |                                                       |
| <b>Practises religion at least once a month</b>              |                                      |             |                  |                    |             | 0.1638          |                                      |              |                    |                    |             | 0.0167          | 0.8143                                                |
| No                                                           | 4283, 5179                           | 8.5%        | (7.5-9.5)        | 1                  | -           |                 | 5659, 4754                           | 21.5%        | (20.2-22.9)        | 1                  | -           |                 |                                                       |
| Yes                                                          | 521, 748                             | 6.4%        | (4.4-9.4)        | 0.73               | (0.48-1.13) |                 | 956, 945                             | 18.0%        | (15.3-20.9)        | 0.78               | (0.63-0.96) |                 |                                                       |

Table 2 cont.

|                                                                 | Men                         |       |             |                 |             |                 | Women                       |       |             |                 |             |                 | <i>p</i> -value for interaction with sex <sup>a</sup> |
|-----------------------------------------------------------------|-----------------------------|-------|-------------|-----------------|-------------|-----------------|-----------------------------|-------|-------------|-----------------|-------------|-----------------|-------------------------------------------------------|
|                                                                 | <i>Denom.</i><br>(unwt, wt) | %     | (95%CI)     | Age-adjusted OR | (95%CI)     | <i>p</i> -value | <i>Denom.</i><br>(unwt, wt) | %     | (95%CI)     | Age-adjusted OR | (95%CI)     | <i>p</i> -value |                                                       |
| <b>Health</b>                                                   |                             |       |             |                 |             |                 |                             |       |             |                 |             |                 |                                                       |
| <b>Self-reported general health</b>                             |                             |       |             |                 |             | <0.0001         |                             |       |             |                 |             | <0.0001         | 0.0969                                                |
| Very good/Good                                                  | 4123, 5055                  | 7.0%  | (6.1-7.9)   | 1               | -           |                 | 5683, 4851                  | 19.2% | (18.0-20.5) | 1               | -           |                 |                                                       |
| Fair                                                            | 580, 745                    | 13.3% | (10.5-16.8) | 2.04            | (1.50-2.78) |                 | 780, 709                    | 27.9% | (24.3-31.9) | 1.60            | (1.30-1.97) |                 |                                                       |
| Bad/very bad                                                    | 135, 171                    | 22.6% | (15.3-32.1) | 3.85            | (2.31-6.40) |                 | 206, 195                    | 33.4% | (26.3-41.4) | 2.05            | (1.45-2.91) |                 |                                                       |
| <b>Difficulty walking up stairs because of a health problem</b> |                             |       |             |                 |             | 0.0001          |                             |       |             |                 |             | 0.0085          | 0.1553                                                |
| No difficulty                                                   | 4475, 5460                  | 7.6%  | (6.7-8.6)   | 1               | -           |                 | 6062, 5107                  | 20.1% | (18.9-21.4) | 1               | -           |                 |                                                       |
| Some difficulty                                                 | 278, 393                    | 12.3% | (8.8-17.0)  | 1.67            | (1.11-2.52) |                 | 450, 482                    | 24.1% | (20.0-28.7) | 1.21            | (0.93-1.59) |                 |                                                       |
| Much difficulty/unable to do this                               | 86, 120                     | 22.2% | (13.5-34.2) | 3.36            | (1.79-6.32) |                 | 157, 166                    | 32.3% | (24.3-41.5) | 1.81            | (1.21-2.70) |                 |                                                       |
| <b>Longstanding illness or disability</b>                       |                             |       |             |                 |             | <0.0001         |                             |       |             |                 |             | <0.0001         | 0.0345                                                |
| No                                                              | 3585, 4259                  | 6.5%  | (5.6-7.5)   | 1               | -           |                 | 4843, 4026                  | 18.7% | (17.4-20.0) | 1               | -           |                 |                                                       |
| Yes                                                             | 1253, 1713                  | 12.5% | (10.6-14.8) | 2.09            | (1.60-2.74) |                 | 1825, 1729                  | 25.7% | (23.4-28.2) | 1.48            | (1.27-1.74) |                 |                                                       |
| <b>Number of comorbid conditions<sup>d</sup></b>                |                             |       |             |                 |             | <0.0001         |                             |       |             |                 |             | <0.0001         | 0.5779                                                |
| 0                                                               | 3453, 3994                  | 6.4%  | (5.5-7.5)   | 1               | -           |                 | 4357, 3536                  | 17.3% | (15.9-18.7) | 1               | -           |                 |                                                       |
| 1                                                               | 939, 1329                   | 11.0% | (9.0-13.4)  | 1.88            | (1.37-2.57) |                 | 1555, 1416                  | 24.1% | (21.7-26.7) | 1.54            | (1.30-1.83) |                 |                                                       |
| ≥2                                                              | 446, 650                    | 13.3% | (10.1-17.4) | 2.40            | (1.61-3.59) |                 | 755, 802                    | 30.5% | (26.8-34.4) | 2.16            | (1.74-2.69) |                 |                                                       |
| <b>Depressive symptoms<sup>e</sup></b>                          |                             |       |             |                 |             | <0.0001         |                             |       |             |                 |             | <0.0001         | 0.0370                                                |
| No                                                              | 4383, 5471                  | 6.8%  | (6.0-7.7)   | 1               | -           |                 | 5885, 5149                  | 18.6% | (17.4-19.8) | 1               | -           |                 |                                                       |
| Yes                                                             | 449, 495                    | 23.7% | (19.3-28.9) | 4.36            | (3.20-5.94) |                 | 780, 602                    | 39.6% | (35.4-44.0) | 2.94            | (2.41-3.59) |                 |                                                       |
| <b>Treated for depression, past year</b>                        |                             |       |             |                 |             | <0.0001         |                             |       |             |                 |             | <0.0001         | 0.0371                                                |
| No                                                              | 4524, 5630                  | 7.3%  | (6.5-8.2)   | 1               | -           |                 | 5770, 5040                  | 18.5% | (17.3-19.8) | 1               | -           |                 |                                                       |
| Yes                                                             | 313, 342                    | 23.0% | (17.9-29.1) | 3.81            | (2.71-5.36) |                 | 897, 713                    | 36.4% | (32.9-40.2) | 2.54            | (2.12-3.03) |                 |                                                       |

Table 2 cont.

|                                                          | Men                                |       |            |                        |             |             | Women                              |       |             |                        |             |         |                                                             |
|----------------------------------------------------------|------------------------------------|-------|------------|------------------------|-------------|-------------|------------------------------------|-------|-------------|------------------------|-------------|---------|-------------------------------------------------------------|
|                                                          | <i>Denom.</i><br><i>(unwt, wt)</i> | %     | (95%CI)    | Age-<br>adjusted<br>OR | (95%CI)     | p-value     | <i>Denom.</i><br><i>(unwt, wt)</i> | %     | (95%CI)     | Age-<br>adjusted<br>OR | (95%CI)     | p-value | <i>p-value for<br/>interaction<br/>with sex<sup>a</sup></i> |
| <b>Menopausal status</b>                                 |                                    |       |            |                        |             |             |                                    |       |             |                        |             |         | 0.9656                                                      |
| Not menopausal                                           |                                    |       |            |                        |             |             | 5485, 4187                         | 20.2% | (18.9-21.5) | 1                      | -           |         |                                                             |
| Menopausal                                               |                                    |       |            |                        |             |             | 1167, 1548                         | 22.5% | (20.0-25.2) | 1.01                   | (0.76-1.32) |         |                                                             |
| <b>Circumcised</b>                                       |                                    |       |            |                        |             | 0.4097      |                                    |       |             |                        |             |         |                                                             |
| No                                                       | 3909, 4728                         | 8.3%  | (7.4-9.4)  | 1                      | -           |             |                                    |       |             |                        |             |         |                                                             |
| Yes                                                      | 857, 1166                          | 7.5%  | (5.7-9.9)  | 0.87                   | (0.62-1.22) |             |                                    |       |             |                        |             |         |                                                             |
| <b>Sexual behaviour</b>                                  |                                    |       |            |                        |             |             |                                    |       |             |                        |             |         |                                                             |
| <b>Number of occasions of sex,<br/>past 4 weeks</b>      |                                    |       |            |                        |             | <0.000<br>1 |                                    |       |             |                        |             |         | <0.0001<br>0.5496                                           |
| 0                                                        | 1013, 1163                         | 10.3% | (8.3-12.7) | 1                      | -           |             | 1408, 1245                         | 23.2% | (20.7-26.0) | 1                      | -           |         |                                                             |
| 1-2                                                      | 1160, 1566                         | 10.5% | (8.6-12.8) | 1.02                   | (0.74-1.42) |             | 1481, 1373                         | 24.2% | (21.8-26.9) | 1.06                   | (0.87-1.30) |         |                                                             |
| 3-4                                                      | 870, 1168                          | 7.4%  | (5.6-9.8)  | 0.71                   | (0.48-1.04) |             | 1240, 1130                         | 21.3% | (18.7-24.2) | 0.91                   | (0.73-1.13) |         |                                                             |
| 5+                                                       | 1617, 1869                         | 5.0%  | (3.9-6.4)  | 0.46                   | (0.33-0.66) |             | 2078, 1655                         | 14.7% | (12.9-16.7) | 0.58                   | (0.47-0.72) |         |                                                             |
| <b>Masturbation, past 4 weeks</b>                        |                                    |       |            |                        |             | 0.0164      |                                    |       |             |                        |             |         | 0.7265<br>0.0309                                            |
| No                                                       | 1297, 1828                         | 6.9%  | (5.5-8.6)  | 1                      | -           |             | 4032, 3612                         | 21.1% | (19.6-22.6) | 1                      | -           |         |                                                             |
| Yes                                                      | 3531, 4132                         | 8.8%  | (7.7-9.9)  | 1.42                   | (1.07-1.88) |             | 2615, 2114                         | 20.3% | (18.4-22.2) | 0.97                   | (0.84-1.13) |         |                                                             |
| <b>No. of sexual partners, past<br/>year<sup>f</sup></b> |                                    |       |            |                        |             | 0.2466      |                                    |       |             |                        |             |         | 0.0016<br>0.4744                                            |
| 1                                                        | 3573, 4824                         | 8.5%  | (7.5-9.6)  | 1                      | -           |             | 5440, 5012                         | 21.6% | (20.3-22.9) | 1                      | -           |         |                                                             |
| 2                                                        | 539, 513                           | 6.3%  | (4.3-9.1)  | 0.75                   | (0.49-1.14) |             | 570, 364                           | 16.7% | (13.3-20.6) | 0.75                   | (0.57-0.99) |         |                                                             |
| 3+                                                       | 718, 627                           | 6.8%  | (5.1-9.0)  | 0.82                   | (0.59-1.15) |             | 642, 366                           | 14.1% | (11.0-17.7) | 0.62                   | (0.46-0.83) |         |                                                             |
| <b>Paid for sex, past year</b>                           |                                    |       |            |                        |             | 0.4865      |                                    |       |             |                        |             |         |                                                             |
| No                                                       | 4774, 5896                         | 8.2%  | (7.4-9.2)  | 1                      | -           |             |                                    |       |             |                        |             |         |                                                             |
| Yes                                                      | 64, 75                             | 5.6%  | (1.8-16.4) | 0.66                   | (0.20-2.15) |             |                                    |       |             |                        |             |         |                                                             |
| <b>Ever taken drugs to assist<br/>sexual performance</b> |                                    |       |            |                        |             | 0.0022      |                                    |       |             |                        |             |         | 0.1055<br>0.5305                                            |
| No                                                       | 4188, 5180                         | 7.6%  | (6.7-8.6)  | 1                      | -           |             | 6478, 5624                         | 20.6% | (19.5-21.8) | 1                      | -           |         |                                                             |
| Yes                                                      | 636, 776                           | 12.1% | (9.5-15.4) | 1.63                   | (1.19-2.23) |             | 184, 124                           | 25.9% | (19.2-33.9) | 1.38                   | (0.93-2.05) |         |                                                             |

Table 2 cont.

|                                                                                | Men                                |       |             |                        |             |         | Women                              |       |             |                        |             |         |                                                             |
|--------------------------------------------------------------------------------|------------------------------------|-------|-------------|------------------------|-------------|---------|------------------------------------|-------|-------------|------------------------|-------------|---------|-------------------------------------------------------------|
|                                                                                | <i>Denom.</i><br><i>(unwt, wt)</i> | %     | (95%CI)     | Age-<br>adjusted<br>OR | (95%CI)     | p-value | <i>Denom.</i><br><i>(unwt, wt)</i> | %     | (95%CI)     | Age-<br>adjusted<br>OR | (95%CI)     | p-value | <i>p-value for<br/>interaction<br/>with sex<sup>a</sup></i> |
| <b>Relationship context</b>                                                    |                                    |       |             |                        |             |         |                                    |       |             |                        |             |         |                                                             |
| <b>Relationship status</b>                                                     |                                    |       |             |                        |             | 0.03    |                                    |       |             |                        |             | <0.0001 | 0.0307                                                      |
| Living with partner                                                            | 2708, 4266                         | 8.8%  | (7.7-10.1)  | 1                      | -           |         | 3967, 4168                         | 23.4% | (21.9-24.9) | 1                      | -           |         |                                                             |
| In a steady relationship, not<br>living together                               | 947, 760                           | 6.9%  | (5.3-9.0)   | 0.78                   | (0.56-1.09) |         | 1360, 790                          | 15.4% | (13.4-17.7) | 0.59                   | (0.49-0.71) |         |                                                             |
| Not in a steady relationship,<br>but previously cohabited                      | 446, 388                           | 8.8%  | (6.2-12.2)  | 1.00                   | (0.67-1.48) |         | 752, 462                           | 13.6% | (11.1-16.6) | 0.51                   | (0.40-0.66) |         |                                                             |
| Not in a steady relationship,<br>never cohabited                               | 727, 551                           | 4.7%  | (3.3-6.8)   | 0.52                   | (0.34-0.81) |         | 580, 330                           | 11.0% | (8.2-14.5)  | 0.39                   | (0.28-0.55) |         |                                                             |
| <b>Duration of most recent<br/>sexual relationship</b>                         |                                    |       |             |                        |             | 0.0143  |                                    |       |             |                        |             | <0.0001 | 0.0719                                                      |
| 1 year or less                                                                 | 1462, 1260                         | 5.5%  | (4.3-7.1)   | 1                      | -           |         | 1597, 998                          | 11.2% | (9.4-13.2)  | 1                      | -           |         |                                                             |
| Between 1 and 5 years                                                          | 1247, 1227                         | 9.0%  | (7.3-11.0)  | 1.67                   | (1.18-2.36) |         | 1758, 1148                         | 18.5% | (16.5-20.7) | 1.81                   | (1.44-2.29) |         |                                                             |
| Between 5 and 15 years                                                         | 1065, 1484                         | 9.3%  | (7.5-11.6)  | 1.68                   | (1.17-2.43) |         | 1774, 1458                         | 25.2% | (23.0-27.6) | 2.81                   | (2.23-3.55) |         |                                                             |
| Over 15 years                                                                  | 1004, 1904                         | 8.8%  | (7.1-10.8)  | 1.47                   | (0.97-2.22) |         | 1445, 2036                         | 23.8% | (21.5-26.2) | 2.83                   | (2.13-3.75) |         |                                                             |
| <b>Always easy to talk about<br/>sex with partners<sup>e</sup></b>             |                                    |       |             |                        |             | 0       |                                    |       |             |                        |             | <0.0001 | 0.4854                                                      |
| Yes                                                                            | 1695, 1899                         | 4.8%  | (3.8-6.0)   | 1                      | -           |         | 1746, 1451                         | 11.4% | (9.7-13.2)  | 1                      | -           |         |                                                             |
| No/other                                                                       | 3122, 4048                         | 9.8%  | (8.7-11.1)  | 2.15                   | (1.62-2.87) |         | 4907, 4289                         | 23.9% | (22.5-25.3) | 2.43                   | (2.02-2.93) |         |                                                             |
| <b>Happy with relationship<sup>h</sup></b>                                     |                                    |       |             |                        |             | <0.0001 |                                    |       |             |                        |             | <0.0001 | 0.9717                                                      |
| Yes                                                                            | 1951, 2791                         | 7.1%  | (5.9-8.6)   | 1                      | -           |         | 2736, 2601                         | 18.6% | (16.9-20.4) | 1                      | -           |         |                                                             |
| Other                                                                          | 995, 1430                          | 13.3% | (11.2-15.8) | 2.01                   | (1.51-2.66) |         | 1640, 1617                         | 31.4% | (28.8-34.0) | 2.00                   | (1.69-2.37) |         |                                                             |
| <b>Participant does not share same level of<br/>interest in sex as partner</b> |                                    |       |             |                        |             | 0.0311  |                                    |       |             |                        |             | <0.0001 |                                                             |
| No/other                                                                       | 2270, 3233                         | 8.5%  | (7.2-10.0)  | 1                      | -           |         | 3211, 3064                         | 15.0% | (13.6-16.4) | 1                      | -           |         |                                                             |
| Yes                                                                            | 676, 988                           | 11.6% | (9.2-14.4)  | 1.41                   | (1.03-1.92) |         | 1166, 1155                         | 46.2% | (42.9-49.6) | 4.91                   | (4.13-5.83) |         |                                                             |

Table 2 cont.

|                                                                               | Men                                |       |             |                        |             |         | Women                              |       |             |                        |             |         |                                                             |
|-------------------------------------------------------------------------------|------------------------------------|-------|-------------|------------------------|-------------|---------|------------------------------------|-------|-------------|------------------------|-------------|---------|-------------------------------------------------------------|
|                                                                               | <i>Denom.</i><br><i>(unwt, wt)</i> | %     | (95%CI)     | Age-<br>adjusted<br>OR | (95%CI)     | p-value | <i>Denom.</i><br><i>(unwt, wt)</i> | %     | (95%CI)     | Age-<br>adjusted<br>OR | (95%CI)     | p-value | <i>p-value for<br/>interaction<br/>with sex<sup>a</sup></i> |
| <b>Participant does not share same sexual likes &amp; dislikes as partner</b> |                                    |       |             |                        |             | 0.0975  |                                    |       |             |                        |             | <0.0001 | 0.0212                                                      |
| No/other                                                                      | 2650, 3803                         | 8.9%  | (7.7-10.2)  | 1                      | -           |         | 4079, 3908                         | 22.1% | (20.6-23.6) | 1                      | -           |         |                                                             |
| Yes                                                                           | 296, 418                           | 12.2% | (8.6-17.0)  | 1.43                   | (0.94-2.18) |         | 297, 310                           | 41.9% | (35.6-48.6) | 2.55                   | (1.93-3.37) |         |                                                             |
| <b>Partner experienced sexual difficulties in past year</b>                   |                                    |       |             |                        |             | 0.0027  |                                    |       |             |                        |             | <0.0001 | 0.6889                                                      |
| No/other                                                                      | 2431, 3454                         | 8.3%  | (7.2-9.6)   | 1                      | -           |         | 3726, 3498                         | 22.1% | (20.6-23.7) | 1                      | -           |         |                                                             |
| Yes                                                                           | 513, 763                           | 13.2% | (10.2-17.0) | 1.68                   | (1.20-2.35) |         | 649, 719                           | 30.4% | (26.5-34.6) | 1.58                   | (1.27-1.95) |         |                                                             |
| <b>Does not feel emotionally close to partner when have sex</b>               |                                    |       |             |                        |             | 0.0225  |                                    |       |             |                        |             | <0.0001 | 0.8228                                                      |
| No/other                                                                      | 2904, 4165                         | 9.1%  | (7.9-10.3)  | 1                      | -           |         | 4263, 4108                         | 22.9% | (21.5-24.4) | 1                      | -           |         |                                                             |
| Yes                                                                           | 42, 56                             | 21.0% | (10.2-38.3) | 2.69                   | (1.15-6.29) |         | 112, 109                           | 47.0% | (36.4-57.8) | 2.98                   | (1.92-4.63) |         |                                                             |
| <b>Lifestyle</b>                                                              |                                    |       |             |                        |             |         |                                    |       |             |                        |             |         |                                                             |
| <b>1+ child(ren) aged &lt;5 in household</b>                                  |                                    |       |             |                        |             | 0.1047  |                                    |       |             |                        |             | 0.0004  | 0.0042                                                      |
| No, none                                                                      | 4100, 5015                         | 8.6%  | (7.6-9.6)   | 1                      | -           |         | 4997, 4671                         | 20.2% | (18.9-21.5) | 1                      | -           |         |                                                             |
| Yes, 1+                                                                       | 727, 941                           | 6.3%  | (4.6-8.5)   | 0.75                   | (0.52-1.06) |         | 1664, 1074                         | 23.5% | (21.2-25.9) | 1.34                   | (1.14-1.58) |         |                                                             |
| <b>Pregnant in the last year</b>                                              |                                    |       |             |                        |             |         |                                    |       |             |                        |             | 0.5927  |                                                             |
| No                                                                            |                                    |       |             |                        |             |         | 4227, 4122                         | 21.8% | (20.4-23.4) | 1                      | -           |         |                                                             |
| Yes                                                                           |                                    |       |             |                        |             |         | 437, 273                           | 20.7% | (16.6-25.6) | 0.92                   | (0.69-1.24) |         |                                                             |
| <b>Used hormonal contraceptive, past year</b>                                 |                                    |       |             |                        |             |         |                                    |       |             |                        |             | 0.1141  |                                                             |
| No                                                                            |                                    |       |             |                        |             |         | 3759, 3838                         | 20.7% | (19.2-22.3) | 1                      | -           |         |                                                             |
| Yes                                                                           |                                    |       |             |                        |             |         | 2806, 1831                         | 20.9% | (19.1-22.7) | 1.14                   | (0.97-1.35) |         |                                                             |
| <b>Sexual health indicators</b>                                               |                                    |       |             |                        |             |         |                                    |       |             |                        |             |         |                                                             |
| <b>Ever diagnosed with a sexually transmitted infection</b>                   |                                    |       |             |                        |             | <0.0001 |                                    |       |             |                        |             | 0.0002  | 0.0291                                                      |
| No (or only thrush)                                                           | 4148, 5128                         | 7.3%  | (6.5-8.3)   | 1                      | -           |         | 5455, 4861                         | 20.0% | (18.7-21.3) | 1                      | -           |         |                                                             |
| Yes (excluding thrush)                                                        | 677, 830                           | 13.7% | (11.0-17.0) | 2.02                   | (1.51-2.70) |         | 1206, 888                          | 25.1% | (22.3-28.1) | 1.39                   | (1.16-1.65) |         |                                                             |

Table 2 cont.

|                                                                         | Men                         |       |             |                    |              |                 | Women                       |       |             |                    |             |                 | <i>p</i> -value for interaction with sex <sup>a</sup> |
|-------------------------------------------------------------------------|-----------------------------|-------|-------------|--------------------|--------------|-----------------|-----------------------------|-------|-------------|--------------------|-------------|-----------------|-------------------------------------------------------|
|                                                                         | <i>Denom.</i><br>(unwt, wt) | %     | (95%CI)     | Age-adjusted<br>OR | (95%CI)      | <i>p</i> -value | <i>Denom.</i><br>(unwt, wt) | %     | (95%CI)     | Age-adjusted<br>OR | (95%CI)     | <i>p</i> -value |                                                       |
| <b>Ever experienced non-volitional sex</b>                              |                             |       |             |                    |              | <0.0001         |                             |       |             |                    |             | <0.0001         | 0.1143                                                |
| No                                                                      | 4706, 5825                  | 7.9%  | (7.1-8.9)   | 1                  | -            |                 | 5815, 5055                  | 19.4% | (18.2-20.7) | 1                  | -           |                 |                                                       |
| Yes/Don't know                                                          | 133, 148                    | 19.4% | (13.1-27.7) | 2.83               | (1.74-4.59)  |                 | 848, 695                    | 30.9% | (27.3-34.6) | 1.86               | (1.55-2.25) |                 |                                                       |
| <b>Sexual competence at first sex<sup>l</sup></b>                       |                             |       |             |                    |              | 0.4876          |                             |       |             |                    |             | <0.0001         | 0.0787                                                |
| Not competent                                                           | 2408, 3039                  | 8.7%  | (7.5-10.0)  | 1                  | -            |                 | 3438, 2927                  | 23.6% | (21.9-25.3) | 1                  | -           |                 |                                                       |
| Competent                                                               | 2302, 2784                  | 7.8%  | (6.6-9.2)   | 0.91               | (0.71-1.18)  |                 | 3097, 2716                  | 17.7% | (16.1-19.3) | 0.70               | (0.61-0.81) |                 |                                                       |
| <b>Number of other sexual response problems experienced<sup>l</sup></b> |                             |       |             |                    |              | <0.0001         |                             |       |             |                    |             | <0.0001         | 0.0262                                                |
| 0                                                                       | 3209, 3947                  | 5.3%  | (4.4-6.3)   | 1                  | -            |                 | 4377, 3759                  | 12.9% | (11.7-14.1) | 1                  | -           |                 |                                                       |
| 1                                                                       | 1061, 1350                  | 6.1%  | (4.7-7.8)   | 1.14               | (0.81-1.59)  |                 | 1217, 1087                  | 21.7% | (19.0-24.6) | 1.86               | (1.53-2.26) |                 |                                                       |
| 2+                                                                      | 570, 678                    | 29.7% | (25.4-34.4) | 7.57               | (5.68-10.10) |                 | 1075, 909                   | 52.4% | (48.9-56.0) | 7.48               | (6.25-8.94) |                 |                                                       |
| <b>Attitudes</b>                                                        |                             |       |             |                    |              |                 |                             |       |             |                    |             |                 |                                                       |
| <b>People are under pressure to have sex</b>                            |                             |       |             |                    |              | 0.1437          |                             |       |             |                    |             | <0.0001         | 0.2192                                                |
| Else                                                                    | 1799, 2264                  | 7.4%  | (6.0-9.0)   | 1                  | -            |                 | 1851, 1570                  | 16.4% | (14.5-18.5) | 1                  | -           |                 |                                                       |
| Strongly agree/agree                                                    | 3038, 3707                  | 8.7%  | (7.6-9.9)   | 1.21               | (0.94-1.57)  |                 | 4817, 4185                  | 22.4% | (21.0-23.9) | 1.47               | (1.24-1.74) |                 |                                                       |
| <b>People want less sex as they age</b>                                 |                             |       |             |                    |              | 0.0005          |                             |       |             |                    |             | <0.0001         | 0.8045                                                |
| Else                                                                    | 2943, 3472                  | 6.7%  | (5.7-7.8)   | 1                  | -            |                 | 4044, 3278                  | 17.1% | (15.8-18.6) | 1                  | -           |                 |                                                       |
| Strongly agree/agree                                                    | 1894, 2499                  | 10.3% | (8.8-12.1)  | 1.58               | (1.22-2.04)  |                 | 2624, 2477                  | 25.6% | (23.7-27.6) | 1.64               | (1.43-1.90) |                 |                                                       |
| <b>Men have a naturally higher sex drive than women</b>                 |                             |       |             |                    |              |                 |                             |       |             |                    |             | <0.0001         | <0.0001                                               |
| Else                                                                    | 2788, 3441                  | 10.2% | (8.9-11.5)  | 1                  | -            |                 | 3351, 2830                  | 15.9% | (14.4-17.4) | 1                  | -           |                 |                                                       |
| Strongly agree/agree                                                    | 2049, 2530                  | 5.5%  | (4.4-6.9)   | 0.52               | (0.39-0.68)  |                 | 3317, 2925                  | 25.5% | (23.8-27.4) | 1.81               | (1.56-2.09) |                 |                                                       |
| <b>Too much sex in the media</b>                                        |                             |       |             |                    |              | 0.3477          |                             |       |             |                    |             | 0.0693          | 0.8856                                                |
| Else                                                                    | 1986, 2296                  | 7.5%  | (6.3-9.0)   | 1                  | -            |                 | 2091, 1618                  | 18.8% | (16.8-20.9) | 1                  | -           |                 |                                                       |
| Strongly agree/agree                                                    | 2851, 3675                  | 8.6%  | (7.5-9.9)   | 1.13               | (0.88-1.46)  |                 | 4577, 4137                  | 21.6% | (20.2-23.0) | 1.16               | (0.99-1.36) |                 |                                                       |

Denominator is those aged 16-74 years with at least one partner in the past year. Unwt, unweighted; wt, weighted

<sup>a</sup> P-value for interaction to determine whether the magnitude of association between each variable and lack of interest in sex differs between men and women

1  
2  
3  
4  
5 <sup>b</sup> IMD is a multidimensional measure of area (neighbourhood)-level deprivation based on the participant's postcode. IMD scores for England, Scotland and Wales were adjusted before being  
6 combined and assigned to quintiles, using a method by Payne and Abel (50).

7 <sup>c</sup> Participants aged ≥17 years.

8  
9 <sup>d</sup> Includes arthritis, heart attack, coronary heart disease, angina, other forms of heart disease, hypertension, stroke, diabetes, broken hip or pelvis, bone or hip replacement ever, backache  
10 lasting longer than 3 months, any other muscle or bone disease lasting longer than 3 months, depression, cancer and any thyroid condition treated in the past year.

11 <sup>e</sup> Participants were asked whether they had often been bothered by feeling down, depressed, or hopeless in the past 2 weeks, and whether they had often been bothered by little interest or  
12 pleasure in doing things in the past 2 weeks, using a validated two-question patient health questionnaire (PHQ-2).

13 <sup>f</sup> Opposite and/or same-sex partners

14 <sup>g</sup> Other means easy with a husband or wife or regular partner, but difficult with a new partner; easy with a new partner, but difficult with a husband or wife or regular partner; difficult with any  
15 partner, it depends, sometimes easy, and sometimes difficult.

16 <sup>h</sup> Participants were asked to rate how happy they were in their relationship from 1 (very happy) to 7 (very unhappy); responses of 1 or 2 were regarded as denoting participants who were happy  
17 with their relationship.

18 <sup>i</sup> A constructed variable to measure readiness, combining consensuality, autonomy of decision making, timing and use of effective contraception

19  
20 <sup>j</sup> Sexual response problems (for at least 3 months in past year): lacked enjoyment in sex, felt anxious during sex, felt physical pain as a result of sex, felt no excitement or arousal during sex,  
21 difficulty in reaching climax, reached a climax more quickly than you would like, trouble getting or keep an erection (men), uncomfortably dry vagina (women)

Table 3: Associations between reporting lack of interest in having sex for at least 3 months in the past year and other sexual response problems lasting 3 months or more in the past year, by sex

|                                                        | Men                                   |             |                                    |             |                  | Women        |         |                                          |       |                                    |         |              |
|--------------------------------------------------------|---------------------------------------|-------------|------------------------------------|-------------|------------------|--------------|---------|------------------------------------------|-------|------------------------------------|---------|--------------|
|                                                        | Did not report a lack interest in sex |             | Reported a lack of interest in sex |             | AOR <sup>a</sup> | (95%CI)      | p-value | Did not report a lack of interest in sex |       | Reported a lack of interest in sex |         | (95%CI)      |
| Denominators (unwt, wt)                                | 4126, 5077                            |             | 713, 897                           |             |                  |              |         | 4540, 3790                               |       | 2129, 1965                         |         |              |
| <b>Lacked enjoyment in having sex</b>                  |                                       |             |                                    |             |                  |              |         |                                          |       |                                    | <0.0001 | <0.0001      |
| No                                                     | 97.7%                                 | (97.1-98.1) | 81.5%                              | (78.2-84.4) | 1                | -            | 95.9%   | (95.1-96.5)                              | 72.5% | (70.2-74.7)                        | 1       | -            |
| Yes                                                    | 2.3%                                  | (1.9-2.9)   | 18.5%                              | (15.6-21.8) | 9.78             | (7.11-13.46) | 4.1%    | (3.5-4.9)                                | 27.5% | (25.3-29.8)                        | 8.95    | (7.28-11.01) |
| <b>Felt anxious during sex</b>                         |                                       |             |                                    |             |                  |              |         |                                          |       |                                    | <0.0001 | <0.0001      |
| No                                                     | 96.1%                                 | (95.5-96.7) | 85.8%                              | (82.6-88.5) | 1                | -            | 97.3%   | (96.7-97.7)                              | 89.9% | (88.4-91.3)                        | 1       | -            |
| Yes                                                    | 3.9%                                  | (3.3-4.5)   | 14.2%                              | (11.5-17.4) | 4.16             | (3.08-5.62)  | 2.7%    | (2.3-3.3)                                | 10.1% | (8.7-11.6)                         | 4.4     | (3.43-5.65)  |
| <b>Felt physical pain as a result of sex</b>           |                                       |             |                                    |             |                  |              |         |                                          |       |                                    | 0.0213  | <0.0001      |
| No                                                     | 98.4%                                 | (97.9-98.8) | 97.1%                              | (95.6-98.1) | 1                | -            | 95.7%   | (95.0-96.3)                              | 86.5% | (84.6-88.1)                        | 1       | -            |
| Yes                                                    | 1.6%                                  | (1.2-2.1)   | 2.9%                               | (1.9-4.4)   | 1.87             | (1.10-3.19)  | 4.3%    | (3.7-5.0)                                | 13.5% | (11.9-15.4)                        | 3.55    | (2.83-4.45)  |
| <b>Felt no excitement or arousal during sex</b>        |                                       |             |                                    |             |                  |              |         |                                          |       |                                    | <0.0001 | <0.0001      |
| No                                                     | 98.5%                                 | (98.0-98.9) | 87.7%                              | (85.0-90.0) | 1                | -            | 97.5%   | (96.9-97.9)                              | 80.9% | (79.0-82.7)                        | 1       | -            |
| Yes                                                    | 1.5%                                  | (1.1-2.0)   | 12.3%                              | (10.0-15.0) | 9.21             | (6.33-13.40) | 2.5%    | (2.1-3.1)                                | 19.1% | (17.3-21.0)                        | 9.16    | (7.16-11.70) |
| <b>Difficulty in reaching climax</b>                   |                                       |             |                                    |             |                  |              |         |                                          |       |                                    | <0.0001 | <0.0001      |
| No                                                     | 92.7%                                 | (91.7-93.5) | 80.5%                              | (76.6-83.8) | 1                | -            | 88.3%   | (87.2-89.3)                              | 74.9% | (72.7-76.9)                        | 1       | -            |
| Yes                                                    | 7.3%                                  | (6.5-8.3)   | 19.5%                              | (16.2-23.4) | 3.08             | (2.37-3.99)  | 11.7%   | (10.7-12.8)                              | 25.1% | (23.1-27.3)                        | 2.6     | (2.23-3.03)  |
| <b>Reached climax more quickly than you would like</b> |                                       |             |                                    |             |                  |              |         |                                          |       |                                    | 0.0198  | 0.3658       |
| No                                                     | 85.6%                                 | (84.3-86.9) | 82.0%                              | (78.7-85.0) | 1                | -            | 97.8%   | (97.2-98.2)                              | 97.5% | (96.7-98.1)                        | 1       | -            |
| Yes                                                    | 14.4%                                 | (13.1-15.7) | 18.0%                              | (15.0-21.3) | 1.32             | (1.05-1.68)  | 2.2%    | (1.8-2.8)                                | 2.5%  | (1.9-3.3)                          | 1.18    | (0.82-1.69)  |
| <b>Trouble getting or keeping an erection</b>          |                                       |             |                                    |             |                  |              |         |                                          |       |                                    | <0.0001 |              |
| No                                                     | 88.5%                                 | (87.3-89.6) | 79.4%                              | (75.9-82.6) | 1                | -            |         |                                          |       |                                    |         |              |
| Yes                                                    | 11.5%                                 | (10.4-12.7) | 20.6%                              | (17.4-24.1) | 1.97             | (1.55-2.51)  |         |                                          |       |                                    |         |              |
| <b>Uncomfortably dry vagina</b>                        |                                       |             |                                    |             |                  |              |         |                                          |       |                                    | <0.0001 |              |
| No                                                     |                                       |             |                                    |             |                  |              | 90.7%   | (89.5-91.7)                              | 80.1% | (77.9-82.1)                        | 1       | -            |
| Yes                                                    |                                       |             |                                    |             |                  |              | 9.3%    | (8.3-10.5)                               | 19.9% | (17.9-22.1)                        | 2.28    | (1.89-2.76)  |

Denominator is those aged 16-74 years with at least one partner in the past year. Unwt, unweighted; wt, weighted

AOR comparing those reporting lacking interest to those who did not.



## STROBE Statement—checklist of items that should be included in reports of observational studies

|                           | Item No. | Recommendation                                                                                      | Page No.        | Relevant text from manuscript                                                                                                                                                                                                                                                                                                                                                                                                  |
|---------------------------|----------|-----------------------------------------------------------------------------------------------------|-----------------|--------------------------------------------------------------------------------------------------------------------------------------------------------------------------------------------------------------------------------------------------------------------------------------------------------------------------------------------------------------------------------------------------------------------------------|
| <b>Title and abstract</b> | 1        | (a) Indicate the study's design with a commonly used term in the title or the abstract              | Title, Abstract | Survey; cross-sectional probability sample survey                                                                                                                                                                                                                                                                                                                                                                              |
|                           |          | (b) Provide in the abstract an informative and balanced summary of what was done and what was found | Abstract        | Complex survey analyses of data collected for a cross-sectional probability sample survey, undertaken 2010-12, specifically logistic regression to calculate age-adjusted odds ratios (AOR) to identify associated factors                                                                                                                                                                                                     |
| <b>Introduction</b>       |          |                                                                                                     |                 |                                                                                                                                                                                                                                                                                                                                                                                                                                |
| Background/rationale      | 2        | Explain the scientific background and rationale for the investigation being reported                | 4-5             | In summary, the evidence on the factors associated with men's and women's reports of low sexual desire is drawn largely from non-representative samples, is somewhat equivocal and, in men, sparse. Understanding the correlates of lacking interest in sex would be useful to identify individuals most at risk of sexual problems and could also inform what types of therapeutic options for this group should be provided. |
| Objectives                | 3        | State specific objectives, including any prespecified hypotheses                                    | 5               | The research questions addressed in this paper are: (1)                                                                                                                                                                                                                                                                                                                                                                        |

1  
2  
3  
4  
5  
6  
7  
8  
9  
10  
11  
12  
13  
14  
15  
16  
17  
18  
19  
20  
21  
22  
23  
24  
25  
26  
27  
28  
29  
30  
31  
32  
33  
34  
35  
36  
37  
38  
39  
40  
41  
42  
43  
44  
45  
46  
47  
48  
49

For peer review only

What sociodemographic, relationship, sexual behaviour, and sexual attitudinal factors are associated with lacking interest in sex in sexually active men and women?; (2) To what extent do these factors vary by gender?; (3) What are the associations between reporting lacking interest in sex and other sexual function problems?

**Methods**

|              |   |                                                                                                                                                                                                                                                  |   |                                                                                                                                                                                                                                  |
|--------------|---|--------------------------------------------------------------------------------------------------------------------------------------------------------------------------------------------------------------------------------------------------|---|----------------------------------------------------------------------------------------------------------------------------------------------------------------------------------------------------------------------------------|
| Study design | 4 | Present key elements of study design early in the paper                                                                                                                                                                                          | 6 | A multi-stage, clustered, and stratified probability sample design was used and participants were interviewed using a combination of computer-assisted personal interviews (CAPI), and computer-assisted self-interviews (CASI). |
| Setting      | 5 | Describe the setting, locations, and relevant dates, including periods of recruitment, exposure, follow-up, and data collection                                                                                                                  | 6 | Natsal-3 is a probability sample survey of 15,162 men and women aged 16-74 years in Britain, interviewed between September 2010 and August 2012.                                                                                 |
| Participants | 6 | (a) <i>Cohort study</i> —Give the eligibility criteria, and the sources and methods of selection of participants. Describe methods of follow-up<br><i>Case-control study</i> —Give the eligibility criteria, and the sources and methods of case | 6 | For the current analyses, only respondents who reported >=1 sexual partner (opposite-sex or                                                                                                                                      |

|                              |    |                                                                                                                                                                                                                        |     |                                                                                                                                                                                                                                                                                                                                                                                                                                                                                                        |
|------------------------------|----|------------------------------------------------------------------------------------------------------------------------------------------------------------------------------------------------------------------------|-----|--------------------------------------------------------------------------------------------------------------------------------------------------------------------------------------------------------------------------------------------------------------------------------------------------------------------------------------------------------------------------------------------------------------------------------------------------------------------------------------------------------|
|                              |    | ascertainment and control selection. Give the rationale for the choice of cases and controls<br><i>Cross-sectional study</i> —Give the eligibility criteria, and the sources and methods of selection of participants  |     | same-sex) in the past year were included (4,839 men and 6,669 women).                                                                                                                                                                                                                                                                                                                                                                                                                                  |
|                              |    | (b) <i>Cohort study</i> —For matched studies, give matching criteria and number of exposed and unexposed<br><i>Case-control study</i> —For matched studies, give matching criteria and the number of controls per case |     |                                                                                                                                                                                                                                                                                                                                                                                                                                                                                                        |
| Variables                    | 7  | Clearly define all outcomes, exposures, predictors, potential confounders, and effect modifiers. Give diagnostic criteria, if applicable                                                                               | 6-7 | We used selected items from the Natsal-SF, a newly developed and validated measure of sexual function comprising questions about problems with sexual response, relational aspects of sexual function, and self-appraisal of sex life                                                                                                                                                                                                                                                                  |
| Data sources/<br>measurement | 8* | For each variable of interest, give sources of data and details of methods of assessment (measurement). Describe comparability of assessment methods if there is more than one group                                   | 6-7 | In the CASI, participants who reported at least one sexual partner in the past year (hereon ‘sexually active participants’) were asked: ‘ <i>In the last year, have you experienced any of the following for a period of 3 months or longer?</i> ’ and were given a list of difficulties and asked to indicate which they had experienced. The list included ‘ <i>Lacked interest in having sex</i> ’. Those indicating this difficulty were defined as lacking interest in having sex for a period of |

1  
2  
3  
4  
5  
6  
7  
8  
9  
10  
11  
12  
13  
14  
15  
16  
17  
18  
19  
20  
21  
22  
23  
24  
25  
26  
27  
28  
29  
30  
31  
32  
33  
34  
35  
36  
37  
38  
39  
40  
41  
42  
43  
44  
45  
46  
47  
48  
49

For peer review only

three months or more in the past year (the outcome for this analysis). Individuals reporting lacking interest in sex for at least 3 months were then asked 'And how do you feel about this?' with response options: *not at all distressed, a little distressed, fairly distressed; very distressed*. Those answering a little, fairly or very distressed were defined as lacking interest in sex and having distress about this symptom (outcome for sensitivity analysis, see below).

---

|            |    |                                                           |   |
|------------|----|-----------------------------------------------------------|---|
| Bias       | 9  | Describe any efforts to address potential sources of bias | - |
| Study size | 10 | Explain how the study size was arrived at                 | - |

---

Continued on next page

|                        |    |                                                                                                                                                                                                                                                                                                           |   |                                                                                                                                                                                                                                                                                                                                                                                                                                                                                                                           |
|------------------------|----|-----------------------------------------------------------------------------------------------------------------------------------------------------------------------------------------------------------------------------------------------------------------------------------------------------------|---|---------------------------------------------------------------------------------------------------------------------------------------------------------------------------------------------------------------------------------------------------------------------------------------------------------------------------------------------------------------------------------------------------------------------------------------------------------------------------------------------------------------------------|
| Quantitative variables | 11 | Explain how quantitative variables were handled in the analyses. If applicable, describe which groupings were chosen and why                                                                                                                                                                              | 7 | All analyses were done using the complex survey functions of STATA (version 14; StataCorp LP, College Station, Texas) to account for the weighting, clustering, and stratification of the data.                                                                                                                                                                                                                                                                                                                           |
| Statistical methods    | 12 | (a) Describe all statistical methods, including those used to control for confounding                                                                                                                                                                                                                     | 7 | We used multivariable logistic regression to calculate age-adjusted odds ratios (AOR) to examine the associations between reports of lacking interest in sex lasting three months or longer in the past year, and sociodemographic, health, relationship, sexual behaviour, and sexual attitude variables. For each variable, we also tested the interaction between gender, to see if the magnitude of the associations between the above factors and reports of lacking interest in sex was the same for men and women. |
|                        |    | (b) Describe any methods used to examine subgroups and interactions                                                                                                                                                                                                                                       | 7 | -                                                                                                                                                                                                                                                                                                                                                                                                                                                                                                                         |
|                        |    | (c) Explain how missing data were addressed                                                                                                                                                                                                                                                               | - | -                                                                                                                                                                                                                                                                                                                                                                                                                                                                                                                         |
|                        |    | (d) <i>Cohort study</i> —If applicable, explain how loss to follow-up was addressed<br><i>Case-control study</i> —If applicable, explain how matching of cases and controls was addressed<br><i>Cross-sectional study</i> —If applicable, describe analytical methods taking account of sampling strategy |   |                                                                                                                                                                                                                                                                                                                                                                                                                                                                                                                           |
|                        |    | (e) Describe any sensitivity analyses                                                                                                                                                                                                                                                                     | 7 | We conducted a sensitivity analysis for the outcome variable reporting lack of interest in sex lasting three months or longer <i>and</i> distress about                                                                                                                                                                                                                                                                                                                                                                   |

1  
2  
3  
4  
5  
6  
7  
8  
9  
10  
11  
12  
13  
14  
15  
16  
17  
18  
19  
20  
21  
22  
23  
24  
25  
26  
27  
28  
29  
30  
31  
32  
33  
34  
35  
36  
37  
38  
39  
40  
41  
42  
43  
44  
45  
46  
47  
48  
49

this symptom to assess whether similar associations were found.

| <b>Results</b>   |     |                                                                                                                                                                                                              |            |                                                                                                                                                                          |
|------------------|-----|--------------------------------------------------------------------------------------------------------------------------------------------------------------------------------------------------------------|------------|--------------------------------------------------------------------------------------------------------------------------------------------------------------------------|
| Participants     | 13* | (a) Report numbers of individuals at each stage of study—eg numbers potentially eligible, examined for eligibility, confirmed eligible, included in the study, completing follow-up, and analysed            | 6          | For the current analyses, only respondents who reported $\geq 1$ sexual partner (opposite-sex or same-sex) in the past year were included (4,839 men and 6,669 women).   |
|                  |     | (b) Give reasons for non-participation at each stage                                                                                                                                                         | -          |                                                                                                                                                                          |
|                  |     | (c) Consider use of a flow diagram                                                                                                                                                                           | -          |                                                                                                                                                                          |
| Descriptive data | 14* | (a) Give characteristics of study participants (eg demographic, clinical, social) and information on exposures and potential confounders                                                                     | 6          | More extensive details of the survey methodology and sample characteristics are published elsewhere (21,22) and for demographic characteristics of the sample, see (22). |
|                  |     | (b) Indicate number of participants with missing data for each variable of interest                                                                                                                          | -          |                                                                                                                                                                          |
|                  |     | (c) <i>Cohort study</i> —Summarise follow-up time (eg, average and total amount)                                                                                                                             |            |                                                                                                                                                                          |
| Outcome data     | 15* | <i>Cohort study</i> —Report numbers of outcome events or summary measures over time                                                                                                                          |            |                                                                                                                                                                          |
|                  |     | <i>Case-control study</i> —Report numbers in each exposure category, or summary measures of exposure                                                                                                         |            |                                                                                                                                                                          |
|                  |     | <i>Cross-sectional study</i> —Report numbers of outcome events or summary measures                                                                                                                           | Tables 1-2 |                                                                                                                                                                          |
| Main results     | 16  | (a) Give unadjusted estimates and, if applicable, confounder-adjusted estimates and their precision (eg, 95% confidence interval). Make clear which confounders were adjusted for and why they were included | Tables 1-2 |                                                                                                                                                                          |
|                  |     | (b) Report category boundaries when continuous variables were categorized                                                                                                                                    | -          |                                                                                                                                                                          |
|                  |     | (c) If relevant, consider translating estimates of relative risk into absolute risk for a meaningful time period                                                                                             | -          |                                                                                                                                                                          |

Continued on next page

|                                                                                                                                  |                   |    |                                                                                                                                                            |       |                                                                                                                                                                                                                                                                                                                                                                                                                                                                                                                                                               |
|----------------------------------------------------------------------------------------------------------------------------------|-------------------|----|------------------------------------------------------------------------------------------------------------------------------------------------------------|-------|---------------------------------------------------------------------------------------------------------------------------------------------------------------------------------------------------------------------------------------------------------------------------------------------------------------------------------------------------------------------------------------------------------------------------------------------------------------------------------------------------------------------------------------------------------------|
| 1<br>2<br>3<br>4<br>5<br>6<br>7<br>8<br>9<br>10<br>11<br>12                                                                      | Other analyses    | 17 | Report other analyses done—eg analyses of subgroups and interactions, and sensitivity analyses                                                             | 11    | Table 2 presents the associations between lacking interest in sex and being distressed about this (as a measure/marker of severity), and the above sociodemographic, health, and sexual relationship/behaviour variables.                                                                                                                                                                                                                                                                                                                                     |
| 13                                                                                                                               | <b>Discussion</b> |    |                                                                                                                                                            |       |                                                                                                                                                                                                                                                                                                                                                                                                                                                                                                                                                               |
| 14<br>15<br>16<br>17<br>18<br>19<br>20<br>21<br>22<br>23<br>24<br>25<br>26<br>27<br>28<br>29<br>30<br>31<br>32<br>33<br>34<br>35 | Key results       | 18 | Summarise key results with reference to study objectives                                                                                                   | 11-12 | We identified a broad range of factors, including some that have not been explored in previous large-scale surveys, that were associated with men's and women's reports of lacking interest in sex in a representative British population-based survey. Our findings, discussed below, revealed some gender similarities as well as some interesting gender differences. The strongest evidence for gender differences was for the relationship context variables, where associations with lacking interest in sex were much stronger for women than for men. |
| 36<br>37<br>38<br>39<br>40<br>41<br>42<br>43<br>44<br>45<br>46<br>47<br>48<br>49                                                 | Limitations       | 19 | Discuss limitations of the study, taking into account sources of potential bias or imprecision. Discuss both direction and magnitude of any potential bias | 15    | Limitations include the cross-sectional nature of the data, which mean that we are unable to infer temporality and causality. We only used a single item to assess lacking                                                                                                                                                                                                                                                                                                                                                                                    |

1  
2  
3  
4  
5  
6  
7  
8  
9  
10  
11  
12  
13  
14  
15  
16  
17  
18  
19  
20  
21  
22  
23  
24  
25  
26  
27  
28  
29  
30  
31  
32  
33  
34  
35  
36  
37  
38  
39  
40  
41  
42  
43  
44  
45  
46  
47  
48  
49

For peer review only

interest in sex, although we additionally took account of whether those who reported this also reported that it caused them distress, as a way of trying to capture more problematic lack of interest. It is important to acknowledge, however, that these data do not necessarily correspond to clinical diagnoses. This sensitivity analysis enabled us to demonstrate that for most variables, similar associations exist regardless of whether or not distress was reported. Finally, we have tested many associations within this study and some will have been significant by chance.

|                          |    |                                                                                                                                                                            |       |                                                                                                                                                                                                      |
|--------------------------|----|----------------------------------------------------------------------------------------------------------------------------------------------------------------------------|-------|------------------------------------------------------------------------------------------------------------------------------------------------------------------------------------------------------|
| Interpretation           | 20 | Give a cautious overall interpretation of results considering objectives, limitations, multiplicity of analyses, results from similar studies, and other relevant evidence | 16-17 | The findings indicate that reporting lack of interest in sex is associated with a broad range of predictors across sociodemographic, relationship, sexual behaviour, and sexual attitudinal domains. |
| Generalisability         | 21 | Discuss the generalisability (external validity) of the study results                                                                                                      | 15    | Strengths of our study include the use of national probability sample survey data involving both men and women across a wide age range (21, 22).                                                     |
| <b>Other information</b> |    |                                                                                                                                                                            |       |                                                                                                                                                                                                      |
| Funding                  | 22 | Give the source of funding and the role of the funders for the present study and, if applicable, for the                                                                   | 18    | Natsal-3 was supported by grants                                                                                                                                                                     |



1  
2  
3  
4 original study on which the present article is based  
5  
6  
7  
8  
9  
10  
11  
12  
13

---

from the U.K. Medical Research  
Council (G0701757) and the  
Wellcome Trust (084840), with  
support from the Economic and  
Social Research Council and the  
Department of Health.

---

14  
15 \*Give information separately for cases and controls in case-control studies and, if applicable, for exposed and unexposed groups in cohort and cross-sectional studies.  
16

17 **Note:** An Explanation and Elaboration article discusses each checklist item and gives methodological background and published examples of transparent reporting. The STROBE  
18 checklist is best used in conjunction with this article (freely available on the Web sites of PLoS Medicine at <http://www.plosmedicine.org/>, Annals of Internal Medicine at  
19 <http://www.annals.org/>, and Epidemiology at <http://www.epidem.com/>). Information on the STROBE Initiative is available at [www.strobe-statement.org](http://www.strobe-statement.org).  
20  
21  
22  
23  
24  
25  
26  
27  
28  
29  
30  
31  
32  
33  
34  
35  
36  
37  
38  
39  
40  
41  
42  
43  
44  
45  
46  
47  
48  
49

# BMJ Open

## What factors are associated with reporting lacking interest in sex and how do these vary by gender?: Findings from the third British National Survey of Sexual Attitudes and Lifestyles

|                                 |                                                                                                                                                                                                                                                                                                                                                                                                                                                                                                                                                                                                                |
|---------------------------------|----------------------------------------------------------------------------------------------------------------------------------------------------------------------------------------------------------------------------------------------------------------------------------------------------------------------------------------------------------------------------------------------------------------------------------------------------------------------------------------------------------------------------------------------------------------------------------------------------------------|
| Journal:                        | <i>BMJ Open</i>                                                                                                                                                                                                                                                                                                                                                                                                                                                                                                                                                                                                |
| Manuscript ID                   | bmjopen-2017-016942.R2                                                                                                                                                                                                                                                                                                                                                                                                                                                                                                                                                                                         |
| Article Type:                   | Research                                                                                                                                                                                                                                                                                                                                                                                                                                                                                                                                                                                                       |
| Date Submitted by the Author:   | 19-Jul-2017                                                                                                                                                                                                                                                                                                                                                                                                                                                                                                                                                                                                    |
| Complete List of Authors:       | Graham, Cynthia; University of Southampton, Psychology<br>Mercer, Catherine; University College London, Research Department of Infection and Population Health<br>Tanton, Clare; University College London, Research Department of Infection & Population Health<br>Jones, Kyle; University College London, Research Department of Infection and Population Health<br>Johnson, Anne; University College London, Research Department of Infection and Population Health<br>Wellings, Kaye; London School of Hygiene and Tropical Medicine,<br>Mitchell, Kirstin; London School of Hygiene and Tropical Medicine |
| <b>Primary Subject Heading</b>: | Sexual health                                                                                                                                                                                                                                                                                                                                                                                                                                                                                                                                                                                                  |
| Secondary Subject Heading:      | Epidemiology                                                                                                                                                                                                                                                                                                                                                                                                                                                                                                                                                                                                   |
| Keywords:                       | SEXUAL MEDICINE, EPIDEMIOLOGY, Sexual and gender disorders < PSYCHIATRY                                                                                                                                                                                                                                                                                                                                                                                                                                                                                                                                        |
|                                 |                                                                                                                                                                                                                                                                                                                                                                                                                                                                                                                                                                                                                |

SCHOLARONE™  
Manuscripts

1  
2  
3 **What factors are associated with reporting lacking interest in sex and how do these**  
4 **vary by gender?: Findings from the third British National Survey of Sexual Attitudes**  
5 **and Lifestyles**  
6

7  
8 Graham, C. A.,<sup>1</sup> Mercer, C. H.,<sup>2</sup> Tanton, C.,<sup>2</sup> Jones, K. G.,<sup>2</sup> Johnson, A. M.,<sup>2</sup> Wellings, K.,<sup>3</sup>  
9 Mitchell, K. R.<sup>4</sup>  
10

11  
12 <sup>1</sup>Centre for Sexual Health Research, Department of Psychology, University of  
13 Southampton, Southampton, U.K.

14 <sup>2</sup>Centre for Sexual Health and HIV Research, Research Department of Infection &  
15 Population Health, University College London, London, U.K.

16 <sup>3</sup>Centre for Sexual and Reproductive Health Research, Department of Social and  
17 Environmental Health Research, London School of Hygiene and Tropical Medicine,  
18 London, U.K.

19 <sup>4</sup>MRC/CSO Social and Public Health Sciences Unit, University of Glasgow, 200 Renfield  
20 Street, Glasgow G2 3QB, U.K.  
21

22  
23  
24 Corresponding author:

25 Cynthia A. Graham

26 Department of Psychology

27 Faculty of Social, Human, and Mathematical Sciences

28 Shackleton Building (B44)

29 University of Southampton

30 Highfield, Southampton

31 SO17 1BJ UK

32 tel: 023 8059 3091

33 e-mail: C.A.Graham@soton.ac.uk  
34  
35  
36  
37

38 Word count: 3,900  
39  
40  
41  
42  
43  
44  
45  
46  
47  
48  
49  
50  
51  
52  
53  
54  
55  
56  
57  
58  
59  
60

## ABSTRACT

**Objectives:** To investigate factors associated with reporting lacking interest in sex, and how these vary by gender.

**Setting:** British general population.

**Design:** Complex survey analyses of data collected for a cross-sectional probability sample survey, undertaken 2010-12, specifically logistic regression to calculate age-adjusted odds ratios (AOR) to identify associated factors.

**Participants:** 4,839 men and 6,669 women aged 16-74 years who reported  $\geq 1$  sexual partner (opposite-sex or same-sex) in the past year for the third National Survey of Sexual Attitudes and Lifestyles [Natsal-3].

**Main outcome measure:** Lacking interest in sex for  $\geq 3$  months in the past year.

**Results:** Overall, 15.0% (13.9-16.2) of men and 34.2% (32.8-35.5) of women reported lacking interest in sex. This was associated with age and physical and mental health for both men and women, including self-reported general health and current depression. Lacking interest in sex was more prevalent among men and women reporting STI diagnoses (ever), non-volitional sex (ever), and holding sexual attitudes related to normative expectations about sex. Some gender similarities in associated relationship and family-related factors were evident, including partner having had sexual difficulties in the last year (M: AOR:1.41 [1.07-1.86]; W: AOR:1.60 [1.32-1.94]), not feeling emotionally close to partner during sex (M: 3.74 [1.76-7.93]; W: 4.80 [2.99-7.69]), and ease of talking about sex (M: 1.53 [1.23-1.90] W: 2.06 [1.77-2.39]). Among women only, lack of interest in sex was higher among those in a relationship of  $>1$  year in duration and those not sharing the same level of interest (4.57 [3.87-5.38]) or preferences (2.91 [2.22-3.83]) with a partner.

**Conclusions:** Both gender similarities and differences were found in factors associated with lacking interest in sex, with the most marked differences in relation to some relationship variables. Findings highlight the need to assess, and if appropriate, treat lacking interest in sex in a holistic and relationship-specific way.

## ARTICLE SUMMARY

**Strengths and limitations of this study**

- This study used nationally representative data to investigate factors associated with reporting lacking interest in sex, and how these vary by gender, in the British population.
- Few previous population-based studies have obtained data on low sexual interest from men and women and made direct comparisons between them.
- The study included detailed assessment of a range of relationship context and attitudinal variables seldom included in previous population-based surveys.
- Information about lacking interest in sex was assessed with a single item, asking participants whether they had lacked interest in having sex for a period of three months or more in the past year. Those who reported this were also asked whether they experienced associated distress.
- The cross-sectional data do not allow us to establish the causal direction of associations between lacking interest in sex and variables of interest.

1  
2  
3 In Britain's third National Survey of Sexual Attitudes and Lifestyles (Natsal-3)  
4  
5 lacking interest in sex was the most common sexual difficulty reported by both men  
6  
7 and women (1). Lacking interest in sex for 3 months or more in the past year was  
8  
9 twice as common in women compared to men. When duration and symptom severity  
10  
11 criteria are considered (i.e., that symptoms last six months or more and occur "very  
12  
13 often" or "always") these prevalence estimates are much lower (2), but the gender  
14  
15 difference is maintained.  
16  
17

18  
19 Researchers have paid more attention to problems of low sexual interest in  
20  
21 women than in men (3-5). Among men the predominant focus has been on erectile  
22  
23 functioning and on physiological causes of lacking interest in sex such as hormonal  
24  
25 status, rather than on psychosocial determinants. This lack of attention to male  
26  
27 problems is reflected in recent revisions to the Diagnostic and Statistical Manual  
28  
29 (DSM-5) classification of sexual disorders (6) which involved major changes to sexual  
30  
31 arousal and desire disorder categories in women, but no substantive changes for male  
32  
33 disorders.  
34  
35  
36  
37

38  
39 Most but not all studies involving men have reported an association between  
40  
41 low sexual interest and increasing age (for review, see 7). However, there are  
42  
43 conflicting findings on the association with physical and mental health (8,9). Limited  
44  
45 research suggests that psychosocial and relationship factors may also be associated  
46  
47 with low sexual desire in men (8, 10-12).  
48  
49

50  
51 Among women, factors that have been consistently associated with lacking  
52  
53 interest in sex are relationship problems, relationship quality, and partner's sexual  
54  
55 functioning (13-17), poor physical health (18), and negative mood states/depression  
56  
57 (13, 18,19). There are inconsistent findings on the association between low sexual  
58  
59  
60

1  
2  
3 interest and both age and menopausal status (14,18). Few large-scale surveys have  
4  
5 examined possible links between lacking interest in sex and either sexual attitudes or  
6  
7 sexual behaviour. In the second wave of the British National Survey of Sexual Attitudes  
8  
9 and Lifestyles (Natsal-2), among women, lacking interest in sex was associated with  
10  
11 lower frequency of sex and attitudes according sex low priority (20).  
12  
13

14  
15 Studies have, for the most part, used small, clinical samples of patients seeking  
16  
17 treatment for low sexual desire problems. The potential for bias in such studies is  
18  
19 revealed in previously reported findings from Natsal-3 that only around a third of men  
20  
21 and women with one or more sexual function problems meeting DSM 5 morbidity  
22  
23 criteria had sought professional help in the last year. (2). The few large-scale  
24  
25 probability-based surveys involving both men and women have focused on  
26  
27 associations between low sexual desire and sociodemographic factors.  
28  
29

30  
31 In summary, the evidence on the factors associated with men's and women's  
32  
33 reports of low sexual desire is drawn largely from non-representative samples, is  
34  
35 somewhat equivocal and, in men, sparse. Given that most previous research has  
36  
37 involved non-representative samples, it is important to explore how correlates might  
38  
39 differ in a population-based sample. Understanding the correlates of lacking interest  
40  
41 in sex is key to informing therapeutic options for this group.  
42  
43

44  
45 The research questions addressed in this paper are: (1) What  
46  
47 sociodemographic, relationship, sexual behaviour, and sexual attitudinal factors are  
48  
49 associated with lacking interest in sex in sexually active men and women?; (2) To what  
50  
51 extent do these factors vary by gender?; (3) To what extent does lacking interest in sex  
52  
53 co-exist with other sexual function problems?  
54  
55

## 56 57 **METHOD** 58 59 60

## Participants and Procedure

Natsal-3 is a probability sample survey of 15,162 men and women aged 16-74 years in Britain, interviewed between September 2010 and August 2012. A multi-stage, clustered, and stratified probability sample design was used and participants were interviewed in their homes by professional interviewers using a combination of computer-assisted personal interviews (CAPI), and computer-assisted self-interviews (CASI) for the more sensitive questions (including, of relevance to this paper, those on sexual function). Interviewers were present in the room while participants completed the CASI, but did not view responses (20). After weighting to adjust for unequal probabilities of selection and to match the British population in terms of age, gender and geographical region, the Natsal-3 sample was broadly representative, on key variables, of the British population as described by the 2011 Census (21).

The estimated response rate was 57.7%, and the estimated cooperation rate (the number of interviews completed from eligible addresses for which contact was made) was 65.8% (of all eligible addresses contacted) (22). More extensive details of the survey methodology and sample characteristics are published elsewhere (21,22) and for demographic characteristics of the sample, see (22). Participants provided oral informed consent for interviews and the survey was approved by the NRES Committee South-Central – Oxford A (Ref.: 10/H0604/27).

Only respondents who reported  $\geq 1$  sexual partner (opposite-sex or same-sex) in the past year (4,839 men and 6,669 women) were asked whether they had lacked interest in sex for a period of three months or longer in the past year (see below). These participants were the focus of the current analyses.

## Outcome Measures



1  
2  
3 Items were drawn from the Natsal-SF, a measure of sexual function, designed  
4 and validated for population surveys. The measure comprises items on problems with  
5 sexual response, relational aspects of sexual function, and self-appraisal of sex life  
6  
7  
8  
9  
10 (23,24). Participants who reported at least one sexual partner in the past year (hereon  
11  
12 'sexually active participants') were asked: *'In the last year, have you experienced any*  
13  
14 *of the following for a period of 3 months or longer?'* and were given a list of difficulties  
15  
16 and asked to indicate which they had experienced. The list included *'Lacked interest in*  
17  
18 *having sex'*. Those indicating this difficulty were defined as lacking interest in having  
19  
20 sex for a period of three months or more in the past year (the outcome for this  
21  
22 analysis). Individuals reporting lacking interest in sex for at least 3 months were then  
23  
24 asked *'And how do you feel about this?'* with response options: *not at all distressed, a*  
25  
26 *little distressed, fairly distressed; very distressed*. Those answering a little, fairly or very  
27  
28 distressed were defined as lacking interest in sex and having distress about this  
29  
30 symptom (outcome for sensitivity analysis, see below).  
31  
32  
33  
34  
35

### 36 **Statistical Analysis**

37  
38 All analyses were done using the complex survey functions of STATA (version  
39  
40 14; StataCorp LP, College Station, Texas) to account for the weighting, clustering, and  
41  
42 stratification of the data. We used multivariable logistic regression to calculate age-  
43  
44 adjusted odds ratios (AOR) to examine the associations between reports of lacking  
45  
46 interest in sex lasting three months or longer in the past year, and sociodemographic,  
47  
48 health, relationship, sexual behaviour, and sexual attitude variables. For each variable,  
49  
50 we also tested the interaction with gender, to see if the magnitude of the associations  
51  
52 between the above factors and reports of lacking interest in sex was the same for men  
53  
54 and women. We conducted a sensitivity analysis for the outcome variable reporting  
55  
56  
57  
58  
59  
60

1  
2  
3 lack of interest in sex lasting three months or longer *and* distress about this symptom  
4  
5 to assess whether similar associations were found. We also examined the association  
6  
7 between reporting lacking interest in sex and the other sexual function problems  
8  
9 asked about in Natsal-3, using AORs.  
10

## 11 RESULTS

12  
13 Overall, 15.0 (95% CI 13.9-16.2) of sexually active men and 34.2% (95% CI 32.8-  
14  
15 35.5) of sexually active women reported lacking interest in sex for three months or  
16  
17 longer in the year prior to interview. Table 1 presents the associations between  
18  
19 lacking interest in sex and sociodemographic, health, relationship, sexual behaviour,  
20  
21 and sexual attitudinal variables for men and women.  
22  
23  
24  
25

26  
27 Age was significantly associated with lacking interest in sex. Prevalence  
28  
29 increased with age, being lowest among younger participants (16-24 years; M: 11.5%;  
30  
31 W: 24.8%) and peaking in men aged 35-44 years (17.2%) and in women aged 55-64  
32  
33 years (38.8%). Regarding demographic variables, after adjusting for age, lack of  
34  
35 interest was associated with leaving school at 16 (men only; AORS: 1.31), being  
36  
37 unemployed (men only AORS: M: 1.44), and less frequent religious practice (women  
38  
39 only; AOR: 0.79). In women, after adjusting for age, those who were students or  
40  
41 retired were less likely to lack desire.  
42  
43  
44

45  
46 After adjusting for age, there were associations between all physical and  
47  
48 mental health variables assessed and lacking interest in sex. Individuals in poorer  
49  
50 health (AORs: M: 3.29; W: 1.93), those who had much difficulty walking upstairs  
51  
52 (AORs: M: 2.68; W: 1.55), those with a longstanding medical condition (AORs: M 1.76;  
53  
54 W: 1.35), and those who had screened positive for current depression (AORs: M: 2.95;  
55  
56 W: 2.79) or who had been treated for depression in the past year (AORs: M: 2.82; W:  
57  
58  
59  
60

1  
2  
3 2.32) were more likely to report lacking interest in sex. The magnitude of these  
4  
5 associations was similar for men and women. A greater number of comorbid health  
6  
7 conditions was significantly associated with lacking interest in sex among both men  
8  
9 and women. Menopausal status in women and circumcision in men were not  
10  
11 associated with the likelihood of lacking sexual interest.  
12  
13

14  
15       Regarding sexual behaviour, among both men and women, lack of interest was  
16  
17 associated with frequency of sexual activity (defined as vaginal, oral or anal  
18  
19 intercourse) in the four weeks prior to interview; 12.4% of men, and 33.8% of women  
20  
21 who reported having engaged in 3-4 sexual acts reported lack of interest, vs. 20.7% of  
22  
23 men and 42.9% of women who reported no sexual activity. Associations with recent  
24  
25 masturbation differed by gender; lack of interest in sex was slightly *more* common  
26  
27 among men who reported having recently masturbated but *less* common among  
28  
29 women who did so. Women with three or more partners in the past year were less  
30  
31 likely to report low sexual interest than those with only one partner (AOR: 0.70) but  
32  
33 there was no association between partner numbers and lacking interest in sex in men.  
34  
35 Among men only, those who reported ever having taken drugs to assist sexual  
36  
37 performance were more likely to report lacking interest in sex (AOR: 1.36). A similar  
38  
39 magnitude association was seen for women (AOR: 1.39) however, fewer women  
40  
41 reported ever having taken drugs and the 95%CI therefore crosses 1.  
42  
43  
44  
45  
46  
47

48       Associations were found between lacking interest in sex and several  
49  
50 relationship contextual variables and for many of these variables associations were  
51  
52 stronger for women than for men. For both men and women, lack of interest was  
53  
54 associated with relationship status; women living with a partner were more likely to  
55  
56 lack interest in sex than those in other relationship categories (see Table 1). For  
57  
58  
59  
60

1  
2  
3 women, all relationship categories had lower AORs than living with partner. Duration  
4  
5 of most recent sexual relationship was significantly associated with lacking interest in  
6  
7 sex only among women, being more common among those in longer relationships.  
8  
9

10 Among both men and women, there was an association between ease of  
11  
12 communication and lacking interest in sex. Those who found it “always easy to talk  
13  
14 about sex” with their partner were less likely to report low interest. Lack of interest  
15  
16 was more likely among those whose partner had sexual difficulties in the last year, and  
17  
18 those who reported a lower assessment of happiness with the relationship, and not  
19  
20 feeling emotionally close to partner during sex. Among women but not men, not  
21  
22 sharing the same level of sexual interest with a partner, and not sharing the same  
23  
24 sexual likes and dislikes, were also associated.  
25  
26  
27

28  
29 Having been pregnant in the last year was associated with lacking sexual  
30  
31 interest as was having one or more young child(ren) (women only). Lack of interest in  
32  
33 sex was significantly associated with sexual health indicators, including previous STI  
34  
35 diagnosis and ever having experienced non-volitional sex. The strength and direction  
36  
37 of associations was similar for men and women, except for reporting another sexual  
38  
39 function problem, which was significant for two or more problems in men, but one or  
40  
41 more problems in women. Sexual competence at first sex was significantly associated  
42  
43 with lack of interest in sex only among women.  
44  
45  
46

47 Regarding attitudinal variables, both men and women who endorsed  
48  
49 statements that “people are under pressure to have sex” and “people want less sex as  
50  
51 they age” were more likely to report lacking interest in sex over the past year. The  
52  
53 only attitudinal variable that showed a significant interaction with gender was that  
54  
55 which related to men having a “naturally higher sex drive than women.” Men who  
56  
57  
58  
59  
60

1  
2  
3 agreed with this statement were *less* likely than those who disagreed to lack interest  
4  
5 in sex, while the reverse was true among women.  
6

7  
8 Table 2 presents the associations between lacking interest in sex and being  
9  
10 distressed about this (as a measure/marker of severity), and the above  
11  
12 sociodemographic, health, and sexual relationship/behaviour variables. While  
13  
14 prevalence was lower, the associations and the interactions with gender were  
15  
16 generally similar; however, some of the previous gender-specific associations with  
17  
18 variables (e.g., masturbation, and pregnancy in women, and education in men) were  
19  
20 no longer significant when the outcome variable was reported low sexual interest *and*  
21  
22 associated distress. In addition, some associations became stronger when considering  
23  
24 only those who reported a distressing lack of interest in sex (vs. lack of interest  
25  
26 without any reported distress). For example, the association between depressive  
27  
28 symptoms and having been treated for depression in the past year, was stronger in  
29  
30 men than in women.  
31  
32  
33  
34  
35

36 Regarding the association between reporting lacking interest in sex and the  
37  
38 other sexual function problems asked about in Natsal-3, the strongest (positive)  
39  
40 associations were for lacking enjoyment in sex (AORs=9.78 and 8.95 for men and  
41  
42 women, respectively), followed by feeling no excitement or arousal during sex  
43  
44 (AORs=9.21 and 9.16 for men and women, respectively) (see Table 3).  
45  
46  
47

## 48 DISCUSSION

49  
50 We identified a broad range of factors, including some that have not been  
51  
52 explored in previous large-scale surveys, that were associated with men's and  
53  
54 women's reports of lacking interest in sex in a representative British population-based  
55  
56 survey. Our findings, discussed below, revealed some gender similarities as well as  
57  
58  
59  
60

1  
2  
3 some interesting gender differences. The strongest evidence for gender differences  
4  
5 was for the relationship context variables, where associations with lacking interest in  
6  
7 sex were much stronger for women than for men.  
8  
9

### 10 **Interpretation of findings in context of previous research**

11  
12 Our finding relating to differences by age is consistent with some, but not all,  
13  
14 results from previous research which has yielded generally inconsistent findings. Some  
15  
16 studies have, like ours, shown a higher prevalence of sexual interest problems in older  
17  
18 than in younger women (25-27). Others have found no association between age and  
19  
20 low sexual interest complaints (14, 28) and yet more have shown lack of sexual  
21  
22 interest to be more common among younger women (18). Whereas we found a  
23  
24 marginal relationship with age in men, some studies (though not all e.g., 29) have  
25  
26 found a stronger relationship (12, 30). It is possible that the varied findings might in  
27  
28 part be a result of varied definitions of low sexual interest or differences in sampling.  
29  
30  
31  
32

33  
34 The finding in this analysis that having young children appears to increase the  
35  
36 likelihood of reporting lack of sexual interest for women, but not for men, remains  
37  
38 unchanged since the previous Natsal-2 survey (31). This may be due to fatigue  
39  
40 associated with a primary caring role (32), the fact that daily stress appears to affect  
41  
42 sexual functioning in women more than men (33), or possibly a shift in focus of  
43  
44 attention attendant on bringing up small children.  
45  
46  
47

48  
49 The finding of a link between lacking interest in sex and lacking enjoyment in  
50  
51 sex and/or feeling no excitement or arousal during sex is not surprising and has been  
52  
53 shown in previous studies (3). The strong associations between lack of interest in sex  
54  
55 and physical and mental health indicators, which we observed for both men and  
56  
57 women, is not entirely consistent with findings from other studies. While this link has  
58  
59  
60

1  
2  
3 been persuasively shown for women (13, 18, 19), in men, the evidence is more  
4  
5 equivocal. In a study of men attending an outpatient clinic for sexual problems,  
6  
7 psychological symptoms such as anxiety and depression were more predictive of low  
8  
9 sexual desire than hormonal or other physical markers (11). In contrast, DeRogatis et  
10  
11 al. (9), in their study of men with erectile dysfunction, observed no differences in  
12  
13 depressive symptoms, concurrent illness, or medication use between men with and  
14  
15 without symptoms of low sexual desire.  
16  
17

18  
19 The gender differences in associations between masturbation and a lack of  
20  
21 sexual interest are interesting and have been explored in few previous population-  
22  
23 based studies. Our observation that lack of interest was *more* commonly reported by  
24  
25 men who had recently masturbated, but *less* commonly reported by women who had  
26  
27 done so may reflect a tendency among women for self-pleasuring to be, not a  
28  
29 substitute for partnered sex but instead a part of a broader repertoire of sexual  
30  
31 fulfilment; this possibility is worthy of further exploration. In contrast, for men  
32  
33 frequency of masturbation reflects reduced frequency of partnered sex (34). However,  
34  
35 it is worth noting that in the U.S. National Health and Social Life Survey, lifetime  
36  
37 number of sexual partners and masturbation practices were unrelated to the  
38  
39 likelihood of sexual desire difficulties for either men or women (35).  
40  
41  
42  
43  
44

45  
46 Our observation that duration of most recent sexual relationship showed a  
47  
48 strong association with lacking interest in sex in women is consistent with previous  
49  
50 studies (15, 17). There has been little comparable research on men with which to  
51  
52 corroborate the absence of such an association among men in our analysis.  
53  
54

55  
56 Our data confirm the importance of the relational context in individuals' level  
57  
58 of sexual interest. The strong associations between relationship and partner factors  
59  
60

1  
2  
3 and sexual interest are consistent with those shown in many previous studies relating  
4  
5 to women (13-17) and with a much smaller literature in men (36,37). In particular,  
6  
7 sexual dysfunction in a male partner has previously been associated with women's  
8  
9 levels of sexual desire (15, 38, 39), and sexual desire discrepancy in couples has been  
10  
11 linked to lower reported relationship satisfaction and more couple conflict (40).  
12  
13

14  
15 The strong links found between several key sexual health outcomes and lack of  
16  
17 interest in sex are interesting; among both men and women, reporting an STI  
18  
19 diagnosis and non-volitional sex were associated with reporting lack of interest in sex.  
20  
21 Our finding that lacking "sexual competence" at first sexual intercourse was linked  
22  
23 with subsequent lack of interest in sex among women but not men, may reflect a  
24  
25 greater salience of contextual aspects of first sex for women. More women than men  
26  
27 report being pressured by a partner on the first occasion of heterosexual intercourse,  
28  
29 and to have subsequently experienced regret about first sexual experiences (41).  
30  
31 These findings suggest that for women, early sexual experiences may shape future  
32  
33 sexual encounters/relationships to a greater extent than for men.  
34  
35  
36  
37

38  
39 To our knowledge no previous studies have assessed the association between  
40  
41 attitudes toward sexual matters and lack of interest in sex. Endorsing the assumption  
42  
43 that "people want less sex as they age" was associated with lack of interest in both  
44  
45 genders. It might be that this belief contributes to a decline in interest, or – equally  
46  
47 plausible – that those who lack interest adopt this attitude to avoid viewing their  
48  
49 experience as problematic. Interestingly, men who endorsed the view that "men have  
50  
51 a higher sex drive than women" were significantly *less* likely to report lacking interest  
52  
53 in sex, whereas women who agreed with this statement were *more* likely to do so. If  
54  
55 people responded to this statement with reference to their own relationship, these  
56  
57  
58  
59  
60



1  
2  
3 findings may be seen as making intuitive sense. The results suggest that endorsing  
4  
5 stereotypical gender-norms related to sex may adversely affect women more than  
6  
7 men.  
8  
9

### 10 **Strengths and Limitations**

11  
12 Strengths of our study include the use of national probability sample survey  
13  
14 data involving both men and women across a wide age range (21, 22). With a few  
15  
16 exceptions (e.g., 12, 14, 29, 42), most surveys on sexual desire problems have sampled  
17  
18 either men *or* women, precluding direct comparisons within the same sample.  
19  
20

21  
22 Another strength was the detailed and holistic examination of relationship context  
23  
24 and attitudinal variables, which few previous studies have reported. Response rates  
25  
26 for Natsal-3 were also similar to those of other major social surveys in Britain (43) and  
27  
28 higher than many previous surveys of sexual problems (35, 44).  
29  
30

31  
32 Limitations include the cross-sectional nature of the data, which mean that we  
33  
34 are unable to infer temporality and causality. The sample is representative of those  
35  
36 resident in private households in Britain i.e., not those living in institutions. We  
37  
38 included only respondents who reported  $\geq 1$  sexual partner (opposite-sex or same-  
39  
40 sex) in the past year, excluding those who had not had sex because of lack of interest.  
41  
42 We only used a single item to assess lacking interest in sex, although we additionally  
43  
44 took account of whether those who reported this also reported that it caused them  
45  
46 distress, as a way of trying to capture more problematic lack of interest. This  
47  
48 sensitivity analysis enabled us to demonstrate that for most variables, similar  
49  
50 associations exist regardless of whether or not distress was reported. It is important to  
51  
52 acknowledge, however, that these data do not necessarily correspond to clinical  
53  
54 diagnoses. Finally, we have tested many associations within this study and some will  
55  
56  
57  
58  
59  
60

1  
2  
3 have been significant by chance. These were exploratory and descriptive analyses of  
4  
5 zero-order relationships and therefore some of the smaller effect sizes may not  
6  
7 replicate and may not hold in multivariable analyses.  
8  
9

### 10 **Implications for Research and Practice**

11  
12 The findings indicate that lack of interest in sex is associated with a broad  
13  
14 range of factors across sociodemographic, relationship, sexual behaviour, and sexual  
15  
16 attitudinal domains. There are both research and clinical applications of our results.  
17  
18

19  
20 Firstly, our findings underscore the importance of the relational context in  
21  
22 understanding low sexual interest in both men and women. For women in particular,  
23  
24 the experience of sexual interest appears strongly linked with their perceptions of the  
25  
26 quality of their relationships, their communication with partners, and their  
27  
28 expectations/attitudes about sex. Our findings support the view that transient (and  
29  
30 often adaptive) reductions in sexual desire are not evidence of “dysfunction” (45).  
31  
32 In the context of the recent FDA approval of flibanserin, the first drug to treat low  
33  
34 sexual desire in women (46), these findings are relevant to the current debate about  
35  
36 whether striving for a pharmaceutical solution to women’s sexual desire problems is  
37  
38 an appropriate and feasible goal (45, 47). Some authors have suggested that women  
39  
40 with complaints of low sexual interest might benefit most from integrative approaches  
41  
42 that accord with a biopsychosocial model (48).  
43  
44  
45  
46  
47

48  
49 Secondly, our findings on the strong association between open sexual  
50  
51 communication (i.e., “finding it always easy to talk about sex”) and a reduced  
52  
53 likelihood of reporting lack of interest in sex, particularly for women, emphasise the  
54  
55 importance of providing a broad sexual and relationships education, rather than  
56  
57 limiting attention only to adverse consequences of sex and how to prevent them.  
58  
59  
60

1  
2  
3 Similarly, the important role of early sexual experiences, and sexual “competence,”  
4  
5 especially for women, in shaping later experiences of sexual desire supports the need  
6  
7 for comprehensive sex education.  
8  
9

10 In a clinical context, our findings emphasise the importance of health care  
11  
12 professionals assessing psychological and interpersonal variables in individuals  
13  
14 presenting with complaints of low sexual interest (49). In couple therapy, it is  
15  
16 important that therapists have an awareness of the differences between men and  
17  
18 women in the factors associated with low sexual interest. For example, among the  
19  
20 subgroup of participants reporting both lack of interest in sex and related distress, we  
21  
22 found a stronger association between depressive symptoms and treatment for  
23  
24 depression in the last year among men compared with women. Lastly, our findings  
25  
26 support previous research on the critical role of physical and mental health in  
27  
28 understanding low sexual interest problems experienced by men and women (11, 18).  
29  
30  
31  
32

### 33 **Conclusions**

34  
35  
36 This study extends our understanding of the factors associated with lack of  
37  
38 interest in sex in men and women, the gender similarities and differences, and  
39  
40 highlights the need to assess and – if necessary – treat sexual desire problems in a  
41  
42 holistic and relationship- as well as gender-specific way.  
43  
44  
45  
46  
47  
48  
49  
50  
51  
52  
53  
54  
55  
56  
57  
58  
59  
60

### Contribution to authorship

The paper was conceived by CAG, CHM, AMJ, KW, and KRM. CAG wrote the first draft, with further contributions from all authors. Statistical analyses were undertaken by CHM, CT, and KGJ. CHM, AMJ (Principal Investigator) and KW, initial applicants on Natsal-3, wrote the study protocol and obtained funding. Natsal-3 questionnaire design, ethics applications, and piloting were undertaken by CHM, CT, AMJ, KW, and KRM. Data management was undertaken by NatCen Social Research, UCL and LSHTM. All authors contributed to data interpretation, reviewed successive drafts and approved the final version of the manuscript.

### Competing interests statement

AMJ has been a Governor of the Wellcome Trust since 2011. The remaining authors have nothing to disclose. Completed disclosure of interests form available to view online as supporting information.

### Funding Statement

Natsal-3 was supported by grants from the U.K. Medical Research Council (G0701757) and the Wellcome Trust (084840), with support from the Economic and Social Research Council and the Department of Health. Since September 2015, Kirstin Mitchell has been supported by the United Kingdom Medical Research Council grant MC\_UU\_12017/11, and Scottish Government Chief Scientist Office grant SPHSU11.

### Details of ethics approval

Natsal-3 was approved by the NRES Committee South Central-Oxford A (Ref: 10/H0604/27) on 12 July 2010. Participants provided oral informed consent for interviews.

### Data sharing statement

The Natsal-3 dataset is publicly available from the UK Data Service: <https://discover.ukdataservice.ac.uk/>; SN: 7799; persistent identifier: 10.5255/UKDA-SN-77991-1.

1  
2  
3  
4  
5  
6  
7  
8  
9  
10  
11  
12  
13  
14  
15  
16  
17  
18  
19  
20  
21  
22  
23  
24  
25  
26  
27  
28  
29  
30  
31  
32  
33  
34  
35  
36  
37  
38  
39  
40  
41  
42  
43  
44  
45  
46  
47  
48  
49  
50  
51  
52  
53  
54  
55  
56  
57  
58  
59  
60

For peer review only

## REFERENCES

1. Mitchell KR, Mercer CH, Ploubidis GB, et al. Sexual function in Britain: Findings from the third National Survey of Sexual Attitudes and Lifestyles (Natsal-3). *Lancet* 2013;382:1817-1829.
2. Mitchell KR, Jones KG, Wellings K, et al. Estimating the prevalence of sexual function problems: The impact of morbidity criteria. *J Sex Res* 2016;53:55-967.
3. Brotto LA. The DSM diagnostic criteria for hypoactive sexual desire disorder in women. *Arch Sex Behav* 2010a; 39:221-239.
4. Carvalho J, Nobre P. Biopsychosocial determinants of men's sexual desire: testing an integrative model. *J Sex Med* 2011;8:754-763.
5. Štulhofer A, Carvalheira AA, Træen B. Is responsive sexual desire for partnered sex problematic among men? Insights from a two-country study. *Sex Relation Ther* 2013;28:246-258.
6. American Psychiatric Association. *Diagnostic and statistical manual of mental disorders*, 5th. ed. Arlington, VA: Author 2013.
7. Brotto LA. The DSM diagnostic criteria for hypoactive sexual desire disorder in men. *J Sex Med* 2010b;7:2015-2030.
8. Corona G, Lee DM, Forti G, et al. Age-related changes in general and sexual health in middle-aged and older men: Results from the European Male Ageing Study (EMAS). *J Sex Med* 2010;7:1362-1380.
9. DeRogatis L, Rosen RC, Goldstein I, et al. Characterization of hypoactive sexual desire disorder (HSDD) in men. *J Sex Med* 2012;9:812-820.
10. Carvalheira A, Træen B, Štulhofer A. Correlates of men's sexual interest: a cross-cultural study. *J Sex Med* 2014;11:154-164.

- 1  
2  
3 11. Corona G, Petrone L, Mannucci E, et al. The impotent couple: low desire. *Int J*  
4  
5 *Androl* 2005;28:46-52.  
6
- 7  
8 12. DeLamater JD, Sill M. Sexual desire in later life. *J Sex Res* 2005;42:138-149.  
9
- 10 13. Dennerstein L, Koochaki P, Barton I, et al. Hypoactive sexual desire disorder in  
11  
12 menopausal women: a survey of Western European women. *J Sex Med*  
13  
14 2006;3:212-222.  
15
- 16  
17 14. Hayes RD, Dennerstein L, Bennett CM, et al. Risk factors for female sexual  
18  
19 dysfunction in the general population: Exploring factors associated with low  
20  
21 sexual function and sexual distress. *J Sex Med* 2008;5:1681-1693.  
22  
23
- 24 15. McCabe MP, Goldhammer DL. Demographic and psychological factors related to  
25  
26 sexual desire among heterosexual women in a relationship. *J Sex Res*  
27  
28 2012;49:78-87.  
29
- 30  
31 16. Öberg K, Sjögren Fugl-Meyer K. On Swedish women's distressing sexual  
32  
33 dysfunctions: some concomitant conditions and life satisfaction. *J Sex Med*  
34  
35 2005;2:169-180.  
36
- 37  
38 17. Witting K, Santtila P, Varjonen M, et al. Female sexual dysfunction, sexual distress,  
39  
40 and compatibility with partner. *J Sex Med* 2008;5:2587-2599.  
41
- 42  
43 18. Shifren JL, Monz BU, Russo PA, et al. Sexual problems and distress in United States  
44  
45 women. *Obstet Gynecol* 2008;112:970-978.  
46
- 47  
48 19. Johannes CB, Clayton AH, Odom DM, et al. Distressing sexual problems in United  
49  
50 States women revisited: prevalence after accounting for depression. *J Clin*  
51  
52 *Psychiatry* 2009;70:1698-1706.  
53  
54  
55  
56  
57  
58  
59  
60

- 1  
2  
3 20. Mitchell KR, Mercer CH, Wellings K, Johnson AM. Prevalence of low sexual desire  
4  
5 among women in Britain: Associated factors. *J Sex Med*. 2009; 1;6(9):2434-  
6  
7 2444.  
8  
9  
10 21. Erens B, Phelps A, Clifton S, et al. Methodology of the third British National Survey  
11  
12 of Sexual Attitudes and Lifestyles (Natsal-3). *Sex Transm Infect* 2014;90:84-89.  
13  
14 22. Mercer CH, Tanton C, Prah P, et al. Changes in sexual attitudes and lifestyles in  
15  
16 Britain through the life course and over time: findings from the National  
17  
18 Surveys of Sexual Attitudes and Lifestyles (Natsal). *Lancet* 2013;382:1781-1794.  
19  
20  
21 23. Jones KG, Mitchell KR, Ploubidis GB, et al. The Natsal-SF measure of sexual  
22  
23 function: Comparison of three scoring methods. *J Sex Res* 2015;52:640-646.  
24  
25  
26 24. Mitchell KR, Ploubidis GB, Datta J, et al. The Natsal-SF: a validated measure of  
27  
28 sexual function for use in community surveys. *Eur J Epidemiol* 2012;27:409-18.  
29  
30  
31 25. Abdo CHN, Oliveira WM, Moreira ED, et al. Prevalence of sexual dysfunctions and  
32  
33 correlated conditions in a sample of Brazilian women—results of the Brazilian  
34  
35 study on sexual behavior (BSSB). *Int J Impot Res* 2004;16:160-166.  
36  
37  
38 26. Hayes RD, Dennerstein L, Bennett CM, et al. Relationship between hypoactive  
39  
40 sexual desire disorder and aging. *Fertil Steril* 2007;87:107-112.  
41  
42  
43 27. Peixoto MM, Nobre P. Prevalence and sociodemographic predictors of sexual  
44  
45 problems in Portugal: A population-based study with women aged 18 to 79  
46  
47 years. *J Sex Marital Ther* 2015;41:169-180.  
48  
49  
50 28. Rosen RC, Shifren JL, Monz BU, et al. Correlates of sexually-related personal  
51  
52 distress in women with low sexual desire. *J Sex Med* 2009;6:1549-1560.  
53  
54  
55 29. Laumann EO, Glasser DB, Neves RCS, et al. A population-based survey of sexual  
56  
57 activity, sexual problems and associated help-seeking behavior patterns in  
58  
59  
60



- 1  
2  
3 mature adults in the United States of America. *Int J Impot Res* 2009;21:171-  
4  
5 178.  
6  
7  
8 30. Eplöv L, Giraldi A, Davidsen M, et al. Sexual desire in a nationally representative  
9  
10 Danish population. *J Sex Med* 2007;4:47-56.  
11  
12 31. Mercer CH, Fenton KA, Johnson AM, et al. Who reports sexual function problems?  
13  
14 Empirical evidence from Britain's 2000 National Survey of Sexual Attitudes and  
15  
16 Lifestyles. *Sex Transm Infect* 2005;81:394-399.  
17  
18  
19 32. Park A, Bryson C, Clery E, et al. *British social attitudes 30*. London: NatCen 2013.  
20  
21  
22 33. Bodenmann G, Ledermann T, Blattner D, et al. Associations among everyday  
23  
24 stress, critical life events, and sexual problems. *J of Nerv Ment Dis*  
25  
26 2006;194:494-501.  
27  
28  
29 34. Gerressu M, Mercer CH, Graham CA, et al. Prevalence of masturbation of  
30  
31 associated factors in a British national probability survey. *Arch Sex Behav*  
32  
33 2008;37:266-278.  
34  
35  
36 35. Laumann EO, Paik A, Rosen RC. Sexual dysfunctions in the United States:  
37  
38 Prevalence and predictors. *JAMA* 1999;281:537-544.  
39  
40  
41 36. Janssen E, McBride KR, Yarber W, et al. Factors that influence sexual arousal in  
42  
43 men: A focus group study. *Arch Sex Behav* 2008;37:252-265.  
44  
45  
46 37. Murray S, Milhausen RR, Graham CA, et al. A qualitative exploration of factors that  
47  
48 affect sexual desire among men aged 30 to 65 in long-term relationships. *J Sex*  
49  
50 *Res* 2016;doi 10.1080/00224499.2016.1168352  
51  
52  
53 38. Çayan S, Bozlu M, Canpolat B, et al. The assessment of sexual functions in women  
54  
55 with male partners complaining of erectile dysfunction: does treatment of  
56  
57  
58  
59  
60

- 1  
2  
3 male sexual dysfunction improve female partner's sexual functions? *J Sex*  
4  
5  
6 *Marital Ther* 2004;30:333-341.
- 7  
8 39. Fisher WA, Rosen RC, Eardley I, et al. Experience of female partners of men with  
9  
10 erectile dysfunction: The female experience of men's attitudes to life events  
11  
12 and sexuality (FEMALES) study. *J Sex Med* 2005;2:675-668.
- 13  
14 40. Willoughby BJ, Farero AM, Busby DM. Exploring the effects of sexual desire  
15  
16 discrepancy among married couples. *Arch Sex Behav* 2014;43:551-562.
- 17  
18 41. Hawes ZC, Wellings K, Stephenson J. First heterosexual intercourse in the United  
19  
20 Kingdom: A review of the literature. *J Sex Res* 2010;47:137-152.
- 21  
22 42. Laumann EO, Nicolosi A, Glasser DB, et al. Sexual problems among women and  
23  
24 men aged 40–80 years: Prevalence and correlates identified in the Global Study  
25  
26 of Sexual Attitudes and Behaviors. *Int J Impot Res* 2005;17:39-57.
- 27  
28 43. Park A, Clery E, Curtice J, et al. *British social attitudes: The 28th report*. London,  
29  
30 England: NatCen 2012.
- 31  
32 44. Christensen BS, Grønbaek M, Osler M, et al. Sexual dysfunctions and difficulties in  
33  
34 Denmark: Prevalence and associated sociodemographic factors. *Arch Sex*  
35  
36 *Behav* 2011;40:121-132.
- 37  
38 45. Graham CA, Boynton PM, Gould K. Women's sexual desire: Challenging narratives  
39  
40 of dysfunction. *Eur Psychol*, in press.
- 41  
42 46. Woloshin S, Schwartz LM. US Food and Drug Administration approval of  
43  
44 flibanserin: Even the Score does not add up. *JAMA Intern Med* 2016; doi:  
45  
46 10.1001/jamainternmed.2016.0073
- 47  
48 47. Hart G, Wellings K. Sexual behaviour and its medicalisation: In sickness and in  
49  
50 health. *BMJ* 2002;324:896-900.
- 51  
52  
53  
54  
55  
56  
57  
58  
59  
60

- 1  
2  
3 48. Frühauf S, Gerger H, Schmidt HM, et al. Efficacy of psychological interventions for  
4  
5 sexual dysfunction: a systematic review and meta-analysis. *Arch Sex Behav*  
6  
7 2013;42:915-933.  
8  
9  
10 49. Brotto LA, Atallah CS, Johnson-Agbakwu C, et al. Psychological and interpersonal  
11  
12 dimensions of sexual function and dysfunction. *J Sex Med* 2016;13:538-571.  
13  
14  
15 50. Payne RA, Abel GA. UK indices of multiple deprivation-a way to make comparisons  
16  
17 across constituent countries easier. *Health Stat Q* 2012;53:22-37.  
18  
19  
20  
21  
22  
23  
24  
25  
26  
27  
28  
29  
30  
31  
32  
33  
34  
35  
36  
37  
38  
39  
40  
41  
42  
43  
44  
45  
46  
47  
48  
49  
50  
51  
52  
53  
54  
55  
56  
57  
58  
59  
60

Table 1: Factors associated with lacking interest in having sex for at least 3 months in the past year in sexually active men and women

|                                                              | Men                      |              |                    |                 |             |         | Women                    |              |                    |                 |             |         | <i>p-value for interaction with sex<sup>a</sup></i> |
|--------------------------------------------------------------|--------------------------|--------------|--------------------|-----------------|-------------|---------|--------------------------|--------------|--------------------|-----------------|-------------|---------|-----------------------------------------------------|
|                                                              | <i>Denom. (unwt, wt)</i> | %            | (95%CI)            | Age-adjusted OR | (95%CI)     | p-value | <i>Denom. (unwt, wt)</i> | %            | (95%CI)            | Age-adjusted OR | (95%CI)     | p-value |                                                     |
| <b>All</b>                                                   | <b>4839, 5973</b>        | <b>15.0%</b> | <b>(13.9-16.2)</b> |                 |             |         | <b>6669, 5755</b>        | <b>34.2%</b> | <b>(32.8-35.5)</b> |                 |             |         |                                                     |
| <b>Socio-demographics</b>                                    |                          |              |                    |                 |             |         |                          |              |                    |                 |             |         |                                                     |
| <b>Age group</b>                                             |                          |              |                    |                 |             | 0.0471  |                          |              |                    |                 |             | <0.0001 | 0.6733                                              |
| 16-24                                                        | 1279, 936                | 11.5%        | (9.4-14.0)         | 1               | -           |         | 1662, 923                | 24.8%        | (22.5-27.1)        | 1               | -           |         |                                                     |
| 25-34                                                        | 1376, 1238               | 14.6%        | (12.7-16.6)        | 1.32            | (1.00-1.73) |         | 2236, 1246               | 31.9%        | (29.8-34.1)        | 1.42            | (1.22-1.66) |         |                                                     |
| 35-44                                                        | 719, 1298                | 17.2%        | (14.5-20.4)        | 1.61            | (1.19-2.18) |         | 1050, 1290               | 36.8%        | (33.7-40.1)        | 1.77            | (1.48-2.13) |         |                                                     |
| 45-54                                                        | 630, 1186                | 15.3%        | (12.5-18.7)        | 1.40            | (1.01-1.95) |         | 871, 1186                | 37.9%        | (34.5-41.5)        | 1.86            | (1.53-2.25) |         |                                                     |
| 55-64                                                        | 512, 849                 | 16.5%        | (13.4-20.2)        | 1.53            | (1.10-2.13) |         | 569, 755                 | 38.8%        | (34.5-43.2)        | 1.92            | (1.55-2.39) |         |                                                     |
| 65-74                                                        | 323, 467                 | 13.9%        | (10.4-18.3)        | 1.22            | (0.81-1.82) |         | 281, 355                 | 34.2%        | (28.4-40.5)        | 1.58            | (1.18-2.12) |         |                                                     |
| <b>Index of Multiple Deprivation (quintiles)<sup>b</sup></b> |                          |              |                    |                 |             | 0.093   |                          |              |                    |                 |             | 0.0316  | 0.0111                                              |
| 1 (least deprived)                                           | 977, 1279                | 13.9%        | (11.6-16.6)        | 1               | -           |         | 1248, 1208               | 35.7%        | (32.6-38.9)        | 1               | -           |         |                                                     |
| 2                                                            | 962, 1264                | 13.0%        | (10.8-15.6)        | 0.93            | (0.69-1.25) |         | 1290, 1208               | 33.6%        | (30.6-36.7)        | 0.92            | (0.76-1.13) |         |                                                     |
| 3                                                            | 942, 1169                | 18.0%        | (15.2-21.2)        | 1.38            | (1.04-1.85) |         | 1299, 1116               | 30.1%        | (27.2-33.2)        | 0.81            | (0.66-0.99) |         |                                                     |
| 4                                                            | 967, 1184                | 15.3%        | (12.8-18.3)        | 1.15            | (0.86-1.55) |         | 1384, 1137               | 35.9%        | (33.0-39.0)        | 1.08            | (0.89-1.30) |         |                                                     |
| 5 (most deprived)                                            | 991, 1077                | 15.1%        | (12.7-17.8)        | 1.14            | (0.85-1.52) |         | 1448, 1086               | 35.3%        | (32.4-38.3)        | 1.06            | (0.87-1.28) |         |                                                     |
| <b>Education level<sup>c</sup></b>                           |                          |              |                    |                 |             | 0.0083  |                          |              |                    |                 |             | 0.2453  | 0.2914                                              |
| Left school aged 17+                                         | 2862, 3464               | 13.5%        | (12.1-15.1)        | 1               | -           |         | 4150, 3406               | 32.7%        | (31.0-34.5)        | 1               | -           |         |                                                     |
| Left school at 16                                            | 1873, 2437               | 17.2%        | (15.3-19.4)        | 1.31            | (1.07-1.60) |         | 2409, 2287               | 36.6%        | (34.4-38.9)        | 1.08            | (0.95-1.23) |         |                                                     |
| <b>Employment status</b>                                     |                          |              |                    |                 |             | 0.0086  |                          |              |                    |                 |             | 0.0003  | 0.0766                                              |
| Employed                                                     | 3211, 4254               | 14.7%        | (13.3-16.1)        | 1               | -           |         | 3871, 3517               | 34.6%        | (32.9-36.4)        | 1               | -           |         |                                                     |
| Full-time education                                          | 542, 431                 | 12.6%        | (8.8-17.5)         | 0.98            | (0.64-1.51) |         | 693, 423                 | 22.5%        | (19.0-26.4)        | 0.70            | (0.55-0.89) |         |                                                     |
| Unemployed                                                   | 707, 723                 | 19.6%        | (16.3-23.4)        | 1.44            | (1.12-1.86) |         | 1681, 1282               | 36.1%        | (33.4-39.0)        | 1.11            | (0.96-1.28) |         |                                                     |
| Retired                                                      | 375, 562                 | 13.6%        | (10.4-17.7)        | 0.75            | (0.52-1.09) |         | 415, 524                 | 35.8%        | (31.0-40.9)        | 0.75            | (0.57-0.99) |         |                                                     |
| <b>Practises religion at least once a month</b>              |                          |              |                    |                 |             | 0.1687  |                          |              |                    |                 |             | 0.0082  | 0.9966                                              |
| No                                                           | 4283, 5179               | 15.3%        | (14.1-16.6)        | 1               | -           |         | 5659, 4754               | 34.8%        | (33.3-36.3)        | 1               | -           |         |                                                     |
| Yes                                                          | 521, 748                 | 12.9%        | (10.0-16.4)        | 0.81            | (0.60-1.09) |         | 956, 945                 | 30.7%        | (27.5-34.2)        | 0.79            | (0.67-0.94) |         |                                                     |

Table 1 cont.

|                                                                 | Men                         |       |             |                 |             |                 | Women                       |       |             |                 |             |                 | <i>p</i> -value for interaction with sex <sup>a</sup> |
|-----------------------------------------------------------------|-----------------------------|-------|-------------|-----------------|-------------|-----------------|-----------------------------|-------|-------------|-----------------|-------------|-----------------|-------------------------------------------------------|
|                                                                 | <i>Denom.</i><br>(unwt, wt) | %     | (95%CI)     | Age-adjusted OR | (95%CI)     | <i>p</i> -value | <i>Denom.</i><br>(unwt, wt) | %     | (95%CI)     | Age-adjusted OR | (95%CI)     | <i>p</i> -value |                                                       |
| <b>Health</b>                                                   |                             |       |             |                 |             |                 |                             |       |             |                 |             |                 |                                                       |
| <b>Self-reported general health</b>                             |                             |       |             |                 |             |                 |                             |       |             |                 |             |                 |                                                       |
|                                                                 |                             |       |             |                 |             | <0.0001         |                             |       |             |                 |             | <0.0001         | 0.1890                                                |
| Very good/Good                                                  | 4123, 5055                  | 13.4% | (12.2-14.6) | 1               | -           |                 | 5683, 4851                  | 32.3% | (30.9-33.8) | 1               | -           |                 |                                                       |
| Fair                                                            | 580, 745                    | 21.9% | (18.3-25.8) | 1.8             | (1.41-2.30) |                 | 780, 709                    | 42.2% | (38.2-46.3) | 1.45            | (1.21-1.75) |                 |                                                       |
| Bad/very bad                                                    | 135, 171                    | 33.9% | (25.3-43.6) | 3.29            | (2.14-5.06) |                 | 206, 195                    | 49.9% | (42.2-57.7) | 1.93            | (1.40-2.67) |                 |                                                       |
| <b>Difficulty walking up stairs because of a health problem</b> |                             |       |             |                 |             |                 |                             |       |             |                 |             |                 |                                                       |
|                                                                 |                             |       |             |                 |             | <0.0001         |                             |       |             |                 |             | 0.0497          | 0.1179                                                |
| No difficulty                                                   | 4475, 5460                  | 14.1% | (12.9-15.3) | 1               | -           |                 | 6062, 5107                  | 33.3% | (31.8-34.7) | 1               | -           |                 |                                                       |
| Some difficulty                                                 | 278, 393                    | 23.0% | (18.1-28.8) | 1.8             | (1.30-2.49) |                 | 450, 482                    | 39.2% | (34.4-44.2) | 1.15            | (0.92-1.43) |                 |                                                       |
| Much difficulty/unable to do this                               | 86, 120                     | 30.9% | (20.9-43.0) | 2.68            | (1.57-4.57) |                 | 157, 166                    | 47.0% | (38.0-56.1) | 1.55            | (1.06-2.25) |                 |                                                       |
| <b>Longstanding illness or disability</b>                       |                             |       |             |                 |             |                 |                             |       |             |                 |             |                 |                                                       |
|                                                                 |                             |       |             |                 |             | <0.0001         |                             |       |             |                 |             | <0.0001         | 0.1348                                                |
| No                                                              | 3585, 4259                  | 12.8% | (11.6-14.2) | 1               | -           |                 | 4843, 4026                  | 31.6% | (30.0-33.2) | 1               | -           |                 |                                                       |
| Yes                                                             | 1253, 1713                  | 20.5% | (18.1-23.1) | 1.76            | (1.44-2.16) |                 | 1825, 1729                  | 40.1% | (37.5-42.8) | 1.35            | (1.17-1.55) |                 |                                                       |
| <b>Number of comorbid conditions<sup>d</sup></b>                |                             |       |             |                 |             |                 |                             |       |             |                 |             |                 |                                                       |
|                                                                 |                             |       |             |                 |             | <0.0001         |                             |       |             |                 |             | <0.0001         | 0.7951                                                |
| 0                                                               | 3453, 3994                  | 12.8% | (11.5-14.1) | 1               | -           |                 | 4357, 3536                  | 29.9% | (28.2-31.5) | 1               | -           |                 |                                                       |
| 1                                                               | 939, 1329                   | 18.9% | (16.2-21.9) | 1.64            | (1.30-2.06) |                 | 1555, 1416                  | 38.6% | (35.9-41.5) | 1.42            | (1.23-1.64) |                 |                                                       |
| >=2                                                             | 446, 650                    | 21.0% | (17.0-25.6) | 1.91            | (1.41-2.60) |                 | 755, 802                    | 45.1% | (41.2-49.1) | 1.75            | (1.45-2.13) |                 |                                                       |
| <b>Depressive symptoms<sup>e</sup></b>                          |                             |       |             |                 |             |                 |                             |       |             |                 |             |                 |                                                       |
|                                                                 |                             |       |             |                 |             | <0.0001         |                             |       |             |                 |             | <0.0001         | 0.6249                                                |
| No                                                              | 4383, 5471                  | 13.5% | (12.4-14.8) | 1               | -           |                 | 5885, 5149                  | 31.7% | (30.2-33.1) | 1               | -           |                 |                                                       |
| Yes                                                             | 449, 495                    | 31.3% | (26.4-36.7) | 2.95            | (2.26-3.85) |                 | 780, 602                    | 55.2% | (51.0-59.5) | 2.79            | (2.32-3.37) |                 |                                                       |
| <b>Treated for depression, past year</b>                        |                             |       |             |                 |             |                 |                             |       |             |                 |             |                 |                                                       |
|                                                                 |                             |       |             |                 |             | <0.0001         |                             |       |             |                 |             | <0.0001         | 0.2447                                                |
| No                                                              | 4524, 5630                  | 14.0% | (12.9-15.2) | 1               | -           |                 | 5770, 5040                  | 31.7% | (30.2-33.2) | 1               | -           |                 |                                                       |
| Yes                                                             | 313, 342                    | 31.5% | (25.7-38.0) | 2.82            | (2.08-3.83) |                 | 897, 713                    | 51.4% | (47.6-55.2) | 2.32            | (1.96-2.75) |                 |                                                       |

Table 1 cont.

|                                                      |                | Men                                  |       |             |                 |             | Women           |                                      |       |             |                 | <i>p</i> -value for interaction with sex <sup>a</sup> |         |                 |
|------------------------------------------------------|----------------|--------------------------------------|-------|-------------|-----------------|-------------|-----------------|--------------------------------------|-------|-------------|-----------------|-------------------------------------------------------|---------|-----------------|
|                                                      |                | <i>Denom.</i><br>( <i>unwt, wt</i> ) | %     | (95%CI)     | Age-adjusted OR | (95%CI)     | <i>p</i> -value | <i>Denom.</i><br>( <i>unwt, wt</i> ) | %     | (95%CI)     | Age-adjusted OR |                                                       | (95%CI) | <i>p</i> -value |
| <b>Menopausal status</b>                             |                |                                      |       |             |                 |             |                 |                                      |       |             |                 |                                                       | 0.9326  |                 |
|                                                      | Not menopausal |                                      |       |             |                 |             |                 | 5485, 4187                           | 32.3% | (30.9-33.8) | 1               | -                                                     |         |                 |
|                                                      | Menopausal     |                                      |       |             |                 |             |                 | 1167, 1548                           | 38.9% | (36.0-41.9) | 0.99            | (0.79-1.24)                                           |         |                 |
| <b>Circumcised</b>                                   |                |                                      |       |             |                 |             |                 |                                      |       |             |                 |                                                       | 0.5951  |                 |
|                                                      | No             | 3909, 4728                           | 15.1% | (13.8-16.4) | 1               | -           |                 |                                      |       |             |                 |                                                       |         |                 |
|                                                      | Yes            | 857, 1166                            | 14.5% | (12.0-17.4) | 0.94            | (0.73-1.20) |                 |                                      |       |             |                 |                                                       |         |                 |
| <b>Sexual behaviour</b>                              |                |                                      |       |             |                 |             |                 |                                      |       |             |                 |                                                       |         |                 |
| <b>Number of occasions of sex, past 4 weeks</b>      |                |                                      |       |             |                 |             |                 |                                      |       |             |                 |                                                       | <0.0001 |                 |
|                                                      | 0              | 1013, 1163                           | 20.7% | (17.8-23.8) | 1               | -           |                 | 1408, 1245                           | 42.9% | (39.9-45.9) | 1               | -                                                     | <0.0001 | 0.4778          |
|                                                      | 1-2            | 1160, 1566                           | 18.7% | (16.2-21.5) | 0.89            | (0.69-1.14) |                 | 1481, 1373                           | 39.6% | (36.7-42.5) | 0.89            | (0.75-1.05)                                           |         |                 |
|                                                      | 3-4            | 870, 1168                            | 12.4% | (10.1-15.1) | 0.54            | (0.41-0.73) |                 | 1240, 1130                           | 33.8% | (30.7-37.0) | 0.7             | (0.58-0.85)                                           |         |                 |
|                                                      | 5+             | 1617, 1869                           | 9.2%  | (7.8-11.0)  | 0.39            | (0.30-0.51) |                 | 2078, 1655                           | 22.6% | (20.5-24.8) | 0.41            | (0.34-0.49)                                           |         |                 |
| <b>Masturbation, past 4 weeks</b>                    |                |                                      |       |             |                 |             |                 |                                      |       |             |                 |                                                       | 0.0458  |                 |
|                                                      | No             | 1297, 1828                           | 13.7% | (11.8-15.8) | 1               | -           |                 | 4032, 3612                           | 36.0% | (34.3-37.7) | 1               | -                                                     | 0.0038  | 0.0005          |
|                                                      | Yes            | 3531, 4132                           | 15.6% | (14.2-17.0) | 1.24            | (1.00-1.52) |                 | 2615, 2114                           | 30.8% | (28.7-33.0) | 0.83            | (0.73-0.94)                                           |         |                 |
| <b>No. of sexual partners, past year<sup>f</sup></b> |                |                                      |       |             |                 |             |                 |                                      |       |             |                 |                                                       | 0.5348  |                 |
|                                                      | 1              | 3573, 4824                           | 15.0% | (13.7-16.3) | 1               | -           |                 | 5440, 5012                           | 35.3% | (33.8-36.8) | 1               | -                                                     | 0.0038  | 0.0183          |
|                                                      | 2              | 539, 513                             | 16.2% | (12.9-20.3) | 1.14            | (0.86-1.52) |                 | 570, 364                             | 28.2% | (23.9-32.8) | 0.80            | (0.63-1.01)                                           |         |                 |
|                                                      | 3+             | 718, 627                             | 13.6% | (11.1-16.6) | 0.94            | (0.72-1.22) |                 | 642, 366                             | 24.8% | (21.0-29.0) | 0.70            | (0.56-0.88)                                           |         |                 |
| <b>Paid for sex, past year</b>                       |                |                                      |       |             |                 |             |                 |                                      |       |             |                 |                                                       | 0.7167  |                 |
|                                                      | No             | 4774, 5896                           | 15.0% | (13.9-16.2) | 1               | -           |                 |                                      |       |             |                 |                                                       |         |                 |
|                                                      | Yes            | 64, 75                               | 13.4% | (6.8-24.7)  | 0.87            | (0.41-1.84) |                 |                                      |       |             |                 |                                                       |         |                 |
| <b>Ever taken drugs to assist sexual performance</b> |                |                                      |       |             |                 |             |                 |                                      |       |             |                 |                                                       | 0.0175  |                 |
|                                                      | No             | 4188, 5180                           | 14.4% | (13.2-15.7) | 1               | -           |                 | 6478, 5624                           | 34.0% | (32.6-35.4) | 1               | -                                                     | 0.0666  | 0.8967          |
|                                                      | Yes            | 636, 776                             | 19.0% | (15.7-22.8) | 1.36            | (1.06-1.76) |                 | 184, 124                             | 40.0% | (32.0-48.5) | 1.39            | (0.98-1.96)                                           |         |                 |

Table 1 cont.

|                                                                                | Men                                |       |             |                        |             |         | Women                              |       |             |                        |             |         |                                                             |
|--------------------------------------------------------------------------------|------------------------------------|-------|-------------|------------------------|-------------|---------|------------------------------------|-------|-------------|------------------------|-------------|---------|-------------------------------------------------------------|
|                                                                                | <i>Denom.</i><br><i>(unwt, wt)</i> | %     | (95%CI)     | Age-<br>adjusted<br>OR | (95%CI)     | p-value | <i>Denom.</i><br><i>(unwt, wt)</i> | %     | (95%CI)     | Age-<br>adjusted<br>OR | (95%CI)     | p-value | <i>p-value for<br/>interaction<br/>with sex<sup>a</sup></i> |
| <b>Relationship context</b>                                                    |                                    |       |             |                        |             |         |                                    |       |             |                        |             |         |                                                             |
| <b>Relationship status</b>                                                     |                                    |       |             |                        |             |         |                                    |       |             |                        |             |         |                                                             |
|                                                                                |                                    |       |             |                        |             | 0.0383  |                                    |       |             |                        |             | <0.0001 | 0.0001                                                      |
| Living with partner                                                            | 2708, 4266                         | 15.5% | (14.1-17.1) | 1                      | -           |         | 3967, 4168                         | 37.9% | (36.3-39.7) | 1                      | -           |         |                                                             |
| In a steady relationship, not<br>living together                               | 947, 760                           | 12.0% | (9.6-14.8)  | 0.76                   | (0.57-1.00) |         | 1360, 790                          | 22.6% | (20.2-25.2) | 0.51                   | (0.43-0.60) |         |                                                             |
| Not in a steady relationship,<br>but previously cohabited                      | 446, 388                           | 18.2% | (14.6-22.5) | 1.22                   | (0.91-1.62) |         | 752, 462                           | 28.9% | (25.4-32.8) | 0.68                   | (0.56-0.83) |         |                                                             |
| Not in a steady relationship,<br>never cohabited                               | 727, 551                           | 12.4% | (9.9-15.5)  | 0.8                    | (0.58-1.09) |         | 580, 330                           | 21.3% | (17.6-25.5) | 0.49                   | (0.38-0.63) |         |                                                             |
| <b>Duration of most recent<br/>sexual relationship</b>                         |                                    |       |             |                        |             |         |                                    |       |             |                        |             |         |                                                             |
|                                                                                |                                    |       |             |                        |             | 0.494   |                                    |       |             |                        |             | <0.0001 | <0.0001                                                     |
| 1 year or less                                                                 | 1462, 1260                         | 13.0% | (11.0-15.3) | 1                      | -           |         | 1597, 998                          | 21.5% | (19.1-24.1) | 1                      | -           |         |                                                             |
| Between 1 and 5 years                                                          | 1247, 1227                         | 15.3% | (13.2-17.7) | 1.21                   | (0.94-1.55) |         | 1758, 1148                         | 28.5% | (26.1-31.0) | 1.45                   | (1.20-1.76) |         |                                                             |
| Between 5 and 15 years                                                         | 1065, 1484                         | 14.9% | (12.6-17.5) | 1.14                   | (0.86-1.50) |         | 1774, 1458                         | 39.8% | (37.2-42.4) | 2.37                   | (1.96-2.86) |         |                                                             |
| Over 15 years                                                                  | 1004, 1904                         | 16.1% | (13.9-18.7) | 1.19                   | (0.87-1.63) |         | 1445, 2036                         | 40.0% | (37.3-42.7) | 2.31                   | (1.84-2.91) |         |                                                             |
| <b>Always easy to talk about<br/>sex with partners<sup>e</sup></b>             |                                    |       |             |                        |             |         |                                    |       |             |                        |             |         |                                                             |
|                                                                                |                                    |       |             |                        |             | 0.0001  |                                    |       |             |                        |             | <0.0001 | 0.0182                                                      |
| Yes                                                                            | 1695, 1899                         | 11.5% | (9.7-13.5)  | 1                      | -           |         | 1746, 1451                         | 22.6% | (20.4-25.1) | 1                      | -           |         |                                                             |
| No/other                                                                       | 3122, 4048                         | 16.7% | (15.3-18.2) | 1.53                   | (1.23-1.90) |         | 4907, 4289                         | 38.0% | (36.4-39.6) | 2.06                   | (1.77-2.39) |         |                                                             |
| <b>Happy with relationship<sup>h</sup></b>                                     |                                    |       |             |                        |             |         |                                    |       |             |                        |             |         |                                                             |
|                                                                                |                                    |       |             |                        |             | <0.0001 |                                    |       |             |                        |             | <0.0001 | 0.8679                                                      |
| Yes                                                                            | 1951, 2791                         | 12.6% | (11.0-14.4) | 1                      | -           |         | 2736, 2601                         | 31.5% | (29.5-33.6) | 1                      | -           |         |                                                             |
| Other                                                                          | 995, 1430                          | 21.0% | (18.4-23.9) | 1.85                   | (1.47-2.32) |         | 1640, 1617                         | 45.4% | (42.7-48.1) | 1.79                   | (1.55-2.08) |         |                                                             |
| <b>Participant does not share same level of<br/>interest in sex as partner</b> |                                    |       |             |                        |             |         |                                    |       |             |                        |             |         |                                                             |
|                                                                                |                                    |       |             |                        |             | 0.2339  |                                    |       |             |                        |             | <0.0001 | <0.0001                                                     |
| No/other                                                                       | 2270, 3233                         | 15.0% | (13.4-16.7) | 1                      | -           |         | 3211, 3064                         | 27.2% | (25.4-29.0) | 1                      | -           |         |                                                             |
| Yes                                                                            | 676, 988                           | 17.1% | (14.2-20.4) | 1.17                   | (0.90-1.51) |         | 1166, 1155                         | 62.5% | (59.2-65.7) | 4.57                   | (3.87-5.38) |         |                                                             |

Table 1 cont.

|                                                                               | Men                                  |       |             |                    |             |         | Women                                |       |             |                    |             |         |                                                     |
|-------------------------------------------------------------------------------|--------------------------------------|-------|-------------|--------------------|-------------|---------|--------------------------------------|-------|-------------|--------------------|-------------|---------|-----------------------------------------------------|
|                                                                               | <i>Denom.</i><br>( <i>unwt, wt</i> ) | %     | (95%CI)     | Age-adjusted<br>OR | (95%CI)     | p-value | <i>Denom.</i><br>( <i>unwt, wt</i> ) | %     | (95%CI)     | Age-adjusted<br>OR | (95%CI)     | p-value | <i>p-value for interaction with sex<sup>a</sup></i> |
| <b>Participant does not share same sexual likes &amp; dislikes as partner</b> |                                      |       |             |                    |             | 0.4188  |                                      |       |             |                    |             | <0.0001 | <0.0001                                             |
| No/other                                                                      | 2650, 3803                           | 15.3% | (13.8-16.9) | 1                  | -           |         | 4079, 3908                           | 34.9% | (33.3-36.6) | 1                  | -           |         |                                                     |
| Yes                                                                           | 296, 418                             | 17.3% | (13.0-22.5) | 1.16               | (0.81-1.66) |         | 297, 310                             | 61.0% | (54.6-67.2) | 2.91               | (2.22-3.83) |         |                                                     |
| <b>Partner experienced sexual difficulties in past year</b>                   |                                      |       |             |                    |             | 0.0136  |                                      |       |             |                    |             | <0.0001 | 0.4140                                              |
| No/other                                                                      | 2431, 3454                           | 14.6% | (13.1-16.2) | 1                  | -           |         | 3726, 3498                           | 34.8% | (33.1-36.6) | 1                  | -           |         |                                                     |
| Yes                                                                           | 513, 763                             | 19.4% | (15.8-23.6) | 1.41               | (1.07-1.86) |         | 649, 719                             | 46.8% | (42.5-51.1) | 1.60               | (1.32-1.94) |         |                                                     |
| <b>Does not feel emotionally close to partner when have sex</b>               |                                      |       |             |                    |             | 0.0006  |                                      |       |             |                    |             | <0.0001 | 0.5972                                              |
| No/other                                                                      | 2904, 4165                           | 15.1% | (13.7-16.6) | 1                  | -           |         | 4263, 4108                           | 35.9% | (34.3-37.6) | 1                  | -           |         |                                                     |
| Yes                                                                           | 42, 56                               | 39.9% | (23.6-58.8) | 3.74               | (1.76-7.93) |         | 112, 109                             | 73.0% | (62.8-81.3) | 4.80               | (2.99-7.69) |         |                                                     |
| <b>Lifestyle</b>                                                              |                                      |       |             |                    |             |         |                                      |       |             |                    |             |         |                                                     |
| <b>1+ child(ren) aged &lt;5 in household</b>                                  |                                      |       |             |                    |             | 0.9088  |                                      |       |             |                    |             | <0.0001 | 0.0216                                              |
| No, none                                                                      | 4100, 5015                           | 15.2% | (13.9-16.5) | 1                  | -           |         | 4997, 4671                           | 33.1% | (31.6-34.6) | 1                  | -           |         |                                                     |
| Yes, 1+                                                                       | 727, 941                             | 14.5% | (11.9-17.6) | 0.98               | (0.76-1.28) |         | 1664, 1074                           | 38.6% | (36.0-41.4) | 1.55               | (1.34-1.79) |         |                                                     |
| <b>Pregnant in the last year</b>                                              |                                      |       |             |                    |             |         |                                      |       |             |                    |             | 0.0114  |                                                     |
| No                                                                            |                                      |       |             |                    |             |         | 4227, 4122                           | 36.2% | (34.6-37.9) | 1                  | -           |         |                                                     |
| Yes                                                                           |                                      |       |             |                    |             |         | 437, 273                             | 41.7% | (36.6-47.1) | 1.36               | (1.07-1.72) |         |                                                     |
| <b>Used hormonal contraceptive, past year</b>                                 |                                      |       |             |                    |             |         |                                      |       |             |                    |             | 0.05    |                                                     |
| No                                                                            |                                      |       |             |                    |             |         | 3759, 3838                           | 34.8% | (33.1-36.5) | 1                  | -           |         |                                                     |
| Yes                                                                           |                                      |       |             |                    |             |         | 2806, 1831                           | 33.0% | (30.9-35.1) | 1.15               | (1.00-1.33) |         |                                                     |
| <b>Sexual health indicators</b>                                               |                                      |       |             |                    |             |         |                                      |       |             |                    |             |         |                                                     |
| <b>Ever diagnosed with a sexually transmitted infection</b>                   |                                      |       |             |                    |             | <0.0001 |                                      |       |             |                    |             | 0.0004  | 0.0651                                              |
| No (or only thrush)                                                           | 4147, 5127                           | 14.0% | (12.8-15.3) | 1                  | -           |         | 5455, 4861                           | 33.4% | (31.9-34.9) | 1                  | -           |         |                                                     |
| Yes (excluding thrush)                                                        | 677, 830                             | 21.4% | (18.1-25.0) | 1.67               | (1.33-2.10) |         | 1206, 888                            | 38.2% | (35.1-41.5) | 1.32               | (1.13-1.54) |         |                                                     |



Table 1 cont.

|                                                                         | Men                                  |       |             |                    |             |                 | Women                                |       |             |                    |             |                 | <i>p</i> -value for interaction with sex <sup>a</sup> |
|-------------------------------------------------------------------------|--------------------------------------|-------|-------------|--------------------|-------------|-----------------|--------------------------------------|-------|-------------|--------------------|-------------|-----------------|-------------------------------------------------------|
|                                                                         | <i>Denom.</i><br>( <i>unwt, wt</i> ) | %     | (95%CI)     | Age-adjusted<br>OR | (95%CI)     | <i>p</i> -value | <i>Denom.</i><br>( <i>unwt, wt</i> ) | %     | (95%CI)     | Age-adjusted<br>OR | (95%CI)     | <i>p</i> -value |                                                       |
| <b>Ever experienced non-volitional sex</b>                              |                                      |       |             |                    |             | 0.0010          |                                      |       |             |                    |             | <0.0001         | 0.3164                                                |
| No                                                                      | 4705, 5824                           | 14.7% | (13.6-16.0) | 1                  | -           |                 | 5815, 5055                           | 32.8% | (31.4-34.2) | 1                  | -           |                 |                                                       |
| Yes/Don't know                                                          | 133, 148                             | 26.1% | (18.9-34.9) | 2.07               | (1.34-3.18) |                 | 848, 695                             | 44.3% | (40.5-48.3) | 1.66               | (1.40-1.97) |                 |                                                       |
| <b>Sexual competence at first sex<sup>i</sup></b>                       |                                      |       |             |                    |             | 0.0706          |                                      |       |             |                    |             | <0.0001         | 0.1797                                                |
| Not competent                                                           | 2407, 3037                           | 16.2% | (14.6-17.9) | 1                  | -           |                 | 3438, 2927                           | 37.6% | (35.7-39.5) | 1                  | -           |                 |                                                       |
| Competent                                                               | 2302, 2784                           | 13.7% | (12.1-15.4) | 0.84               | (0.69-1.01) |                 | 3097, 2716                           | 30.3% | (28.4-32.3) | 0.73               | (0.65-0.83) |                 |                                                       |
| <b>Number of other sexual response problems experienced<sup>j</sup></b> |                                      |       |             |                    |             | <0.0001         |                                      |       |             |                    |             | <0.0001         | 0.0015                                                |
| 0                                                                       | 3208, 3945                           | 11.7% | (10.5-13.1) | 1                  | -           |                 | 4377, 3759                           | 25.3% | (23.8-26.9) | 1                  | -           |                 |                                                       |
| 1                                                                       | 1061, 1350                           | 10.9% | (9.0-13.2)  | 0.91               | (0.71-1.17) |                 | 1217, 1087                           | 34.8% | (31.7-38.0) | 1.55               | (1.32-1.82) |                 |                                                       |
| 2+                                                                      | 570, 678                             | 42.5% | (37.9-47.2) | 5.58               | (4.41-7.04) |                 | 1075, 909                            | 69.8% | (66.5-72.9) | 6.91               | (5.82-8.21) |                 |                                                       |
| <b>Attitudes</b>                                                        |                                      |       |             |                    |             |                 |                                      |       |             |                    |             |                 |                                                       |
| <b>People are under pressure to have sex</b>                            |                                      |       |             |                    |             | 0.0115          |                                      |       |             |                    |             | 0.0001          | 0.7970                                                |
| Else                                                                    | 1799, 2264                           | 13.1% | (11.4-15.0) | 1                  | -           |                 | 1851, 1570                           | 29.3% | (26.8-31.9) | 1                  | -           |                 |                                                       |
| Strongly agree/agree                                                    | 3038, 3707                           | 16.2% | (14.7-17.8) | 1.29               | (1.06-1.57) |                 | 4817, 4185                           | 36.0% | (34.4-37.6) | 1.34               | (1.16-1.54) |                 |                                                       |
| <b>People want less sex as they age</b>                                 |                                      |       |             |                    |             | <0.0001         |                                      |       |             |                    |             | <0.0001         | 0.9443                                                |
| Else                                                                    | 2943, 3472                           | 11.4% | (10.2-12.8) | 1                  | -           |                 | 4044, 3278                           | 27.8% | (26.2-29.4) | 1                  | -           |                 |                                                       |
| Strongly agree/agree                                                    | 1894, 2499                           | 20.0% | (18.0-22.2) | 1.93               | (1.61-2.32) |                 | 2624, 2477                           | 42.6% | (40.4-44.8) | 1.85               | (1.63-2.10) |                 |                                                       |
| <b>Men have a naturally higher sex drive than women</b>                 |                                      |       |             |                    |             | <0.0001         |                                      |       |             |                    |             | <0.0001         | <0.0001                                               |
| Else                                                                    | 2788, 3441                           | 18.0% | (16.4-19.7) | 1                  | -           |                 | 3351, 2830                           | 26.0% | (24.3-27.8) | 1                  | -           |                 |                                                       |
| Strongly agree/agree                                                    | 2049, 2530                           | 10.9% | (9.4-12.6)  | 0.56               | (0.46-0.68) |                 | 3317, 2925                           | 42.0% | (40.0-44.1) | 2.04               | (1.80-2.31) |                 |                                                       |
| <b>Too much sex in the media</b>                                        |                                      |       |             |                    |             | 0.7069          |                                      |       |             |                    |             | 0.1807          | 0.4835                                                |
| Else                                                                    | 1986, 2296                           | 14.6% | (12.8-16.6) | 1                  | -           |                 | 2091, 1618                           | 31.7% | (29.3-34.2) | 1                  | -           |                 |                                                       |
| Strongly agree/agree                                                    | 2851, 3675                           | 15.3% | (13.8-16.9) | 1.04               | (0.85-1.26) |                 | 4577, 4137                           | 35.1% | (33.5-36.8) | 1.10               | (0.96-1.26) |                 |                                                       |

1  
2  
3  
4  
5 Denominator is those aged 16-74 years with at least one partner in the past year. Unwt, unweighted; wt, weighted

6 <sup>a</sup> P-value for interaction to determine whether the magnitude of association between each variable and lack of interest in sex differs between men and women

7  
8 <sup>b</sup> IMD is a multidimensional measure of area (neighbourhood)-level deprivation based on the participant's postcode. IMD scores for England, Scotland and Wales were adjusted before being  
9 combined and assigned to quintiles, using a method by Payne and Abel (50).

10 <sup>c</sup> Participants aged  $\geq 17$  years.

11 <sup>d</sup> Includes arthritis, heart attack, coronary heart disease, angina, other forms of heart disease, hypertension, stroke, diabetes, broken hip or pelvis, bone or hip replacement ever, backache  
12 lasting longer than 3 months, any other muscle or bone disease lasting longer than 3 months, depression, cancer and any thyroid condition treated in the past year.

13 <sup>e</sup> Participants were asked whether they had often been bothered by feeling down, depressed, or hopeless in the past 2 weeks, and whether they had often been bothered by little interest or  
14 pleasure in doing things in the past 2 weeks, using a validated two-question patient health questionnaire (PHQ-2).

15 <sup>f</sup> Opposite and/or same-sex partners

16  
17 <sup>g</sup> Other means easy with a husband or wife or regular partner, but difficult with a new partner; easy with a new partner, but difficult with a husband or wife or regular partner; difficult with any  
18 partner, it depends, sometimes easy, and sometimes difficult.

19 <sup>h</sup> Participants were asked to rate how happy they were in their relationship from 1 (very happy) to 7 (very unhappy); responses of 1 or 2 were regarded as denoting participants who were happy  
20 with their relationship.

21 <sup>i</sup> A constructed variable to measure readiness, combining consensuality, autonomy of decision making, timing and use of effective contraception

22 <sup>j</sup> Sexual response problems (for at least 3 months in past year): lacked enjoyment in sex, felt anxious during sex, felt physical pain as a result of sex, felt no excitement or arousal during sex,  
23 difficulty in reaching climax, reached a climax more quickly than you would like, trouble getting or keep an erection (men), uncomfortably dry vagina (women)

Table 2: Factors associated with lacking interest in having sex for at least 3 months in the past year and being distressed about it in sexually active men and women

|                                                              | Men                                  |             |                  |                    |             |                 | Women                                |              |                    |                    |             |                 | <i>p</i> -value for interaction with sex <sup>a</sup> |
|--------------------------------------------------------------|--------------------------------------|-------------|------------------|--------------------|-------------|-----------------|--------------------------------------|--------------|--------------------|--------------------|-------------|-----------------|-------------------------------------------------------|
|                                                              | <i>Denom.</i><br>( <i>unwt, wt</i> ) | %           | (95%CI)          | Age-adjusted<br>OR | (95%CI)     | <i>p</i> -value | <i>Denom.</i><br>( <i>unwt, wt</i> ) | %            | (95%CI)            | Age-adjusted<br>OR | (95%CI)     | <i>p</i> -value |                                                       |
| <b>All</b>                                                   | <b>4839, 5973</b>                    | <b>8.2%</b> | <b>(7.4-9.1)</b> |                    |             |                 | <b>6669, 5755</b>                    | <b>20.8%</b> | <b>(19.6-22.0)</b> |                    |             |                 |                                                       |
| <b>Socio-demographics</b>                                    |                                      |             |                  |                    |             |                 |                                      |              |                    |                    |             |                 |                                                       |
| <b>Age group</b>                                             |                                      |             |                  |                    |             | 0.0011          |                                      |              |                    |                    |             | <0.0001         | 0.8971                                                |
| 16-24                                                        | 1279, 936                            | 4.8%        | (3.7-6.4)        | 1                  | -           |                 | 1662, 923                            | 15.2%        | (13.4-17.3)        | 1                  | -           |                 |                                                       |
| 25-34                                                        | 1376, 1238                           | 8.0%        | (6.7-9.5)        | 1.7                | (1.19-2.41) |                 | 2236, 1246                           | 20.9%        | (19.0-22.8)        | 1.47               | (1.22-1.76) |                 |                                                       |
| 35-44                                                        | 719, 1298                            | 9.6%        | (7.5-12.3)       | 2.09               | (1.40-3.13) |                 | 1050, 1290                           | 22.9%        | (20.3-25.7)        | 1.65               | (1.34-2.04) |                 |                                                       |
| 45-54                                                        | 630, 1186                            | 9.7%        | (7.4-12.6)       | 2.11               | (1.38-3.22) |                 | 871, 1186                            | 23.3%        | (20.4-26.6)        | 1.69               | (1.35-2.13) |                 |                                                       |
| 55-64                                                        | 512, 849                             | 9.4%        | (7.0-12.6)       | 2.04               | (1.30-3.21) |                 | 569, 755                             | 21.8%        | (18.3-25.8)        | 1.55               | (1.20-2.01) |                 |                                                       |
| 65-74                                                        | 323, 467                             | 5.5%        | (3.4-8.6)        | 1.13               | (0.65-1.99) |                 | 281, 355                             | 16.5%        | (12.4-21.7)        | 1.10               | (0.76-1.59) |                 |                                                       |
| <b>Index of Multiple Deprivation (quintiles)<sup>b</sup></b> |                                      |             |                  |                    |             | 0.8339          |                                      |              |                    |                    |             | 0.0938          | 0.4592                                                |
| 1 (least deprived)                                           | 977, 1279                            | 8.1%        | (6.2-10.4)       | 1                  | -           |                 | 1248, 1208                           | 23.3%        | (20.7-26.1)        | 1                  | -           |                 |                                                       |
| 2                                                            | 962, 1264                            | 7.4%        | (5.7-9.6)        | 0.92               | (0.62-1.36) |                 | 1290, 1208                           | 20.8%        | (18.2-23.5)        | 0.87               | (0.69-1.09) |                 |                                                       |
| 3                                                            | 942, 1169                            | 8.3%        | (6.4-10.6)       | 1.05               | (0.71-1.55) |                 | 1299, 1116                           | 19.6%        | (17.1-22.4)        | 0.82               | (0.65-1.03) |                 |                                                       |
| 4                                                            | 967, 1184                            | 8.8%        | (6.9-11.1)       | 1.14               | (0.78-1.66) |                 | 1384, 1137                           | 21.9%        | (19.3-24.7)        | 0.95               | (0.76-1.18) |                 |                                                       |
| 5 (most deprived)                                            | 991, 1077                            | 8.6%        | (6.7-10.9)       | 1.12               | (0.75-1.65) |                 | 1448, 1086                           | 18.2%        | (15.9-20.6)        | 0.75               | (0.60-0.94) |                 |                                                       |
| <b>Education level<sup>c</sup></b>                           |                                      |             |                  |                    |             | 0.4958          |                                      |              |                    |                    |             | 0.7324          | 0.4496                                                |
| Left school aged 17+                                         | 2862, 3464                           | 7.9%        | (6.8-9.2)        | 1                  | -           |                 | 4150, 3406                           | 20.8%        | (19.4-22.4)        | 1                  | -           |                 |                                                       |
| Left school at 16                                            | 1873, 2437                           | 8.8%        | (7.5-10.4)       | 1.09               | (0.85-1.41) |                 | 2409, 2287                           | 21.1%        | (19.3-23.1)        | 0.97               | (0.83-1.14) |                 |                                                       |
| <b>Employment status</b>                                     |                                      |             |                  |                    |             | 0.0001          |                                      |              |                    |                    |             | 0.0003          | 0.1244                                                |
| Employed                                                     | 3211, 4254                           | 8.3%        | (7.3-9.5)        | 1                  | -           |                 | 3871, 3517                           | 21.6%        | (20.1-23.2)        | 1                  | -           |                 |                                                       |
| Full-time education                                          | 542, 431                             | 4.9%        | (2.8-8.6)        | 0.74               | (0.38-1.44) |                 | 693, 423                             | 14.8%        | (11.8-18.4)        | 0.75               | (0.56-1.01) |                 |                                                       |
| Unemployed                                                   | 707, 723                             | 12.1%       | (9.5-15.3)       | 1.56               | (1.14-2.13) |                 | 1681, 1282                           | 22.3%        | (19.9-24.9)        | 1.07               | (0.90-1.27) |                 |                                                       |
| Retired                                                      | 375, 562                             | 4.9%        | (3.1-7.6)        | 0.41               | (0.23-0.71) |                 | 415, 524                             | 16.8%        | (13.4-20.8)        | 0.57               | (0.41-0.79) |                 |                                                       |
| <b>Practises religion at least once a month</b>              |                                      |             |                  |                    |             | 0.1638          |                                      |              |                    |                    |             | 0.0167          | 0.8143                                                |
| No                                                           | 4283, 5179                           | 8.5%        | (7.5-9.5)        | 1                  | -           |                 | 5659, 4754                           | 21.5%        | (20.2-22.9)        | 1                  | -           |                 |                                                       |
| Yes                                                          | 521, 748                             | 6.4%        | (4.4-9.4)        | 0.73               | (0.48-1.13) |                 | 956, 945                             | 18.0%        | (15.3-20.9)        | 0.78               | (0.63-0.96) |                 |                                                       |

Table 2 cont.

|                                                                 | Men                         |       |             |                 |             |                 | Women                       |       |             |                 |             |                 | <i>p</i> -value for interaction with sex <sup>a</sup> |
|-----------------------------------------------------------------|-----------------------------|-------|-------------|-----------------|-------------|-----------------|-----------------------------|-------|-------------|-----------------|-------------|-----------------|-------------------------------------------------------|
|                                                                 | <i>Denom.</i><br>(unwt, wt) | %     | (95%CI)     | Age-adjusted OR | (95%CI)     | <i>p</i> -value | <i>Denom.</i><br>(unwt, wt) | %     | (95%CI)     | Age-adjusted OR | (95%CI)     | <i>p</i> -value |                                                       |
| <b>Health</b>                                                   |                             |       |             |                 |             |                 |                             |       |             |                 |             |                 |                                                       |
| <b>Self-reported general health</b>                             |                             |       |             |                 |             | <0.0001         |                             |       |             |                 |             | <0.0001         | 0.0969                                                |
| Very good/Good                                                  | 4123, 5055                  | 7.0%  | (6.1-7.9)   | 1               | -           |                 | 5683, 4851                  | 19.2% | (18.0-20.5) | 1               | -           |                 |                                                       |
| Fair                                                            | 580, 745                    | 13.3% | (10.5-16.8) | 2.04            | (1.50-2.78) |                 | 780, 709                    | 27.9% | (24.3-31.9) | 1.60            | (1.30-1.97) |                 |                                                       |
| Bad/very bad                                                    | 135, 171                    | 22.6% | (15.3-32.1) | 3.85            | (2.31-6.40) |                 | 206, 195                    | 33.4% | (26.3-41.4) | 2.05            | (1.45-2.91) |                 |                                                       |
| <b>Difficulty walking up stairs because of a health problem</b> |                             |       |             |                 |             | 0.0001          |                             |       |             |                 |             | 0.0085          | 0.1553                                                |
| No difficulty                                                   | 4475, 5460                  | 7.6%  | (6.7-8.6)   | 1               | -           |                 | 6062, 5107                  | 20.1% | (18.9-21.4) | 1               | -           |                 |                                                       |
| Some difficulty                                                 | 278, 393                    | 12.3% | (8.8-17.0)  | 1.67            | (1.11-2.52) |                 | 450, 482                    | 24.1% | (20.0-28.7) | 1.21            | (0.93-1.59) |                 |                                                       |
| Much difficulty/unable to do this                               | 86, 120                     | 22.2% | (13.5-34.2) | 3.36            | (1.79-6.32) |                 | 157, 166                    | 32.3% | (24.3-41.5) | 1.81            | (1.21-2.70) |                 |                                                       |
| <b>Longstanding illness or disability</b>                       |                             |       |             |                 |             | <0.0001         |                             |       |             |                 |             | <0.0001         | 0.0345                                                |
| No                                                              | 3585, 4259                  | 6.5%  | (5.6-7.5)   | 1               | -           |                 | 4843, 4026                  | 18.7% | (17.4-20.0) | 1               | -           |                 |                                                       |
| Yes                                                             | 1253, 1713                  | 12.5% | (10.6-14.8) | 2.09            | (1.60-2.74) |                 | 1825, 1729                  | 25.7% | (23.4-28.2) | 1.48            | (1.27-1.74) |                 |                                                       |
| <b>Number of comorbid conditions<sup>d</sup></b>                |                             |       |             |                 |             | <0.0001         |                             |       |             |                 |             | <0.0001         | 0.5779                                                |
| 0                                                               | 3453, 3994                  | 6.4%  | (5.5-7.5)   | 1               | -           |                 | 4357, 3536                  | 17.3% | (15.9-18.7) | 1               | -           |                 |                                                       |
| 1                                                               | 939, 1329                   | 11.0% | (9.0-13.4)  | 1.88            | (1.37-2.57) |                 | 1555, 1416                  | 24.1% | (21.7-26.7) | 1.54            | (1.30-1.83) |                 |                                                       |
| ≥2                                                              | 446, 650                    | 13.3% | (10.1-17.4) | 2.40            | (1.61-3.59) |                 | 755, 802                    | 30.5% | (26.8-34.4) | 2.16            | (1.74-2.69) |                 |                                                       |
| <b>Depressive symptoms<sup>e</sup></b>                          |                             |       |             |                 |             | <0.0001         |                             |       |             |                 |             | <0.0001         | 0.0370                                                |
| No                                                              | 4383, 5471                  | 6.8%  | (6.0-7.7)   | 1               | -           |                 | 5885, 5149                  | 18.6% | (17.4-19.8) | 1               | -           |                 |                                                       |
| Yes                                                             | 449, 495                    | 23.7% | (19.3-28.9) | 4.36            | (3.20-5.94) |                 | 780, 602                    | 39.6% | (35.4-44.0) | 2.94            | (2.41-3.59) |                 |                                                       |
| <b>Treated for depression, past year</b>                        |                             |       |             |                 |             | <0.0001         |                             |       |             |                 |             | <0.0001         | 0.0371                                                |
| No                                                              | 4524, 5630                  | 7.3%  | (6.5-8.2)   | 1               | -           |                 | 5770, 5040                  | 18.5% | (17.3-19.8) | 1               | -           |                 |                                                       |
| Yes                                                             | 313, 342                    | 23.0% | (17.9-29.1) | 3.81            | (2.71-5.36) |                 | 897, 713                    | 36.4% | (32.9-40.2) | 2.54            | (2.12-3.03) |                 |                                                       |

Table 2 cont.

|                                                          | Men                                |       |            |                        |             |             | Women                              |       |             |                        |             |         |                                                             |
|----------------------------------------------------------|------------------------------------|-------|------------|------------------------|-------------|-------------|------------------------------------|-------|-------------|------------------------|-------------|---------|-------------------------------------------------------------|
|                                                          | <i>Denom.</i><br><i>(unwt, wt)</i> | %     | (95%CI)    | Age-<br>adjusted<br>OR | (95%CI)     | p-value     | <i>Denom.</i><br><i>(unwt, wt)</i> | %     | (95%CI)     | Age-<br>adjusted<br>OR | (95%CI)     | p-value | <i>p-value for<br/>interaction<br/>with sex<sup>a</sup></i> |
| <b>Menopausal status</b>                                 |                                    |       |            |                        |             |             |                                    |       |             |                        |             |         | 0.9656                                                      |
| Not menopausal                                           |                                    |       |            |                        |             |             | 5485, 4187                         | 20.2% | (18.9-21.5) | 1                      | -           |         |                                                             |
| Menopausal                                               |                                    |       |            |                        |             |             | 1167, 1548                         | 22.5% | (20.0-25.2) | 1.01                   | (0.76-1.32) |         |                                                             |
| <b>Circumcised</b>                                       |                                    |       |            |                        |             | 0.4097      |                                    |       |             |                        |             |         |                                                             |
| No                                                       | 3909, 4728                         | 8.3%  | (7.4-9.4)  | 1                      | -           |             |                                    |       |             |                        |             |         |                                                             |
| Yes                                                      | 857, 1166                          | 7.5%  | (5.7-9.9)  | 0.87                   | (0.62-1.22) |             |                                    |       |             |                        |             |         |                                                             |
| <b>Sexual behaviour</b>                                  |                                    |       |            |                        |             |             |                                    |       |             |                        |             |         |                                                             |
| <b>Number of occasions of sex,<br/>past 4 weeks</b>      |                                    |       |            |                        |             | <0.000<br>1 |                                    |       |             |                        |             |         | <0.0001<br>0.5496                                           |
| 0                                                        | 1013, 1163                         | 10.3% | (8.3-12.7) | 1                      | -           |             | 1408, 1245                         | 23.2% | (20.7-26.0) | 1                      | -           |         |                                                             |
| 1-2                                                      | 1160, 1566                         | 10.5% | (8.6-12.8) | 1.02                   | (0.74-1.42) |             | 1481, 1373                         | 24.2% | (21.8-26.9) | 1.06                   | (0.87-1.30) |         |                                                             |
| 3-4                                                      | 870, 1168                          | 7.4%  | (5.6-9.8)  | 0.71                   | (0.48-1.04) |             | 1240, 1130                         | 21.3% | (18.7-24.2) | 0.91                   | (0.73-1.13) |         |                                                             |
| 5+                                                       | 1617, 1869                         | 5.0%  | (3.9-6.4)  | 0.46                   | (0.33-0.66) |             | 2078, 1655                         | 14.7% | (12.9-16.7) | 0.58                   | (0.47-0.72) |         |                                                             |
| <b>Masturbation, past 4 weeks</b>                        |                                    |       |            |                        |             | 0.0164      |                                    |       |             |                        |             |         | 0.7265<br>0.0309                                            |
| No                                                       | 1297, 1828                         | 6.9%  | (5.5-8.6)  | 1                      | -           |             | 4032, 3612                         | 21.1% | (19.6-22.6) | 1                      | -           |         |                                                             |
| Yes                                                      | 3531, 4132                         | 8.8%  | (7.7-9.9)  | 1.42                   | (1.07-1.88) |             | 2615, 2114                         | 20.3% | (18.4-22.2) | 0.97                   | (0.84-1.13) |         |                                                             |
| <b>No. of sexual partners, past<br/>year<sup>f</sup></b> |                                    |       |            |                        |             | 0.2466      |                                    |       |             |                        |             |         | 0.0016<br>0.4744                                            |
| 1                                                        | 3573, 4824                         | 8.5%  | (7.5-9.6)  | 1                      | -           |             | 5440, 5012                         | 21.6% | (20.3-22.9) | 1                      | -           |         |                                                             |
| 2                                                        | 539, 513                           | 6.3%  | (4.3-9.1)  | 0.75                   | (0.49-1.14) |             | 570, 364                           | 16.7% | (13.3-20.6) | 0.75                   | (0.57-0.99) |         |                                                             |
| 3+                                                       | 718, 627                           | 6.8%  | (5.1-9.0)  | 0.82                   | (0.59-1.15) |             | 642, 366                           | 14.1% | (11.0-17.7) | 0.62                   | (0.46-0.83) |         |                                                             |
| <b>Paid for sex, past year</b>                           |                                    |       |            |                        |             | 0.4865      |                                    |       |             |                        |             |         |                                                             |
| No                                                       | 4774, 5896                         | 8.2%  | (7.4-9.2)  | 1                      | -           |             |                                    |       |             |                        |             |         |                                                             |
| Yes                                                      | 64, 75                             | 5.6%  | (1.8-16.4) | 0.66                   | (0.20-2.15) |             |                                    |       |             |                        |             |         |                                                             |
| <b>Ever taken drugs to assist<br/>sexual performance</b> |                                    |       |            |                        |             | 0.0022      |                                    |       |             |                        |             |         | 0.1055<br>0.5305                                            |
| No                                                       | 4188, 5180                         | 7.6%  | (6.7-8.6)  | 1                      | -           |             | 6478, 5624                         | 20.6% | (19.5-21.8) | 1                      | -           |         |                                                             |
| Yes                                                      | 636, 776                           | 12.1% | (9.5-15.4) | 1.63                   | (1.19-2.23) |             | 184, 124                           | 25.9% | (19.2-33.9) | 1.38                   | (0.93-2.05) |         |                                                             |

Table 2 cont.

|                                                                            | Men                         |       |             |                 |             |                 | Women                       |       |             |                 |             |                 | <i>p</i> -value for interaction with sex <sup>a</sup> |
|----------------------------------------------------------------------------|-----------------------------|-------|-------------|-----------------|-------------|-----------------|-----------------------------|-------|-------------|-----------------|-------------|-----------------|-------------------------------------------------------|
|                                                                            | <i>Denom.</i><br>(unwt, wt) | %     | (95%CI)     | Age-adjusted OR | (95%CI)     | <i>p</i> -value | <i>Denom.</i><br>(unwt, wt) | %     | (95%CI)     | Age-adjusted OR | (95%CI)     | <i>p</i> -value |                                                       |
| <b>Relationship context</b>                                                |                             |       |             |                 |             |                 |                             |       |             |                 |             |                 |                                                       |
| <b>Relationship status</b>                                                 |                             |       |             |                 |             |                 |                             |       |             |                 |             |                 |                                                       |
|                                                                            |                             |       |             |                 |             | 0.03            |                             |       |             |                 |             | <0.0001         | 0.0307                                                |
| Living with partner                                                        | 2708, 4266                  | 8.8%  | (7.7-10.1)  | 1               | -           |                 | 3967, 4168                  | 23.4% | (21.9-24.9) | 1               | -           |                 |                                                       |
| In a steady relationship, not living together                              | 947, 760                    | 6.9%  | (5.3-9.0)   | 0.78            | (0.56-1.09) |                 | 1360, 790                   | 15.4% | (13.4-17.7) | 0.59            | (0.49-0.71) |                 |                                                       |
| Not in a steady relationship, but previously cohabited                     | 446, 388                    | 8.8%  | (6.2-12.2)  | 1.00            | (0.67-1.48) |                 | 752, 462                    | 13.6% | (11.1-16.6) | 0.51            | (0.40-0.66) |                 |                                                       |
| Not in a steady relationship, never cohabited                              | 727, 551                    | 4.7%  | (3.3-6.8)   | 0.52            | (0.34-0.81) |                 | 580, 330                    | 11.0% | (8.2-14.5)  | 0.39            | (0.28-0.55) |                 |                                                       |
| <b>Duration of most recent sexual relationship</b>                         |                             |       |             |                 |             |                 |                             |       |             |                 |             |                 |                                                       |
|                                                                            |                             |       |             |                 |             | 0.0143          |                             |       |             |                 |             | <0.0001         | 0.0719                                                |
| 1 year or less                                                             | 1462, 1260                  | 5.5%  | (4.3-7.1)   | 1               | -           |                 | 1597, 998                   | 11.2% | (9.4-13.2)  | 1               | -           |                 |                                                       |
| Between 1 and 5 years                                                      | 1247, 1227                  | 9.0%  | (7.3-11.0)  | 1.67            | (1.18-2.36) |                 | 1758, 1148                  | 18.5% | (16.5-20.7) | 1.81            | (1.44-2.29) |                 |                                                       |
| Between 5 and 15 years                                                     | 1065, 1484                  | 9.3%  | (7.5-11.6)  | 1.68            | (1.17-2.43) |                 | 1774, 1458                  | 25.2% | (23.0-27.6) | 2.81            | (2.23-3.55) |                 |                                                       |
| Over 15 years                                                              | 1004, 1904                  | 8.8%  | (7.1-10.8)  | 1.47            | (0.97-2.22) |                 | 1445, 2036                  | 23.8% | (21.5-26.2) | 2.83            | (2.13-3.75) |                 |                                                       |
| <b>Always easy to talk about sex with partners<sup>e</sup></b>             |                             |       |             |                 |             |                 |                             |       |             |                 |             |                 |                                                       |
|                                                                            |                             |       |             |                 |             | 0               |                             |       |             |                 |             | <0.0001         | 0.4854                                                |
| Yes                                                                        | 1695, 1899                  | 4.8%  | (3.8-6.0)   | 1               | -           |                 | 1746, 1451                  | 11.4% | (9.7-13.2)  | 1               | -           |                 |                                                       |
| No/other                                                                   | 3122, 4048                  | 9.8%  | (8.7-11.1)  | 2.15            | (1.62-2.87) |                 | 4907, 4289                  | 23.9% | (22.5-25.3) | 2.43            | (2.02-2.93) |                 |                                                       |
| <b>Happy with relationship<sup>h</sup></b>                                 |                             |       |             |                 |             |                 |                             |       |             |                 |             |                 |                                                       |
|                                                                            |                             |       |             |                 |             | <0.0001         |                             |       |             |                 |             | <0.0001         | 0.9717                                                |
| Yes                                                                        | 1951, 2791                  | 7.1%  | (5.9-8.6)   | 1               | -           |                 | 2736, 2601                  | 18.6% | (16.9-20.4) | 1               | -           |                 |                                                       |
| Other                                                                      | 995, 1430                   | 13.3% | (11.2-15.8) | 2.01            | (1.51-2.66) |                 | 1640, 1617                  | 31.4% | (28.8-34.0) | 2.00            | (1.69-2.37) |                 |                                                       |
| <b>Participant does not share same level of interest in sex as partner</b> |                             |       |             |                 |             |                 |                             |       |             |                 |             |                 |                                                       |
|                                                                            |                             |       |             |                 |             | 0.0311          |                             |       |             |                 |             | <0.0001         |                                                       |
| No/other                                                                   | 2270, 3233                  | 8.5%  | (7.2-10.0)  | 1               | -           |                 | 3211, 3064                  | 15.0% | (13.6-16.4) | 1               | -           |                 |                                                       |
| Yes                                                                        | 676, 988                    | 11.6% | (9.2-14.4)  | 1.41            | (1.03-1.92) |                 | 1166, 1155                  | 46.2% | (42.9-49.6) | 4.91            | (4.13-5.83) |                 |                                                       |

Table 2 cont.

|                                                                               | Men                                  |       |             |                        |             |         | Women                                |       |             |                        |             |         |                                                             |
|-------------------------------------------------------------------------------|--------------------------------------|-------|-------------|------------------------|-------------|---------|--------------------------------------|-------|-------------|------------------------|-------------|---------|-------------------------------------------------------------|
|                                                                               | <i>Denom.</i><br>( <i>unwt, wt</i> ) | %     | (95%CI)     | Age-<br>adjusted<br>OR | (95%CI)     | p-value | <i>Denom.</i><br>( <i>unwt, wt</i> ) | %     | (95%CI)     | Age-<br>adjusted<br>OR | (95%CI)     | p-value | <i>p-value for<br/>interaction<br/>with sex<sup>a</sup></i> |
| <b>Participant does not share same sexual likes &amp; dislikes as partner</b> |                                      |       |             |                        |             | 0.0975  |                                      |       |             |                        |             | <0.0001 | 0.0212                                                      |
| No/other                                                                      | 2650, 3803                           | 8.9%  | (7.7-10.2)  | 1                      | -           |         | 4079, 3908                           | 22.1% | (20.6-23.6) | 1                      | -           |         |                                                             |
| Yes                                                                           | 296, 418                             | 12.2% | (8.6-17.0)  | 1.43                   | (0.94-2.18) |         | 297, 310                             | 41.9% | (35.6-48.6) | 2.55                   | (1.93-3.37) |         |                                                             |
| <b>Partner experienced sexual difficulties in past year</b>                   |                                      |       |             |                        |             | 0.0027  |                                      |       |             |                        |             | <0.0001 | 0.6889                                                      |
| No/other                                                                      | 2431, 3454                           | 8.3%  | (7.2-9.6)   | 1                      | -           |         | 3726, 3498                           | 22.1% | (20.6-23.7) | 1                      | -           |         |                                                             |
| Yes                                                                           | 513, 763                             | 13.2% | (10.2-17.0) | 1.68                   | (1.20-2.35) |         | 649, 719                             | 30.4% | (26.5-34.6) | 1.58                   | (1.27-1.95) |         |                                                             |
| <b>Does not feel emotionally close to partner when have sex</b>               |                                      |       |             |                        |             | 0.0225  |                                      |       |             |                        |             | <0.0001 | 0.8228                                                      |
| No/other                                                                      | 2904, 4165                           | 9.1%  | (7.9-10.3)  | 1                      | -           |         | 4263, 4108                           | 22.9% | (21.5-24.4) | 1                      | -           |         |                                                             |
| Yes                                                                           | 42, 56                               | 21.0% | (10.2-38.3) | 2.69                   | (1.15-6.29) |         | 112, 109                             | 47.0% | (36.4-57.8) | 2.98                   | (1.92-4.63) |         |                                                             |
| <b>Lifestyle</b>                                                              |                                      |       |             |                        |             |         |                                      |       |             |                        |             |         |                                                             |
| <b>1+ child(ren) aged &lt;5 in household</b>                                  |                                      |       |             |                        |             | 0.1047  |                                      |       |             |                        |             | 0.0004  | 0.0042                                                      |
| No, none                                                                      | 4100, 5015                           | 8.6%  | (7.6-9.6)   | 1                      | -           |         | 4997, 4671                           | 20.2% | (18.9-21.5) | 1                      | -           |         |                                                             |
| Yes, 1+                                                                       | 727, 941                             | 6.3%  | (4.6-8.5)   | 0.75                   | (0.52-1.06) |         | 1664, 1074                           | 23.5% | (21.2-25.9) | 1.34                   | (1.14-1.58) |         |                                                             |
| <b>Pregnant in the last year</b>                                              |                                      |       |             |                        |             |         |                                      |       |             |                        |             | 0.5927  |                                                             |
| No                                                                            |                                      |       |             |                        |             |         | 4227, 4122                           | 21.8% | (20.4-23.4) | 1                      | -           |         |                                                             |
| Yes                                                                           |                                      |       |             |                        |             |         | 437, 273                             | 20.7% | (16.6-25.6) | 0.92                   | (0.69-1.24) |         |                                                             |
| <b>Used hormonal contraceptive, past year</b>                                 |                                      |       |             |                        |             |         |                                      |       |             |                        |             | 0.1141  |                                                             |
| No                                                                            |                                      |       |             |                        |             |         | 3759, 3838                           | 20.7% | (19.2-22.3) | 1                      | -           |         |                                                             |
| Yes                                                                           |                                      |       |             |                        |             |         | 2806, 1831                           | 20.9% | (19.1-22.7) | 1.14                   | (0.97-1.35) |         |                                                             |
| <b>Sexual health indicators</b>                                               |                                      |       |             |                        |             |         |                                      |       |             |                        |             |         |                                                             |
| <b>Ever diagnosed with a sexually transmitted infection</b>                   |                                      |       |             |                        |             | <0.0001 |                                      |       |             |                        |             | 0.0002  | 0.0291                                                      |
| No (or only thrush)                                                           | 4148, 5128                           | 7.3%  | (6.5-8.3)   | 1                      | -           |         | 5455, 4861                           | 20.0% | (18.7-21.3) | 1                      | -           |         |                                                             |
| Yes (excluding thrush)                                                        | 677, 830                             | 13.7% | (11.0-17.0) | 2.02                   | (1.51-2.70) |         | 1206, 888                            | 25.1% | (22.3-28.1) | 1.39                   | (1.16-1.65) |         |                                                             |

Table 2 cont.

|                                                                         | Men                                |       |             |                    |              |         | Women                              |       |             |                    |             |         |                                                     |
|-------------------------------------------------------------------------|------------------------------------|-------|-------------|--------------------|--------------|---------|------------------------------------|-------|-------------|--------------------|-------------|---------|-----------------------------------------------------|
|                                                                         | <i>Denom.</i><br><i>(unwt, wt)</i> | %     | (95%CI)     | Age-adjusted<br>OR | (95%CI)      | p-value | <i>Denom.</i><br><i>(unwt, wt)</i> | %     | (95%CI)     | Age-adjusted<br>OR | (95%CI)     | p-value | <i>p-value for interaction with sex<sup>a</sup></i> |
| <b>Ever experienced non-volitional sex</b>                              |                                    |       |             |                    |              | <0.0001 |                                    |       |             |                    |             | <0.0001 | 0.1143                                              |
| No                                                                      | 4706, 5825                         | 7.9%  | (7.1-8.9)   | 1                  | -            |         | 5815, 5055                         | 19.4% | (18.2-20.7) | 1                  | -           |         |                                                     |
| Yes/Don't know                                                          | 133, 148                           | 19.4% | (13.1-27.7) | 2.83               | (1.74-4.59)  |         | 848, 695                           | 30.9% | (27.3-34.6) | 1.86               | (1.55-2.25) |         |                                                     |
| <b>Sexual competence at first sex<sup>l</sup></b>                       |                                    |       |             |                    |              | 0.4876  |                                    |       |             |                    |             | <0.0001 | 0.0787                                              |
| Not competent                                                           | 2408, 3039                         | 8.7%  | (7.5-10.0)  | 1                  | -            |         | 3438, 2927                         | 23.6% | (21.9-25.3) | 1                  | -           |         |                                                     |
| Competent                                                               | 2302, 2784                         | 7.8%  | (6.6-9.2)   | 0.91               | (0.71-1.18)  |         | 3097, 2716                         | 17.7% | (16.1-19.3) | 0.70               | (0.61-0.81) |         |                                                     |
| <b>Number of other sexual response problems experienced<sup>l</sup></b> |                                    |       |             |                    |              | <0.0001 |                                    |       |             |                    |             | <0.0001 | 0.0262                                              |
| 0                                                                       | 3209, 3947                         | 5.3%  | (4.4-6.3)   | 1                  | -            |         | 4377, 3759                         | 12.9% | (11.7-14.1) | 1                  | -           |         |                                                     |
| 1                                                                       | 1061, 1350                         | 6.1%  | (4.7-7.8)   | 1.14               | (0.81-1.59)  |         | 1217, 1087                         | 21.7% | (19.0-24.6) | 1.86               | (1.53-2.26) |         |                                                     |
| 2+                                                                      | 570, 678                           | 29.7% | (25.4-34.4) | 7.57               | (5.68-10.10) |         | 1075, 909                          | 52.4% | (48.9-56.0) | 7.48               | (6.25-8.94) |         |                                                     |
| <b>Attitudes</b>                                                        |                                    |       |             |                    |              |         |                                    |       |             |                    |             |         |                                                     |
| <b>People are under pressure to have sex</b>                            |                                    |       |             |                    |              | 0.1437  |                                    |       |             |                    |             | <0.0001 | 0.2192                                              |
| Else                                                                    | 1799, 2264                         | 7.4%  | (6.0-9.0)   | 1                  | -            |         | 1851, 1570                         | 16.4% | (14.5-18.5) | 1                  | -           |         |                                                     |
| Strongly agree/agree                                                    | 3038, 3707                         | 8.7%  | (7.6-9.9)   | 1.21               | (0.94-1.57)  |         | 4817, 4185                         | 22.4% | (21.0-23.9) | 1.47               | (1.24-1.74) |         |                                                     |
| <b>People want less sex as they age</b>                                 |                                    |       |             |                    |              | 0.0005  |                                    |       |             |                    |             | <0.0001 | 0.8045                                              |
| Else                                                                    | 2943, 3472                         | 6.7%  | (5.7-7.8)   | 1                  | -            |         | 4044, 3278                         | 17.1% | (15.8-18.6) | 1                  | -           |         |                                                     |
| Strongly agree/agree                                                    | 1894, 2499                         | 10.3% | (8.8-12.1)  | 1.58               | (1.22-2.04)  |         | 2624, 2477                         | 25.6% | (23.7-27.6) | 1.64               | (1.43-1.90) |         |                                                     |
| <b>Men have a naturally higher sex drive than women</b>                 |                                    |       |             |                    |              |         |                                    |       |             |                    |             | <0.0001 | <0.0001                                             |
| Else                                                                    | 2788, 3441                         | 10.2% | (8.9-11.5)  | 1                  | -            |         | 3351, 2830                         | 15.9% | (14.4-17.4) | 1                  | -           |         |                                                     |
| Strongly agree/agree                                                    | 2049, 2530                         | 5.5%  | (4.4-6.9)   | 0.52               | (0.39-0.68)  |         | 3317, 2925                         | 25.5% | (23.8-27.4) | 1.81               | (1.56-2.09) |         |                                                     |
| <b>Too much sex in the media</b>                                        |                                    |       |             |                    |              | 0.3477  |                                    |       |             |                    |             | 0.0693  | 0.8856                                              |
| Else                                                                    | 1986, 2296                         | 7.5%  | (6.3-9.0)   | 1                  | -            |         | 2091, 1618                         | 18.8% | (16.8-20.9) | 1                  | -           |         |                                                     |
| Strongly agree/agree                                                    | 2851, 3675                         | 8.6%  | (7.5-9.9)   | 1.13               | (0.88-1.46)  |         | 4577, 4137                         | 21.6% | (20.2-23.0) | 1.16               | (0.99-1.36) |         |                                                     |

Denominator is those aged 16-74 years with at least one partner in the past year. Unwt, unweighted; wt, weighted

<sup>a</sup> P-value for interaction to determine whether the magnitude of association between each variable and lack of interest in sex differs between men and women



1  
2  
3  
4  
5  
6  
7  
8  
9  
10  
11  
12  
13  
14  
15  
16  
17  
18  
19  
20  
21  
22  
23  
24  
25  
26  
27  
28  
29  
30  
31  
32  
33  
34  
35  
36  
37  
38  
39  
40  
41  
42  
43  
44  
45  
46  
47  
48  
49

<sup>b</sup> IMD is a multidimensional measure of area (neighbourhood)-level deprivation based on the participant's postcode. IMD scores for England, Scotland and Wales were adjusted before being combined and assigned to quintiles, using a method by Payne and Abel (50).

<sup>c</sup> Participants aged  $\geq 17$  years.

<sup>d</sup> Includes arthritis, heart attack, coronary heart disease, angina, other forms of heart disease, hypertension, stroke, diabetes, broken hip or pelvis, bone or hip replacement ever, backache lasting longer than 3 months, any other muscle or bone disease lasting longer than 3 months, depression, cancer and any thyroid condition treated in the past year.

<sup>e</sup> Participants were asked whether they had often been bothered by feeling down, depressed, or hopeless in the past 2 weeks, and whether they had often been bothered by little interest or pleasure in doing things in the past 2 weeks, using a validated two-question patient health questionnaire (PHQ-2).

<sup>f</sup> Opposite and/or same-sex partners

<sup>g</sup> Other means easy with a husband or wife or regular partner, but difficult with a new partner; easy with a new partner, but difficult with a husband or wife or regular partner; difficult with any partner, it depends, sometimes easy, and sometimes difficult.

<sup>h</sup> Participants were asked to rate how happy they were in their relationship from 1 (very happy) to 7 (very unhappy); responses of 1 or 2 were regarded as denoting participants who were happy with their relationship.

<sup>i</sup> A constructed variable to measure readiness, combining consensuality, autonomy of decision making, timing and use of effective contraception

<sup>j</sup> Sexual response problems (for at least 3 months in past year): lacked enjoyment in sex, felt anxious during sex, felt physical pain as a result of sex, felt no excitement or arousal during sex, difficulty in reaching climax, reached a climax more quickly than you would like, trouble getting or keep an erection (men), uncomfortably dry vagina (women)

Table 3: Associations between reporting lack of interest in having sex for at least 3 months in the past year and other sexual response problems lasting 3 months or more in the past year, by sex

|                                                        | Men                                   |             |                                    |             |                  | Women        |         |                                          |       |                                    |      |              |         |         |
|--------------------------------------------------------|---------------------------------------|-------------|------------------------------------|-------------|------------------|--------------|---------|------------------------------------------|-------|------------------------------------|------|--------------|---------|---------|
|                                                        | Did not report a lack interest in sex |             | Reported a lack of interest in sex |             | AOR <sup>a</sup> | (95%CI)      | p-value | Did not report a lack of interest in sex |       | Reported a lack of interest in sex |      | (95%CI)      | p-value |         |
| Denominators (unwt, wt)                                | 4126, 5077                            |             | 713, 897                           |             |                  |              |         | 4540, 3790                               |       | 2129, 1965                         |      |              |         |         |
| <b>Lacked enjoyment in having sex</b>                  |                                       |             |                                    |             |                  |              |         |                                          |       |                                    |      |              | <0.0001 | <0.0001 |
| No                                                     | 97.7%                                 | (97.1-98.1) | 81.5%                              | (78.2-84.4) | 1                | -            | 95.9%   | (95.1-96.5)                              | 72.5% | (70.2-74.7)                        | 1    | -            |         |         |
| Yes                                                    | 2.3%                                  | (1.9-2.9)   | 18.5%                              | (15.6-21.8) | 9.78             | (7.11-13.46) | 4.1%    | (3.5-4.9)                                | 27.5% | (25.3-29.8)                        | 8.95 | (7.28-11.01) |         |         |
| <b>Felt anxious during sex</b>                         |                                       |             |                                    |             |                  |              |         |                                          |       |                                    |      |              | <0.0001 | <0.0001 |
| No                                                     | 96.1%                                 | (95.5-96.7) | 85.8%                              | (82.6-88.5) | 1                | -            | 97.3%   | (96.7-97.7)                              | 89.9% | (88.4-91.3)                        | 1    | -            |         |         |
| Yes                                                    | 3.9%                                  | (3.3-4.5)   | 14.2%                              | (11.5-17.4) | 4.16             | (3.08-5.62)  | 2.7%    | (2.3-3.3)                                | 10.1% | (8.7-11.6)                         | 4.4  | (3.43-5.65)  |         |         |
| <b>Felt physical pain as a result of sex</b>           |                                       |             |                                    |             |                  |              |         |                                          |       |                                    |      |              | 0.0213  | <0.0001 |
| No                                                     | 98.4%                                 | (97.9-98.8) | 97.1%                              | (95.6-98.1) | 1                | -            | 95.7%   | (95.0-96.3)                              | 86.5% | (84.6-88.1)                        | 1    | -            |         |         |
| Yes                                                    | 1.6%                                  | (1.2-2.1)   | 2.9%                               | (1.9-4.4)   | 1.87             | (1.10-3.19)  | 4.3%    | (3.7-5.0)                                | 13.5% | (11.9-15.4)                        | 3.55 | (2.83-4.45)  |         |         |
| <b>Felt no excitement or arousal during sex</b>        |                                       |             |                                    |             |                  |              |         |                                          |       |                                    |      |              | <0.0001 | <0.0001 |
| No                                                     | 98.5%                                 | (98.0-98.9) | 87.7%                              | (85.0-90.0) | 1                | -            | 97.5%   | (96.9-97.9)                              | 80.9% | (79.0-82.7)                        | 1    | -            |         |         |
| Yes                                                    | 1.5%                                  | (1.1-2.0)   | 12.3%                              | (10.0-15.0) | 9.21             | (6.33-13.40) | 2.5%    | (2.1-3.1)                                | 19.1% | (17.3-21.0)                        | 9.16 | (7.16-11.70) |         |         |
| <b>Difficulty in reaching climax</b>                   |                                       |             |                                    |             |                  |              |         |                                          |       |                                    |      |              | <0.0001 | <0.0001 |
| No                                                     | 92.7%                                 | (91.7-93.5) | 80.5%                              | (76.6-83.8) | 1                | -            | 88.3%   | (87.2-89.3)                              | 74.9% | (72.7-76.9)                        | 1    | -            |         |         |
| Yes                                                    | 7.3%                                  | (6.5-8.3)   | 19.5%                              | (16.2-23.4) | 3.08             | (2.37-3.99)  | 11.7%   | (10.7-12.8)                              | 25.1% | (23.1-27.3)                        | 2.6  | (2.23-3.03)  |         |         |
| <b>Reached climax more quickly than you would like</b> |                                       |             |                                    |             |                  |              |         |                                          |       |                                    |      |              | 0.0198  | 0.3658  |
| No                                                     | 85.6%                                 | (84.3-86.9) | 82.0%                              | (78.7-85.0) | 1                | -            | 97.8%   | (97.2-98.2)                              | 97.5% | (96.7-98.1)                        | 1    | -            |         |         |
| Yes                                                    | 14.4%                                 | (13.1-15.7) | 18.0%                              | (15.0-21.3) | 1.32             | (1.05-1.68)  | 2.2%    | (1.8-2.8)                                | 2.5%  | (1.9-3.3)                          | 1.18 | (0.82-1.69)  |         |         |
| <b>Trouble getting or keeping an erection</b>          |                                       |             |                                    |             |                  |              |         |                                          |       |                                    |      |              | <0.0001 |         |
| No                                                     | 88.5%                                 | (87.3-89.6) | 79.4%                              | (75.9-82.6) | 1                | -            |         |                                          |       |                                    |      |              |         |         |
| Yes                                                    | 11.5%                                 | (10.4-12.7) | 20.6%                              | (17.4-24.1) | 1.97             | (1.55-2.51)  |         |                                          |       |                                    |      |              |         |         |
| <b>Uncomfortably dry vagina</b>                        |                                       |             |                                    |             |                  |              |         |                                          |       |                                    |      |              |         | <0.0001 |
| No                                                     |                                       |             |                                    |             |                  |              | 90.7%   | (89.5-91.7)                              | 80.1% | (77.9-82.1)                        | 1    | -            |         |         |
| Yes                                                    |                                       |             |                                    |             |                  |              | 9.3%    | (8.3-10.5)                               | 19.9% | (17.9-22.1)                        | 2.28 | (1.89-2.76)  |         |         |

Denominator is those aged 16-74 years with at least one partner in the past year. Unwt, unweighted; wt, weighted

AOR comparing those reporting lacking interest to those who did not.

1  
2  
3  
4  
5  
6  
7  
8  
9  
10  
11  
12  
13  
14  
15  
16  
17  
18  
19  
20  
21  
22  
23  
24  
25  
26  
27  
28  
29  
30  
31  
32  
33  
34  
35  
36  
37  
38  
39  
40  
41  
42  
43  
44  
45  
46  
47  
48  
49

STROBE Statement—checklist of items that should be included in reports of observational studies

|                           | Item No. | Recommendation                                                                                      | Page No.        | Relevant text from manuscript                                                                                                                                                                                                                                                                                                                                                                                                  |
|---------------------------|----------|-----------------------------------------------------------------------------------------------------|-----------------|--------------------------------------------------------------------------------------------------------------------------------------------------------------------------------------------------------------------------------------------------------------------------------------------------------------------------------------------------------------------------------------------------------------------------------|
| <b>Title and abstract</b> | 1        | (a) Indicate the study’s design with a commonly used term in the title or the abstract              | Title, Abstract | Survey; cross-sectional probability sample survey                                                                                                                                                                                                                                                                                                                                                                              |
|                           |          | (b) Provide in the abstract an informative and balanced summary of what was done and what was found | Abstract        | Complex survey analyses of data collected for a cross-sectional probability sample survey, undertaken 2010-12, specifically logistic regression to calculate age-adjusted odds ratios (AOR) to identify associated factors                                                                                                                                                                                                     |
| <b>Introduction</b>       |          |                                                                                                     |                 |                                                                                                                                                                                                                                                                                                                                                                                                                                |
| Background/rationale      | 2        | Explain the scientific background and rationale for the investigation being reported                | 4-5             | In summary, the evidence on the factors associated with men’s and women’s reports of low sexual desire is drawn largely from non-representative samples, is somewhat equivocal and, in men, sparse. Understanding the correlates of lacking interest in sex would be useful to identify individuals most at risk of sexual problems and could also inform what types of therapeutic options for this group should be provided. |
| Objectives                | 3        | State specific objectives, including any prespecified hypotheses                                    | 5               | The research questions addressed in this paper are: (1)                                                                                                                                                                                                                                                                                                                                                                        |

1  
2  
3  
4  
5  
6  
7  
8  
9  
10  
11  
12  
13  
14  
15  
16  
17  
18  
19  
20  
21  
22  
23  
24  
25  
26  
27  
28  
29  
30  
31  
32  
33  
34  
35  
36  
37  
38  
39  
40  
41  
42  
43  
44  
45  
46  
47  
48  
49

For peer review only

|                |   |                                                                                                                                                                                                                                                  |   |                                                                                                                                                                                                                                                                                                                                       |
|----------------|---|--------------------------------------------------------------------------------------------------------------------------------------------------------------------------------------------------------------------------------------------------|---|---------------------------------------------------------------------------------------------------------------------------------------------------------------------------------------------------------------------------------------------------------------------------------------------------------------------------------------|
|                |   |                                                                                                                                                                                                                                                  |   | What sociodemographic, relationship, sexual behaviour, and sexual attitudinal factors are associated with lacking interest in sex in sexually active men and women?; (2) To what extent do these factors vary by gender?; (3) What are the associations between reporting lacking interest in sex and other sexual function problems? |
| <b>Methods</b> |   |                                                                                                                                                                                                                                                  |   |                                                                                                                                                                                                                                                                                                                                       |
| Study design   | 4 | Present key elements of study design early in the paper                                                                                                                                                                                          | 6 | A multi-stage, clustered, and stratified probability sample design was used and participants were interviewed using a combination of computer-assisted personal interviews (CAPI), and computer-assisted self-interviews (CASI).                                                                                                      |
| Setting        | 5 | Describe the setting, locations, and relevant dates, including periods of recruitment, exposure, follow-up, and data collection                                                                                                                  | 6 | Natsal-3 is a probability sample survey of 15,162 men and women aged 16-74 years in Britain, interviewed between September 2010 and August 2012.                                                                                                                                                                                      |
| Participants   | 6 | (a) <i>Cohort study</i> —Give the eligibility criteria, and the sources and methods of selection of participants. Describe methods of follow-up<br><i>Case-control study</i> —Give the eligibility criteria, and the sources and methods of case | 6 | For the current analyses, only respondents who reported ≥1 sexual partner (opposite-sex or                                                                                                                                                                                                                                            |

1  
2  
3  
4  
5  
6  
7  
8  
9  
10  
11  
12  
13  
14  
15  
16  
17  
18  
19  
20  
21  
22  
23  
24  
25  
26  
27  
28  
29  
30  
31  
32  
33  
34  
35  
36  
37  
38  
39  
40  
41  
42  
43  
44  
45  
46  
47  
48  
49

|                              |    |                                                                                                                                                                                                                        |     |                                                                                                                                                                                                                                                                                                                                                                                                                                                                                                        |
|------------------------------|----|------------------------------------------------------------------------------------------------------------------------------------------------------------------------------------------------------------------------|-----|--------------------------------------------------------------------------------------------------------------------------------------------------------------------------------------------------------------------------------------------------------------------------------------------------------------------------------------------------------------------------------------------------------------------------------------------------------------------------------------------------------|
|                              |    | ascertainment and control selection. Give the rationale for the choice of cases and controls<br><i>Cross-sectional study</i> —Give the eligibility criteria, and the sources and methods of selection of participants  |     | same-sex) in the past year were included (4,839 men and 6,669 women).                                                                                                                                                                                                                                                                                                                                                                                                                                  |
|                              |    | <i>(b) Cohort study</i> —For matched studies, give matching criteria and number of exposed and unexposed<br><i>Case-control study</i> —For matched studies, give matching criteria and the number of controls per case |     |                                                                                                                                                                                                                                                                                                                                                                                                                                                                                                        |
| Variables                    | 7  | Clearly define all outcomes, exposures, predictors, potential confounders, and effect modifiers. Give diagnostic criteria, if applicable                                                                               | 6-7 | We used selected items from the Natsal-SF, a newly developed and validated measure of sexual function comprising questions about problems with sexual response, relational aspects of sexual function, and self-appraisal of sex life                                                                                                                                                                                                                                                                  |
| Data sources/<br>measurement | 8* | For each variable of interest, give sources of data and details of methods of assessment (measurement). Describe comparability of assessment methods if there is more than one group                                   | 6-7 | In the CASI, participants who reported at least one sexual partner in the past year (hereon 'sexually active participants') were asked: ' <i>In the last year, have you experienced any of the following for a period of 3 months or longer?</i> ' and were given a list of difficulties and asked to indicate which they had experienced. The list included ' <i>Lacked interest in having sex</i> '. Those indicating this difficulty were defined as lacking interest in having sex for a period of |

1  
2  
3  
4  
5  
6  
7  
8  
9  
10  
11  
12  
13  
14  
15  
16  
17  
18  
19  
20  
21  
22  
23  
24  
25  
26  
27  
28  
29  
30  
31  
32  
33  
34  
35  
36  
37  
38  
39  
40  
41  
42  
43  
44  
45  
46  
47  
48  
49

three months or more in the past year (the outcome for this analysis). Individuals reporting lacking interest in sex for at least 3 months were then asked 'And how do you feel about this?' with response options: *not at all distressed, a little distressed, fairly distressed; very distressed*. Those answering a little, fairly or very distressed were defined as lacking interest in sex and having distress about this symptom (outcome for sensitivity analysis, see below).

|            |    |                                                           |   |                                                                                                                                                                                                                                                                                                    |
|------------|----|-----------------------------------------------------------|---|----------------------------------------------------------------------------------------------------------------------------------------------------------------------------------------------------------------------------------------------------------------------------------------------------|
| Bias       | 9  | Describe any efforts to address potential sources of bias | 6 | <a href="#">After weighting to adjust for unequal probabilities of selection and to match the British population in terms of age, gender and geographical region, the Natsal-3 sample was broadly representative, on key variables, of the British population as described by the 2011 Census.</a> |
| Study size | 10 | Explain how the study size was arrived at                 | - |                                                                                                                                                                                                                                                                                                    |

Continued on next page

1  
2  
3  
4  
5  
6  
7  
8  
9  
10  
11  
12  
13  
14  
15  
16  
17  
18  
19  
20  
21  
22  
23  
24  
25  
26  
27  
28  
29  
30  
31  
32  
33  
34  
35  
36  
37  
38  
39  
40  
41  
42  
43  
44  
45  
46  
47  
48  
49

|                        |    |                                                                                                                              |   |                                                                                                                                                                                                                                                                                                                                                                                                                                                                                                                           |
|------------------------|----|------------------------------------------------------------------------------------------------------------------------------|---|---------------------------------------------------------------------------------------------------------------------------------------------------------------------------------------------------------------------------------------------------------------------------------------------------------------------------------------------------------------------------------------------------------------------------------------------------------------------------------------------------------------------------|
| Quantitative variables | 11 | Explain how quantitative variables were handled in the analyses. If applicable, describe which groupings were chosen and why | 7 | All analyses were done using the complex survey functions of STATA (version 14; StataCorp LP, College Station, Texas) to account for the weighting, clustering, and stratification of the data.                                                                                                                                                                                                                                                                                                                           |
| Statistical methods    | 12 | (a) Describe all statistical methods, including those used to control for confounding                                        | 7 | We used multivariable logistic regression to calculate age-adjusted odds ratios (AOR) to examine the associations between reports of lacking interest in sex lasting three months or longer in the past year, and sociodemographic, health, relationship, sexual behaviour, and sexual attitude variables. For each variable, we also tested the interaction between gender, to see if the magnitude of the associations between the above factors and reports of lacking interest in sex was the same for men and women. |
|                        |    | (b) Describe any methods used to examine subgroups and interactions                                                          | 7 | -                                                                                                                                                                                                                                                                                                                                                                                                                                                                                                                         |
|                        |    | (c) Explain how missing data were addressed                                                                                  | - | -                                                                                                                                                                                                                                                                                                                                                                                                                                                                                                                         |
|                        |    | (d) <i>Cohort study</i> —If applicable, explain how loss to follow-up was addressed                                          |   |                                                                                                                                                                                                                                                                                                                                                                                                                                                                                                                           |
|                        |    | <i>Case-control study</i> —If applicable, explain how matching of cases and controls was addressed                           |   |                                                                                                                                                                                                                                                                                                                                                                                                                                                                                                                           |
|                        |    | <i>Cross-sectional study</i> —If applicable, describe analytical methods taking account of sampling strategy                 |   |                                                                                                                                                                                                                                                                                                                                                                                                                                                                                                                           |
|                        |    | (e) Describe any sensitivity analyses                                                                                        | 7 | We conducted a sensitivity analysis for the outcome variable reporting lack of interest in sex lasting three months or longer <i>and</i> distress about                                                                                                                                                                                                                                                                                                                                                                   |

|                  |     |                                                                                                                                                                                                              |            |  |                                                                                                                                                                          |
|------------------|-----|--------------------------------------------------------------------------------------------------------------------------------------------------------------------------------------------------------------|------------|--|--------------------------------------------------------------------------------------------------------------------------------------------------------------------------|
|                  |     |                                                                                                                                                                                                              |            |  | this symptom to assess whether similar associations were found.                                                                                                          |
| <b>Results</b>   |     |                                                                                                                                                                                                              |            |  |                                                                                                                                                                          |
| Participants     | 13* | (a) Report numbers of individuals at each stage of study—eg numbers potentially eligible, examined for eligibility, confirmed eligible, included in the study, completing follow-up, and analysed            | 6          |  | For the current analyses, only respondents who reported $\geq 1$ sexual partner (opposite-sex or same-sex) in the past year were included (4,839 men and 6,669 women).   |
|                  |     | (b) Give reasons for non-participation at each stage                                                                                                                                                         | -          |  |                                                                                                                                                                          |
|                  |     | (c) Consider use of a flow diagram                                                                                                                                                                           | -          |  |                                                                                                                                                                          |
| Descriptive data | 14* | (a) Give characteristics of study participants (eg demographic, clinical, social) and information on exposures and potential confounders                                                                     | 6          |  | More extensive details of the survey methodology and sample characteristics are published elsewhere (21,22) and for demographic characteristics of the sample, see (22). |
|                  |     | (b) Indicate number of participants with missing data for each variable of interest                                                                                                                          | -          |  |                                                                                                                                                                          |
|                  |     | (c) <i>Cohort study</i> —Summarise follow-up time (eg, average and total amount)                                                                                                                             | -          |  |                                                                                                                                                                          |
| Outcome data     | 15* | <i>Cohort study</i> —Report numbers of outcome events or summary measures over time                                                                                                                          |            |  |                                                                                                                                                                          |
|                  |     | <i>Case-control study</i> —Report numbers in each exposure category, or summary measures of exposure                                                                                                         |            |  |                                                                                                                                                                          |
|                  |     | <i>Cross-sectional study</i> —Report numbers of outcome events or summary measures                                                                                                                           | Tables 1-2 |  |                                                                                                                                                                          |
| Main results     | 16  | (a) Give unadjusted estimates and, if applicable, confounder-adjusted estimates and their precision (eg, 95% confidence interval). Make clear which confounders were adjusted for and why they were included | Tables 1-2 |  |                                                                                                                                                                          |
|                  |     | (b) Report category boundaries when continuous variables were categorized                                                                                                                                    | -          |  |                                                                                                                                                                          |
|                  |     | (c) If relevant, consider translating estimates of relative risk into absolute risk for a meaningful time period                                                                                             | -          |  |                                                                                                                                                                          |

Continued on next page



1  
2  
3  
4  
5  
6  
7  
8  
9  
10  
11  
12  
13  
14  
15  
16  
17  
18  
19  
20  
21  
22  
23  
24  
25  
26  
27  
28  
29  
30  
31  
32  
33  
34  
35  
36  
37  
38  
39  
40  
41  
42  
43  
44  
45  
46  
47  
48  
49

|                   |    |                                                                                                                                                            |       |                                                                                                                                                                                                                                                                                                                                                                                                                                                                                                                                                               |
|-------------------|----|------------------------------------------------------------------------------------------------------------------------------------------------------------|-------|---------------------------------------------------------------------------------------------------------------------------------------------------------------------------------------------------------------------------------------------------------------------------------------------------------------------------------------------------------------------------------------------------------------------------------------------------------------------------------------------------------------------------------------------------------------|
| Other analyses    | 17 | Report other analyses done—eg analyses of subgroups and interactions, and sensitivity analyses                                                             | 11    | Table 2 presents the associations between lacking interest in sex and being distressed about this (as a measure/marker of severity), and the above sociodemographic, health, and sexual relationship/behaviour variables.                                                                                                                                                                                                                                                                                                                                     |
| <b>Discussion</b> |    |                                                                                                                                                            |       |                                                                                                                                                                                                                                                                                                                                                                                                                                                                                                                                                               |
| Key results       | 18 | Summarise key results with reference to study objectives                                                                                                   | 11-12 | We identified a broad range of factors, including some that have not been explored in previous large-scale surveys, that were associated with men’s and women’s reports of lacking interest in sex in a representative British population-based survey. Our findings, discussed below, revealed some gender similarities as well as some interesting gender differences. The strongest evidence for gender differences was for the relationship context variables, where associations with lacking interest in sex were much stronger for women than for men. |
| Limitations       | 19 | Discuss limitations of the study, taking into account sources of potential bias or imprecision. Discuss both direction and magnitude of any potential bias | 15    | Limitations include the cross-sectional nature of the data, which mean that we are unable to infer temporality and causality. We only used a single item to assess lacking                                                                                                                                                                                                                                                                                                                                                                                    |

Formatted Table

1  
2  
3  
4  
5  
6  
7  
8  
9  
10  
11  
12  
13  
14  
15  
16  
17  
18  
19  
20  
21  
22  
23  
24  
25  
26  
27  
28  
29  
30  
31  
32  
33  
34  
35  
36  
37  
38  
39  
40  
41  
42  
43  
44  
45  
46  
47  
48  
49

For peer review

interest in sex, although we additionally took account of whether those who reported this also reported that it caused them distress, as a way of trying to capture more problematic lack of interest. It is important to acknowledge, however, that these data do not necessarily correspond to clinical diagnoses. This sensitivity analysis enabled us to demonstrate that for most variables, similar associations exist regardless of whether or not distress was reported. Finally, we have tested many associations within this study and some will have been significant by chance.

|                  |    |                                                                                                                                                                            |       |                                                                                                                                                                                                                                                                                   |
|------------------|----|----------------------------------------------------------------------------------------------------------------------------------------------------------------------------|-------|-----------------------------------------------------------------------------------------------------------------------------------------------------------------------------------------------------------------------------------------------------------------------------------|
| Interpretation   | 20 | Give a cautious overall interpretation of results considering objectives, limitations, multiplicity of analyses, results from similar studies, and other relevant evidence | 16-17 | The findings indicate that reporting lack of interest in sex is associated with a broad range of predictors across sociodemographic, relationship, sexual behaviour, and sexual attitudinal domains.                                                                              |
| Generalisability | 21 | Discuss the generalisability (external validity) of the study results                                                                                                      | +56   | <u>After weighting to adjust for unequal probabilities of selection and to match the British population in terms of age, gender and geographical region, the Natsal-3 sample was broadly representative, on key variables, of the British population as described by the 2011</u> |

1  
2  
3  
4  
5  
6  
7  
8  
9  
10  
11  
12  
13  
14  
15  
16  
17  
18  
19  
20  
21  
22  
23  
24  
25  
26  
27  
28  
29  
30  
31  
32  
33  
34  
35  
36  
37  
38  
39  
40  
41  
42  
43  
44  
45  
46  
47  
48  
49

For peer review only

|                          |    |                                                                                                                                                               |                    |                                                                                                                                                                                                                                                                                                                                        |
|--------------------------|----|---------------------------------------------------------------------------------------------------------------------------------------------------------------|--------------------|----------------------------------------------------------------------------------------------------------------------------------------------------------------------------------------------------------------------------------------------------------------------------------------------------------------------------------------|
|                          |    |                                                                                                                                                               | <a href="#">15</a> | <a href="#">Census.</a><br><a href="#">The sample is representative of those resident in private households in Britain i.e., not those living in institutions.</a><br><a href="#">Strengths of our study include the use of national probability sample survey data involving both men and women across a wide age range (21, 22).</a> |
| <b>Other information</b> |    |                                                                                                                                                               |                    |                                                                                                                                                                                                                                                                                                                                        |
| Funding                  | 22 | Give the source of funding and the role of the funders for the present study and, if applicable, for the original study on which the present article is based | 18                 | Natsal-3 was supported by grants from the U.K. Medical Research Council (G0701757) and the Wellcome Trust (084840), with support from the Economic and Social Research Council and the Department of Health.                                                                                                                           |

\*Give information separately for cases and controls in case-control studies and, if applicable, for exposed and unexposed groups in cohort and cross-sectional studies.

**Note:** An Explanation and Elaboration article discusses each checklist item and gives methodological background and published examples of transparent reporting. The STROBE checklist is best used in conjunction with this article (freely available on the Web sites of PLoS Medicine at <http://www.plosmedicine.org/>, Annals of Internal Medicine at <http://www.annals.org/>, and Epidemiology at <http://www.epidem.com/>). Information on the STROBE Initiative is available at [www.strobe-statement.org](http://www.strobe-statement.org).
